# Supplementary material
Source: PubMed Central journal article supplement (PMC2756580)

## SUPPORTING INFORMATION

### **Thio FCMA Intermediates as Strong Acyl Donors: A General Solution to the Formation of Complex Amide Bonds**

Yu Rao, Xuechen Li, Samuel J Danishefsky\*

Laboratory for Bioorganic Chemistry, Sloan-Kettering Institute for Cancer Research,  
1275 York Avenue, New York, NY 10065, USA

Department of Chemistry, Columbia University, 3000 Broadway, New York, NY 10027.

#### **Materials and Methods**

All commercial materials (Aldrich, Fluka) were used without further purification. All solvents were reagent grade or HPLC grade (Fisher). Anhydrous THF, diethyl ether, CH<sub>2</sub>Cl<sub>2</sub>, toluene, and benzene were obtained from a dry solvent system (passed through column of alumina) and used without further drying. All reactions were performed under an atmosphere of pre-purified dry Ar(g). <sup>1</sup>H NMR spectra and <sup>13</sup>C NMR spectra were recorded on a Bruker Advance DRX-500 MHz or DRX-600 MHz at ambient temperature unless otherwise stated. Chemical shifts are reported in parts per million relative to residual solvent CDCl<sub>3</sub> (<sup>1</sup>H, δ 7.27 ppm; <sup>13</sup>C, 77.23 ppm). All <sup>13</sup>C NMR spectra were recorded with complete proton decoupling. Low-resolution mass spectral analyses were performed with a JOEL JMS-DX-303-HF mass spectrometer or Waters Micromass ZQ mass spectrometer. All reactions were carried out in oven-dried glassware under argon atmosphere unless otherwise noted. Analytical TLC was performed on E. Merck silica gel 60 F254 plates and flash column chromatography was performed on E. Merck silica gel 60 (40–63 μm).

#### **General Procedure for the Preparation of Thio Acid:**

To an oven dried round bottom flask was charged amino acid (2.00 mmol) and 5 mL anhydrous THF. The resulting solution was cooled to -10 °C and N-methyl morpholine (2.50 mmol) was added dropwise, followed by the addition of isobutyl chloroformate

(2.50 mmol). The reaction mixture was warmed to 0 °C and stirred for another 30 min, then a stream of H<sub>2</sub>S gas (Cautions: H<sub>2</sub>S is highly toxic and must be used in a well ventilated fume hood) was bubbled through the reaction mixture for 1 h at room temperature. THF was removed by a stream of N<sub>2</sub> in the fume hood and the residue was suspended in 40 mL EtOAc. The organic layer was washed by 1 N HCl and brine, dried over anhydrous sodium sulfate. Solvent was removed under vacuum and the residue was used as such without further purification.

### **General Procedure for Three-Component-Coupling Reactions:**

To a CH<sub>2</sub>Cl<sub>2</sub> (1.0 mL) solution of thio acid (0.20 mmol) was added t-butyl isonitrile (0.40 mmol) and amine (0.60 mmol). This reaction mixture was stirred at room temperature for 2 h before quenching with 1N HCl. After sequential washing with 1N HCl, NaHCO<sub>3</sub>(sat.) and brine, the organic layer was dried over Na<sub>2</sub>SO<sub>4</sub>. Then, after filtration, CH<sub>2</sub>Cl<sub>2</sub> was removed under vacuum. The residue was purified by flash column chromatography.

### **(S)-allyl 4-(((9H-fluoren-9-yl)methoxy)carbonylamino)-5-(N-cyclohexylmethanethioamido)-5-oxopentanoate (12)**

To a CH<sub>2</sub>Cl<sub>2</sub> (1.0 mL) solution of thio acid **10** (0.10 mmol) was added cyclohexyl isonitrile (0.15 mmol). This reaction mixture was stirred at room temperature for 4 h and CH<sub>2</sub>Cl<sub>2</sub> was removed under vacuum. The residue was purified by flash column chromatography. Compound **12** was isolated in 55% yield (29.4 mg). <sup>1</sup>H NMR (500 MHz, CDCl<sub>3</sub>), δ 10.50 (s, 1H), 7.71 (m, 2H), 7.52 (m, 2H), 7.35 (m, 2H), 7.25 (m, 2H), 5.87 (m, 1H), 5.49 (d, J = 8.4 Hz, 1H), 5.27 (m, 3H), 5.04 (m, 1H), 4.56 (d, J = 5.4 Hz, 2H), 4.36 (d, J = 6.7 Hz, 2H), 4.15 (t, J = 6.7 Hz, 1H), 2.42 (m, 2H), 2.13 (m, 2H), 1.77 (m, 2H), 1.61 (m, 2H), 1.20 (m, 6H); <sup>13</sup>C NMR (125 MHz, CDCl<sub>3</sub>), δ 194.4, 174.1, 172.0, 156.1, 143.7, 143.5, 141.3, 131.8, 127.9, 127.2, 125.0, 120.1, 118.8, 67.3, 65.7, 60.4, 57.7, 52.5, 47.1, 31.6, 29.7, 29.5, 29.0, 28.3, 26.2, 25.3, 22.64, 22.61; IR (thin film) 2934, 2855, 1711, 1540, 1450, 1403, 1358, 1316, 1245, 1179, 1129, 1071, 988, 936, 894 cm<sup>-1</sup>; HRMS [M+Na]<sup>+</sup> Calculated for C<sub>30</sub>H<sub>34</sub>N<sub>2</sub>O<sub>5</sub>S 557.2086, found 557.2082.

**(S)-allyl 4-(((9H-fluoren-9-yl)methoxy)carbonylamino)-5-oxo-5-phenylamino)pentanoate (13)**

To a CH<sub>2</sub>Cl<sub>2</sub> (1.0 mL) solution of thio acid **10** (0.10 mmol) were added t-butyl isonitrile (0.20 mmol) and aniline (0.30 mmol). This reaction mixture was stirred at room temperature for 2 h before quenching with 1N HCl. After sequential washing with 1N HCl, NaHCO<sub>3</sub>(sat.) and brine, the organic layer was dried over Na<sub>2</sub>SO<sub>4</sub>. Then, after filtration, CH<sub>2</sub>Cl<sub>2</sub> was removed under vacuum. The residue was purified by flash column chromatography. Compound **13** was isolated in 77% yield (37.3 mg). <sup>1</sup>H NMR (500 MHz, CDCl<sub>3</sub>), δ 8.25 (brs, 1H), 7.70 (m, 2H), 7.52 (m, 2H), 7.46 (m, 2H), 7.32 (m, 2H), 7.22 (m, 4H), 7.07 (m, 1H), 5.87 (m, 1H), 5.67 (brs, 1H), 5.28 (m, 2H), 4.56 (d, J = 5.6 Hz, 2H), 4.37 (d, J = 6.7 Hz, 2H), 4.29 (s, 1H), 4.16 (t, J = 6.9 Hz, 1H), 2.60 (m, 1H), 2.44 (m, 1H), 2.17 (m, 1H), 1.98 (m, 1H); <sup>13</sup>C NMR (125 MHz, CDCl<sub>3</sub>), δ 173.5, 169.3, 156.6, 143.7, 143.6, 141.31, 141.30, 137.4, 131.8, 129.0, 127.8, 127.1, 125.0, 124.6, 120.0, 119.9, 118.7, 67.3, 65.6, 54.8, 47.1, 38.6, 30.5, 28.1; IR (thin film) 3293, 1729, 1689, 1659, 1599, 1536, 1445, 1389, 1276, 1257, 1187, 1168, 1085, 1046, 845 cm<sup>-1</sup>; HRMS [M+Na]<sup>+</sup> Calculated for C<sub>29</sub>H<sub>28</sub>N<sub>2</sub>O<sub>5</sub> 507.1896, found 507.1898.

**N-phenylbenzamide (18)**

Following the general procedure, compound **18** was isolated in 88% yield (34.6 mg). <sup>1</sup>H NMR (500 MHz, CDCl<sub>3</sub>), δ 7.91 (m, 2H), 7.81 (s, 1H), 7.68 (d, J = 7.7 Hz, 2H), 7.59 (m, 1H), 7.53 (m, 2H), 7.43 (m, 2H), 7.20 (m, 1H); <sup>13</sup>C NMR (125 MHz, CDCl<sub>3</sub>), δ 165.8, 137.9, 135.0, 131.8, 129.3, 129.1, 128.8, 127.0, 124.6, 120.2, 118.5, 115.1; IR (thin film) 3344, 1735, 1654, 1600, 1537, 1438, 1323, 1260, 1116, 928, 886 cm<sup>-1</sup>; HRMS [M+H]<sup>+</sup> Calculated for C<sub>13</sub>H<sub>11</sub>NO 198.0919, found 198.0916.

**(R)-benzyl 2-(tert-butoxycarbonylamino)-4-oxo-4-(phenylamino)butanoate (19)**

Following the general procedure, compound **19** was isolated in 86% yield (68.5 mg). <sup>1</sup>H NMR (500 MHz, CDCl<sub>3</sub>), δ 7.49 (m, 2H), 7.44 (s, 1H), 7.36 (m, 7H), 7.16 (m, 1H), 5.81 (d, J = 6.9 Hz, 1H), 5.26 (d, J = 12.2 Hz, 1H), 5.21 (d, J = 12.2 Hz, 1H), 4.65 (m, 1H), 3.12 (dd, J = 3.6 Hz, J = 12.9 Hz, 1H), 2.96 (dd, J = 3.9 Hz, J = 15.9 Hz, 1H), 1.45 (s, 9H); <sup>13</sup>C NMR (125 MHz, CDCl<sub>3</sub>), δ 172.7, 169.7, 157.3, 139.0, 136.8, 130.4, 129.9,

129.8, 129.6, 125.9, 121.4, 81.6, 68.9, 61.9, 51.9, 40.5, 29.7, 22.5, 15.6; IR (thin film) 3318, 2978, 1736, 1686, 1600, 1544, 1497, 1443, 1367, 1250, 1213, 1161, 1054, 1026, 978  $\text{cm}^{-1}$ ; HRMS  $[\text{M}+\text{Na}]^+$  Calculated for  $\text{C}_{22}\text{H}_{26}\text{N}_2\text{O}_5$  421.1753, found 421.1749.

### **N-phenylpivalamide (20)**

Following the general procedure, compound **20** was isolated in 83% yield (29.4 mg).  $^1\text{H}$  NMR (500 MHz,  $\text{CDCl}_3$ ),  $\delta$  7.45 (m, 2H), 7.25 (m, 3H), 7.03 (m, 1H), 1.29 (s, 9H);  $^{13}\text{C}$  NMR (125 MHz,  $\text{CDCl}_3$ ),  $\delta$  176.6, 138.0, 129.0, 124.2, 120.0, 39.6, 27.6; IR (thin film) 3313, 2985, 2965, 2931, 1654, 1596, 1533, 1490, 1437, 1400, 1317, 1241, 1169, 928, 903  $\text{cm}^{-1}$ ; HRMS  $[\text{M}+\text{H}]^+$  Calculated for  $\text{C}_{11}\text{H}_{15}\text{NO}$  178.1232, found 178.1225.

### **N-Phenyl-1-adamantanecarboxamide (21)**

Following the general procedure, compound **21** was isolated in 85% yield (43.4 mg).  $^1\text{H}$  NMR (500 MHz,  $\text{CDCl}_3$ ),  $\delta$  7.35 (m, 2H), 7.13 (m, 3H), 6.91 (m, 1H), 1.91 (s, 3H), 1.78 (s, 6H), 1.58 (m, 6H);  $^{13}\text{C}$  NMR (125 MHz,  $\text{CDCl}_3$ ),  $\delta$  176.1, 138.1, 128.9, 124.1, 120.0, 41.5, 39.3, 36.5, 28.2; IR (thin film) 3295, 2899, 2850, 1718, 1644, 1596, 1537, 1503, 1490, 1438, 1328, 1309, 1254, 1178, 925  $\text{cm}^{-1}$ ; HRMS  $[\text{M}+\text{H}]^+$  Calculated for  $\text{C}_{17}\text{H}_{21}\text{NO}$  256.1701, found 256.1704.

### **N-tert-butylpivalamide (22)**

Following the general procedure, compound **22** was isolated in 61% yield (19.1 mg).  $^1\text{H}$  NMR (500 MHz,  $\text{CDCl}_3$ ),  $\delta$  5.32 (s, 1H), 1.25 (s, 9H), 1.10 (s, 9H);  $^{13}\text{C}$  NMR (125 MHz,  $\text{CDCl}_3$ ),  $\delta$  179.2, 52.1, 40.4, 30.1, 29.1; IR (thin film) 3375, 2966, 2930, 1637, 1525, 1449, 1361, 1297, 1238, 1223, 1198, 907  $\text{cm}^{-1}$ ; HRMS  $[\text{M}+\text{H}]^+$  Calculated for  $\text{C}_9\text{H}_{19}\text{NO}$  158.1545, found 158.1543.

### **Adamantane-1-carboxylic acid tert-butylamide (23)**

Following the general procedure, compound **23** was isolated in 72% yield (33.8 mg).  $^1\text{H}$  NMR (500 MHz,  $\text{CDCl}_3$ ),  $\delta$  5.38 (s, 1H), 2.05 (m, 3H), 1.84 (m, 6H), 1.74 (m, 6H), 1.36 (s, 9H);  $^{13}\text{C}$  NMR (125 MHz,  $\text{CDCl}_3$ ),  $\delta$  178.8, 51.9, 42.3, 40.8, 38.0, 30.2, 29.6; IR (thin

film) 3332, 2957, 2910, 2849, 1732, 1635, 1533, 1445, 1359, 1287, 1229, 1177, 1105, 912  $\text{cm}^{-1}$ ; HRMS  $[\text{M}+\text{H}]^+$  Calculated for  $\text{C}_{15}\text{H}_{25}\text{NO}$  236.2014, found 236.2025.

#### **N-phenylcinnamamide (24)**

Following the general procedure, compound **24** was isolated in 86% yield (38.3 mg).  $^1\text{H}$  NMR (500 MHz,  $\text{CDCl}_3$ ),  $\delta$  7.81 (d,  $J = 15.5$  Hz, 1H), 7.66 (m, 2H), 7.58 (m, 2H), 7.44-7.38 (m, 6H), 7.18 (m, 1H), 6.59 (d,  $J = 15.5$  Hz, 1H);  $^{13}\text{C}$  NMR (125 MHz,  $\text{CDCl}_3$ ),  $\delta$  164.2, 142.4, 138.1, 134.6, 129.9, 129.1, 128.8, 128.0, 124.4, 120.9, 120.1; IR (thin film) 3273, 3060, 1661, 1622, 1596, 1542, 1498, 1441, 1343, 1295, 1246, 1184, 988, 976, 904, 862  $\text{cm}^{-1}$ ; HRMS  $[\text{M}+\text{H}]^+$  Calculated for  $\text{C}_{15}\text{H}_{13}\text{NO}$  224.1075, found 224.1070.

#### **N-tert-butylbenzamide (25)**

Following the general procedure, compound **25** was isolated in 83% yield (29.4 mg).  $^1\text{H}$  NMR (500 MHz,  $\text{CDCl}_3$ ),  $\delta$  7.53 (m, 2H), 7.29 (m, 1H), 7.21 (m, 2H), 5.74 (s, 1H), 1.29 (s, 9H);  $^{13}\text{C}$  NMR (125 MHz,  $\text{CDCl}_3$ ),  $\delta$  166.9, 135.9, 131.0, 128.4, 126.7, 51.6, 28.9; IR (thin film) 3320, 2976, 1634, 1533, 1490, 1451, 1362, 1312, 1217, 1027, 936, 876  $\text{cm}^{-1}$ ; HRMS  $[\text{M}+\text{H}]^+$  Calculated for  $\text{C}_{11}\text{H}_{15}\text{NO}$  178.1232, found 178.1228.

#### **(R)-benzyl 2-(tert-butoxycarbonylamino)-4-(tert-butylamino)-4-oxobutanoate (26)**

Following the general procedure, compound **26** was isolated in 77% yield (58.2 mg).  $^1\text{H}$  NMR (500 MHz,  $\text{CDCl}_3$ ),  $\delta$  7.37 (m, 5H), 5.86 (d,  $J = 8.3$  Hz, 1H), 5.35 (s, 1H), 5.26 (d,  $J = 12.4$  Hz, 1H), 5.18 (d,  $J = 12.4$  Hz, 1H), 4.54 (m, 1H), 2.85 (dd,  $J = 4.8$  Hz,  $J = 16.1$  Hz, 1H), 2.67 (dd,  $J = 3.9$  Hz,  $J = 15.4$  Hz, 1H), 1.45 (s, 9H), 1.32 (s, 9H);  $^{13}\text{C}$  NMR (125 MHz,  $\text{CDCl}_3$ ),  $\delta$  171.5, 169.1, 155.8, 135.5, 128.5, 128.2, 128.0, 79.8, 67.2, 60.4, 51.5, 50.7, 38.6, 28.7, 28.3; IR (thin film) 3339, 2974, 2933, 1741, 1715, 1654, 1540, 1497, 1455, 1366, 1253, 1223, 1166, 1053, 1026  $\text{cm}^{-1}$ ; HRMS  $[\text{M}+\text{Na}]^+$  Calculated for  $\text{C}_{20}\text{H}_{30}\text{N}_2\text{O}_5$  401.2052, found 401.2056.

#### **N-tert-butylcinnamamide (27)**

Following the general procedure, compound **27** was isolated in 81% yield (32.9 mg).  $^1\text{H}$  NMR (500 MHz,  $\text{CDCl}_3$ ),  $\delta$  7.39 (d,  $J = 15.6$  Hz, 1H), 7.29 (m, 2H), 7.16 (m, 3H), 6.15

(d,  $J = 15.6$  Hz, 1H), 5.26 (s, 1H), 1.25 (s, 9H);  $^{13}\text{C}$  NMR (125 MHz,  $\text{CDCl}_3$ ),  $\delta$  166.8, 141.5, 136.5, 130.8, 130.2, 129.1, 123.6, 52.9, 30.3; IR (thin film) 3289, 2966, 1655, 1617, 1545, 1448, 1342, 1246, 1224, 1213, 986, 977  $\text{cm}^{-1}$ ; HRMS  $[\text{M}+\text{H}]^+$  Calculated for  $\text{C}_{13}\text{H}_{17}\text{NO}$  204.1388, found 204.1392.

### **2,2-dimethyl-1-(pyrrolidin-1-yl)propan-1-one (28)**

Following the general procedure, compound **28** was isolated in 85% yield (26.3 mg).  $^1\text{H}$  NMR (500 MHz,  $\text{CDCl}_3$ ),  $\delta$  3.32 (brs, 4H), 1.63 (brs, 4H), 1.04 (s, 9H);  $^{13}\text{C}$  NMR (125 MHz,  $\text{CDCl}_3$ ),  $\delta$  176.4, 47.8, 38.9, 27.5, 23.0; IR (thin film) 2968, 2874, 1616, 1479, 1407, 1363, 1339, 1213, 1134, 1167, 948, 918  $\text{cm}^{-1}$ ; HRMS  $[\text{M}+\text{Na}]^+$  Calculated for  $\text{C}_9\text{H}_{17}\text{NO}$  178.1208, found 178.1201.

### **2,2-dimethyl-1-morpholinopropan-1-one (29)**

Following the general procedure, compound **29** was isolated in 79% yield (27.0 mg).  $^1\text{H}$  NMR (500 MHz,  $\text{CDCl}_3$ ),  $\delta$  3.48 (m, 8H), 1.09 (s, 9H);  $^{13}\text{C}$  NMR (125 MHz,  $\text{CDCl}_3$ ),  $\delta$  177.8, 68.3, 47.1, 40.0, 29.7; IR (thin film) 2965, 2859, 1613, 1416, 1271, 1260, 1186, 1104, 1018, 934, 841  $\text{cm}^{-1}$ ; HRMS  $[\text{M}+\text{H}]^+$  Calculated for  $\text{C}_9\text{H}_{17}\text{NO}_2$  172.1338, found 172.1332.

### **1-(1-adamantylcarbonyl)-Pyrrolidine (30)**

Following the general procedure, compound **30** was isolated in 82% yield (38.2 mg).  $^1\text{H}$  NMR (500 MHz,  $\text{CDCl}_3$ ),  $\delta$  3.60 (s, 4H), 2.05 (m, 9H), 1.85 (m, 4H), 1.76 (m, 6H);  $^{13}\text{C}$  NMR (125 MHz,  $\text{CDCl}_3$ ),  $\delta$  177.3, 49.5, 43.1, 39.6, 38.1, 29.8; IR (thin film) 2976, 2904, 2848, 1604, 1446, 1399, 1368, 1335, 1186, 1103, 976, 937  $\text{cm}^{-1}$ ; HRMS  $[\text{M}+\text{H}]^+$  Calculated for  $\text{C}_{15}\text{H}_{23}\text{NO}$  234.1858, found 234.1857.

### **4-(1-adamantylcarbonyl)-Morpholine (31)**

Following the general procedure, compound **31** was isolated in 80% yield (39.8 mg).  $^1\text{H}$  NMR (500 MHz,  $\text{CDCl}_3$ ),  $\delta$  3.72 (m, 8H), 2.07 (m, 3H), 2.02 (m, 6H), 1.78 (m, 6H);  $^{13}\text{C}$  NMR (125 MHz,  $\text{CDCl}_3$ ),  $\delta$  177.2, 68.4, 47.3, 43.0, 40.4, 38.0, 29.8; IR (thin film) 2903,

2849, 1623, 1447, 1402, 1258, 1227, 1115, 1022, 973, 940  $\text{cm}^{-1}$ ; HRMS  $[\text{M}+\text{H}]^+$   
Calculated for  $\text{C}_{15}\text{H}_{23}\text{NO}_2$  250.1807, found 250.1803.

**(E)-3-phenyl-1-(pyrrolidin-1-yl)prop-2-en-1-one (32)**

Following the general procedure, compound **32** was isolated in 83% yield (33.3 mg).  $^1\text{H}$  NMR (500 MHz,  $\text{CDCl}_3$ ),  $\delta$  7.73 (d,  $J = 12.9$  Hz, 1H), 7.56 (m, 2H), 7.39 (m, 3H), 6.76 (d,  $J = 12.9$  Hz, 1H), 3.66 (t,  $J = 5.7$  Hz, 2H), 3.62 (t,  $J = 5.8$  Hz, 2H), 2.04 (m, 2H), 1.94 (m, 2H);  $^{13}\text{C}$  NMR (125 MHz,  $\text{CDCl}_3$ ),  $\delta$  164.7, 141.7, 135.4, 129.5, 128.8, 127.8, 118.9, 53.4, 46.6, 46.0, 38.6, 26.1, 24.4; IR (thin film) 2971, 2873, 1650, 1603, 1451, 1427, 1339, 1227, 1044, 979, 853  $\text{cm}^{-1}$ ; HRMS  $[\text{M}+\text{H}]^+$  Calculated for  $\text{C}_{13}\text{H}_{15}\text{NO}$  202.1232, found 202.1228.

**phenyl(pyrrolidin-1-yl)methanone (33)**

Following the general procedure, compound **33** was isolated in 88% yield (30.8 mg).  $^1\text{H}$  NMR (500 MHz,  $\text{CDCl}_3$ ),  $\delta$  7.54 (m, 2H), 7.43 (m, 3H), 3.69 (t,  $J = 7.0$  Hz, 2H), 3.46 (t,  $J = 6.7$  Hz, 2H), 1.98 (m, 2H), 1.89 (m, 2H);  $^{13}\text{C}$  NMR (125 MHz,  $\text{CDCl}_3$ ),  $\delta$  169.7, 137.3, 129.7, 128.2, 127.1, 49.6, 46.1, 26.4, 24.4; IR (thin film) 2970, 2875, 1617, 1574, 1446, 1415, 1339, 1252, 1076, 1026, 926, 873, 841  $\text{cm}^{-1}$ ; HRMS  $[\text{M}+\text{H}]^+$  Calculated for  $\text{C}_{11}\text{H}_{13}\text{NO}$  176.1075, found 176.1073.

**morpholino(phenyl)methanone (34)**

Following the general procedure, compound **34** was isolated in 82% yield (31.4 mg).  $^1\text{H}$  NMR (500 MHz,  $\text{CDCl}_3$ ),  $\delta$  7.44 (m, 5H), 3.79-3.47 (m, 8H);  $^{13}\text{C}$  NMR (125 MHz,  $\text{CDCl}_3$ ),  $\delta$  170.4, 135.3, 129.9, 128.5, 127.1, 66.9, 43.1; IR (thin film) 2855, 1628, 1426, 1277, 1257, 1112, 1067, 1016, 933, 841  $\text{cm}^{-1}$ ; HRMS  $[\text{M}+\text{Na}]^+$  Calculated for  $\text{C}_{11}\text{H}_{13}\text{NO}_2$  214.0841, found 214.0837.

**(R)-benzyl 2-(tert-butoxycarbonylamino)-4-oxo-4-(pyrrolidin-1-yl)butanoate (35)**

Following the general procedure, compound **35** was isolated in 85% yield (63.9 mg).  $^1\text{H}$  NMR (500 MHz,  $\text{CDCl}_3$ ),  $\delta$  7.24 (m, 5H), 5.86 (d,  $J = 9.2$  Hz, 1H), 5.13 (d,  $J = 12.5$  Hz, 1H), 5.07 (d,  $J = 12.5$  Hz, 1H), 4.52 (m, 1H), 3.34 (t,  $J = 6.9$  Hz, 2H), 3.27 (t,  $J = 6.8$  Hz,

2H), 3.01 (dd,  $J = 3.9$  Hz,  $J = 16.7$  Hz, 1H), 2.64 (dd,  $J = 4.1$  Hz,  $J = 16.7$  Hz, 1H), 1.86 (m, 2H), 1.77 (m, 2H) 1.45 (s, 9H);  $^{13}\text{C}$  NMR (125 MHz,  $\text{CDCl}_3$ ),  $\delta$  171.7, 168.6, 155.9, 135.8, 128.4, 128.0, 127.9, 79.4, 67.1, 50.2, 46.5, 45.5, 36.8, 28.3, 25.9, 24.3; IR (thin film) 3427, 2974, 2876, 1712, 1635, 1495, 1449, 1366, 1215, 1161, 1054, 1025, 862  $\text{cm}^{-1}$ ; HRMS  $[\text{M}+\text{Na}]^+$  Calculated for  $\text{C}_{20}\text{H}_{28}\text{N}_2\text{O}_5$  399.1909, found 399.1903.

**(R)-benzyl 2-(tert-butoxycarbonylamino)-4-morpholino-4-oxobutanoate (36)**

Following the general procedure, compound **36** was isolated in 81% yield (63.5 mg).  $^1\text{H}$  NMR (500 MHz,  $\text{CDCl}_3$ ),  $\delta$  7.37 (m, 5H), 5.83 (d,  $J = 9.0$  Hz, 1H), 5.26 (d,  $J = 12.4$  Hz, 1H), 5.17 (d,  $J = 12.4$  Hz, 1H), 4.65 (m, 1H), 3.68 (m, 6H), 3.43 (m, 2H), 3.17 (dd,  $J = 4.0$  Hz,  $J = 16.6$  Hz, 1H), 2.81 (dd,  $J = 4.0$  Hz,  $J = 16.6$  Hz, 1H), 1.45 (s, 9H);  $^{13}\text{C}$  NMR (125 MHz,  $\text{CDCl}_3$ ),  $\delta$  171.4, 168.7, 155.8, 135.6, 128.4, 128.2, 128.0, 79.8, 67.1, 66.7, 66.4, 50.1, 45.7, 41.8, 35.4, 28.3; IR (thin film) 3433, 3332, 2975, 2929, 1741, 1712, 1640, 1495, 1455, 1366, 1273, 1236, 1163, 1115, 1056, 1028, 975  $\text{cm}^{-1}$ ; HRMS  $[\text{M}+\text{Na}]^+$  Calculated for  $\text{C}_{20}\text{H}_{28}\text{N}_2\text{O}_6$  415.1845, found 415.1847.

**(E)-1-morpholino-3-phenylprop-2-en-1-one (37)**

Following the general procedure, compound **37** was isolated in 86% yield (37.3 mg).  $^1\text{H}$  NMR (500 MHz,  $\text{CDCl}_3$ ),  $\delta$  7.74 (d,  $J = 15.4$  Hz, 1H), 7.56 (m, 2H), 7.41 (m, 3H), 6.88 (d,  $J = 15.4$  Hz, 1H), 3.76-3.69 (m, 8H);  $^{13}\text{C}$  NMR (125 MHz,  $\text{CDCl}_3$ ),  $\delta$  165.6, 143.2, 135.1, 129.8, 128.8, 127.9, 116.6, 66.8, 60.4, 46.5, 43.1, 38.6; IR (thin film) 2964, 2898, 2855, 1646, 1599, 1495, 1455, 1428, 1263, 1227, 1201, 1113, 1043, 976, 881, 844  $\text{cm}^{-1}$ ; HRMS  $[\text{M}+\text{H}]^+$  Calculated for  $\text{C}_{13}\text{H}_{15}\text{NO}_2$  218.1181, found 218.1176.

**(S)-isopropyl 2-(((9H-fluoren-9-yl)methoxy)carbonylamino)propanoate (38)**

Following the general procedure, compound **38** was isolated in 43% yield (30.3 mg).  $^1\text{H}$  NMR (500 MHz,  $\text{CDCl}_3$ ),  $\delta$  7.70 (m, 2H), 7.54 (m, 2H), 7.34 (m, 2H), 7.26 (m, 2H), 5.30 (d,  $J = 7.2$  Hz, 1H), 5.01 (m, 1H), 4.33 (m, 3H), 4.17 (t,  $J = 7.1$  Hz, 1H), 1.36 (d,  $J = 7.1$  Hz, 3H), 1.19 (m, 6H);  $^{13}\text{C}$  NMR (125 MHz,  $\text{CDCl}_3$ ),  $\delta$  172.6, 155.6, 143.9, 143.8, 141.32, 141.30, 127.7, 127.1, 125.14, 125.10, 119.9, 69.1, 66.9, 49.8, 47.2, 21.7, 21.6, 18.8; IR (thin film) 3338, 2980, 2937, 1718, 1524, 1450, 1375, 1330, 1247, 1212, 1105,



1073, 1034, 940  $\text{cm}^{-1}$ ; HRMS  $[\text{M}+\text{Na}]^+$  Calculated for  $\text{C}_{21}\text{H}_{23}\text{NO}_4$  376.1522, found 376.1525.

**(S)-1-benzyl 4-isopropyl 2-(tert-butoxycarbonylamino)succinate (39)**

Following the general procedure, compound **39** was isolated in 64% yield (46.7 mg).  $^1\text{H}$  NMR (500 MHz,  $\text{CDCl}_3$ ),  $\delta$  7.29 (m, 5H), 5.43 (d,  $J = 8.1$  Hz, 1H), 5.15 (d,  $J = 12.3$  Hz, 1H), 5.08 (d,  $J = 12.3$  Hz, 1H), 4.92 (m, 1H), 4.55 (m, 1H), 2.92 (dd,  $J = 4.3$  Hz,  $J = 16.8$  Hz, 1H), 2.73 (m, 1H), 1.45 (s, 9H), 1.13 (m, 6H);  $^{13}\text{C}$  NMR (125 MHz,  $\text{CDCl}_3$ ),  $\delta$  171.0, 170.3, 155.4, 135.3, 128.5, 128.3, 128.1, 80.0, 68.6, 67.3, 50.1, 37.0, 28.3, 21.7; IR (thin film) 3374, 2979, 2936, 1718, 1498, 1368, 1340, 1211, 1162, 1106, 1051, 1025, 976  $\text{cm}^{-1}$ ; HRMS  $[\text{M}+\text{Na}]^+$  Calculated for  $\text{C}_{19}\text{H}_{27}\text{NO}_6$  388.1733, found 388.1732.

**(S)-methyl 2-(2-(((9H-fluoren-9-yl)methoxy)carbonylamino)-N,2-dimethylpropanamido)-3-methylbutanoate (46)**

To a  $\text{CH}_2\text{Cl}_2$  (1.0 mL) solution of thio acid **40** (0.10 mmol) were added t-butyl isonitrile (0.20 mmol) and N-methyl valine **41** (0.30 mmol). This reaction mixture was stirred at room temperature for 30 mins and  $\text{CH}_2\text{Cl}_2$  was removed under vacuum. The residue was purified by flash column chromatography and acid **45** was isolated in 75% yield (32.9 mg). Then, to a THF/MeOH (1.0 mL, 3:1/v:v) solution of acid **45** (0.05 mmol) was added  $\text{TMSCH}_2\text{N}_2$  (0.06 mmol). This reaction mixture was stirred at room temperature for 30 mins before quenching with acetic acid. After dilution with  $\text{CH}_2\text{Cl}_2$  (5.0 mL) and sequential washing with  $\text{NaHCO}_3$ (sat.) and brine, the organic layer was dried over  $\text{Na}_2\text{SO}_4$ . Then, after filtration,  $\text{CH}_2\text{Cl}_2$  was removed under vacuum. The residue was purified by flash column chromatography. Compound **46** was obtained in 90% yield (20.4 mg).  $^1\text{H}$  NMR (500 MHz,  $\text{CDCl}_3$ ),  $\delta$  7.79 (m, 2H), 7.62 (m, 2H), 7.44 (m, 2H), 7.34 (m, 2H), 5.59 (s, 1H), 4.83 (m, 1H), 4.46 (m, 2H), 4.23 (t,  $J = 6.5$  Hz, 1H), 3.71 (s, 3H), 3.06 (s, 3H), 2.27 (m, 1H), 1.63 (s, 3H), 1.61 (s, 3H), 1.04 (d,  $J = 11.5$  Hz, 3H), 0.90 (d,  $J = 12.5$  Hz, 3H);  $^{13}\text{C}$  NMR (125 MHz,  $\text{CDCl}_3$ ),  $\delta$  173.5, 171.6, 154.1, 143.9, 143.8, 141.4, 141.3, 127.6, 127.1, 124.9, 119.9, 66.1, 60.4, 57.3, 53.4, 51.8, 47.3, 31.6, 29.7, 25.4, 22.6, 20.0, 18.9; IR (thin film) 3303, 2964, 2931, 1727, 1628, 1525, 1466, 1450, 1394, 1253,

1210, 1105, 1081, 1015, 952, 910  $\text{cm}^{-1}$ ; HRMS  $[\text{M}+\text{Na}]^+$  Calculated for  $\text{C}_{26}\text{H}_{32}\text{N}_2\text{O}_5$   
475.2209, found 475.2204.

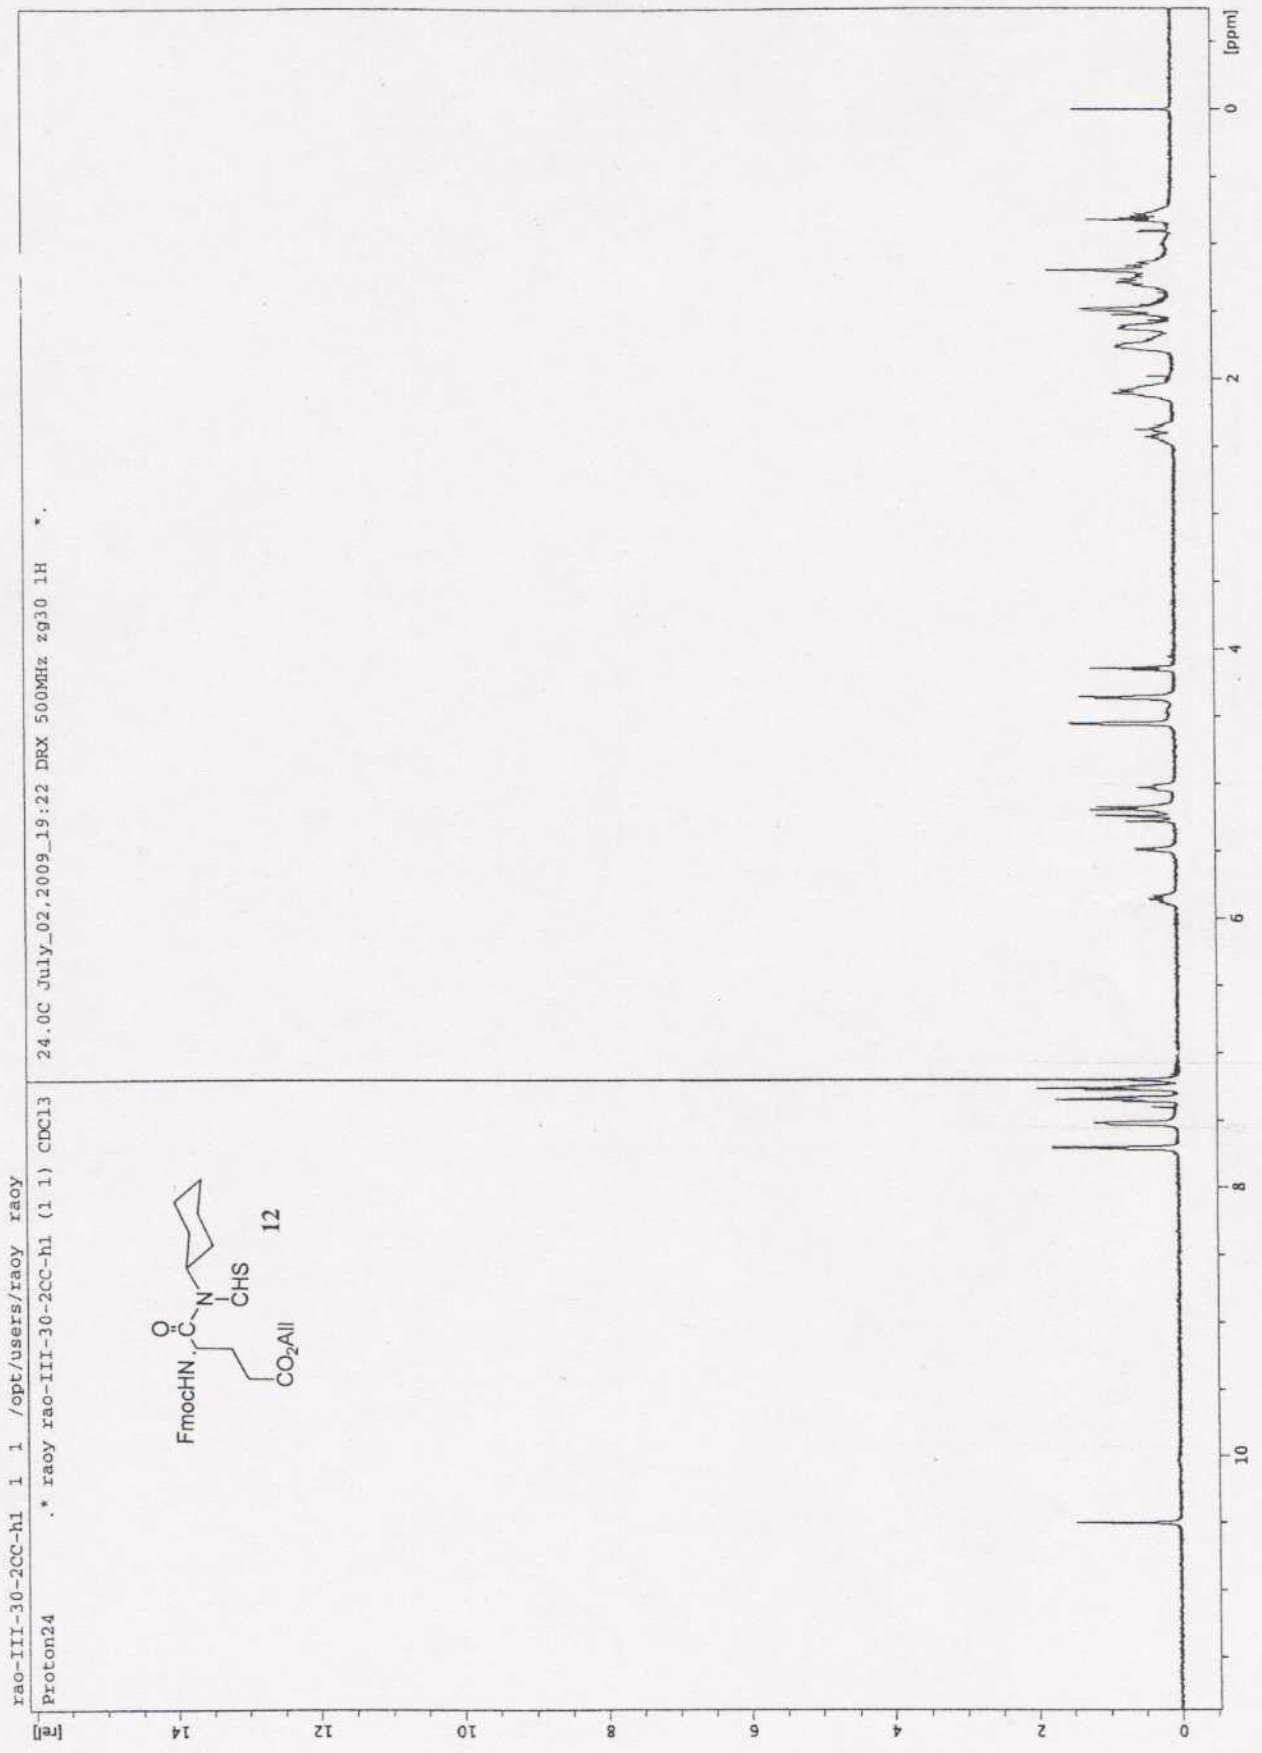

rao-III-30-2CC 10 1 /opt/users/raoy raoy  
.\* raoy rao-III-30-2CC (10 1) CDCl3 24.1C July\_03\_2009\_00:45:00 Bruker AVII+ 600MHz RRL1326: zqdg30 : 13C 110.000 ppm; 1H 4.500 ppm \*

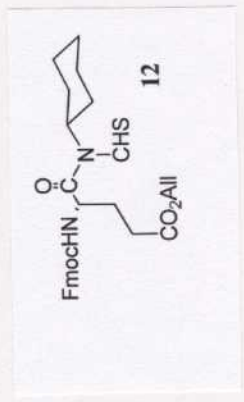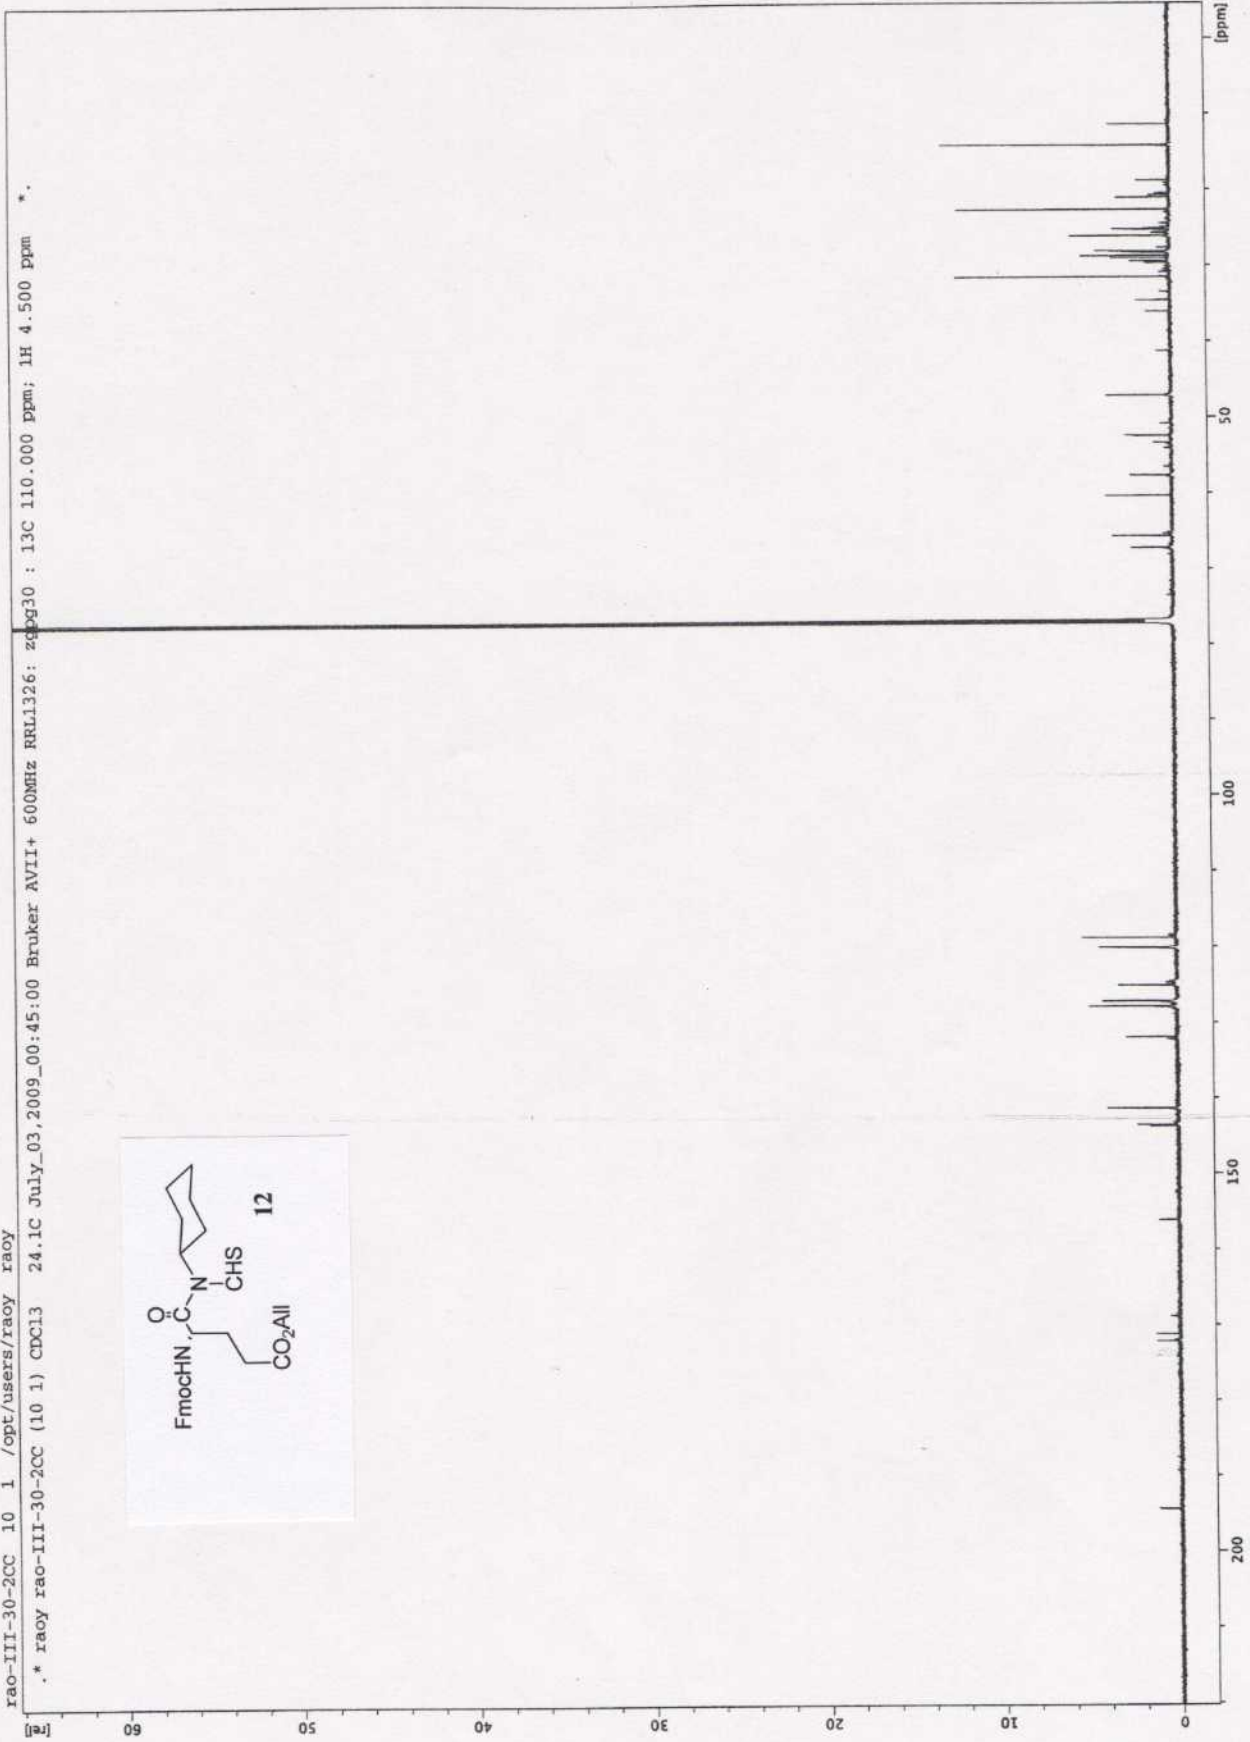

rao-III-30-3CC-H1 1 1 /opt/users/raoy raoy

\* raoy rao-III-30-3CC-H1 (1 1) CDCl3 24.0C July\_01\_2009\_15:57 DRX 500MHz zg30 1H

Proton24

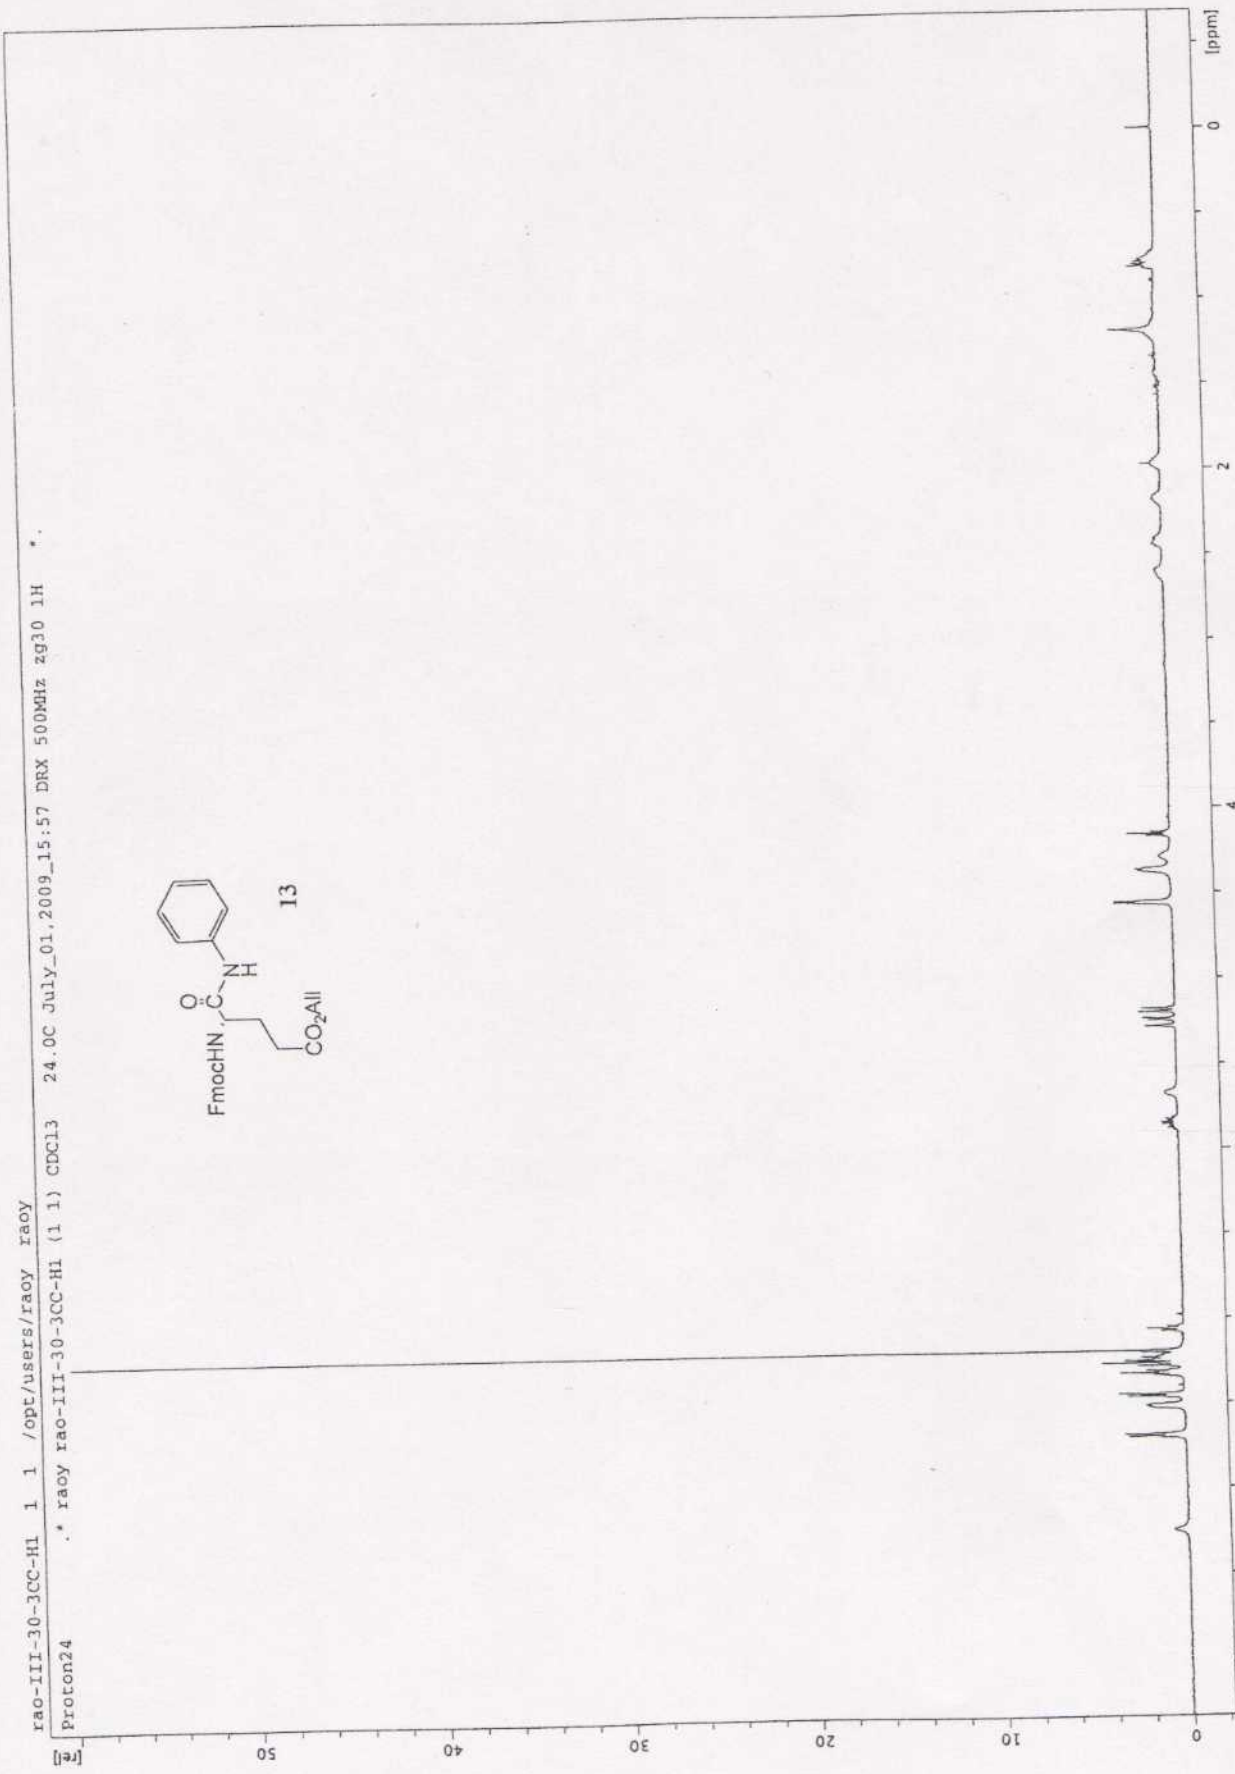

rao-III-30-3cc 10 1 /opt/users/raoy raoy  
\* raoy rao-III-30-3cc (10 1) CDCl3 24.1C July\_01,2009\_17:33:44 Bruker AVII+ 600MHz RRL1326: zgpg30 : 13C 110.000 ppm; 1H 4.500 ppm \*

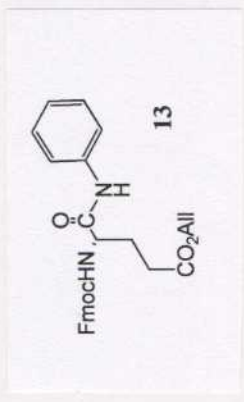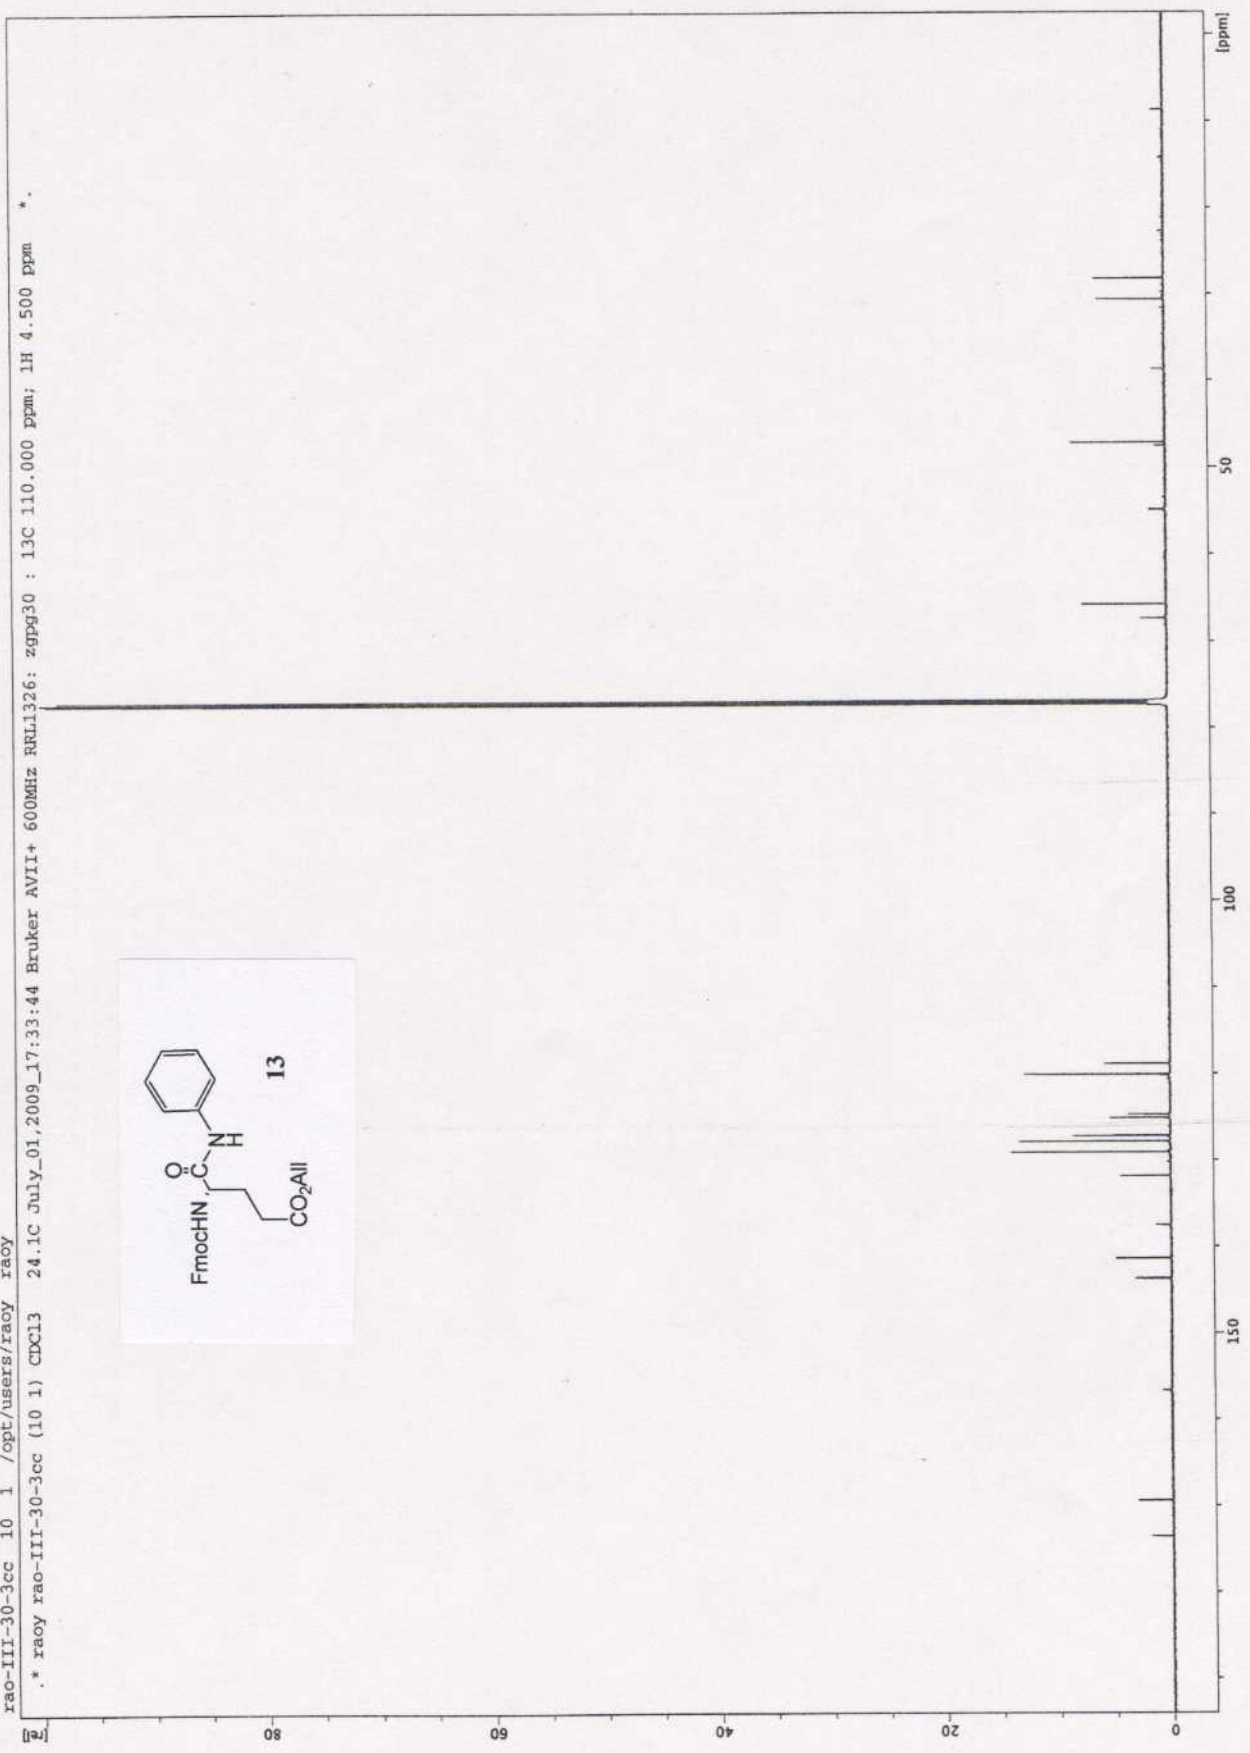

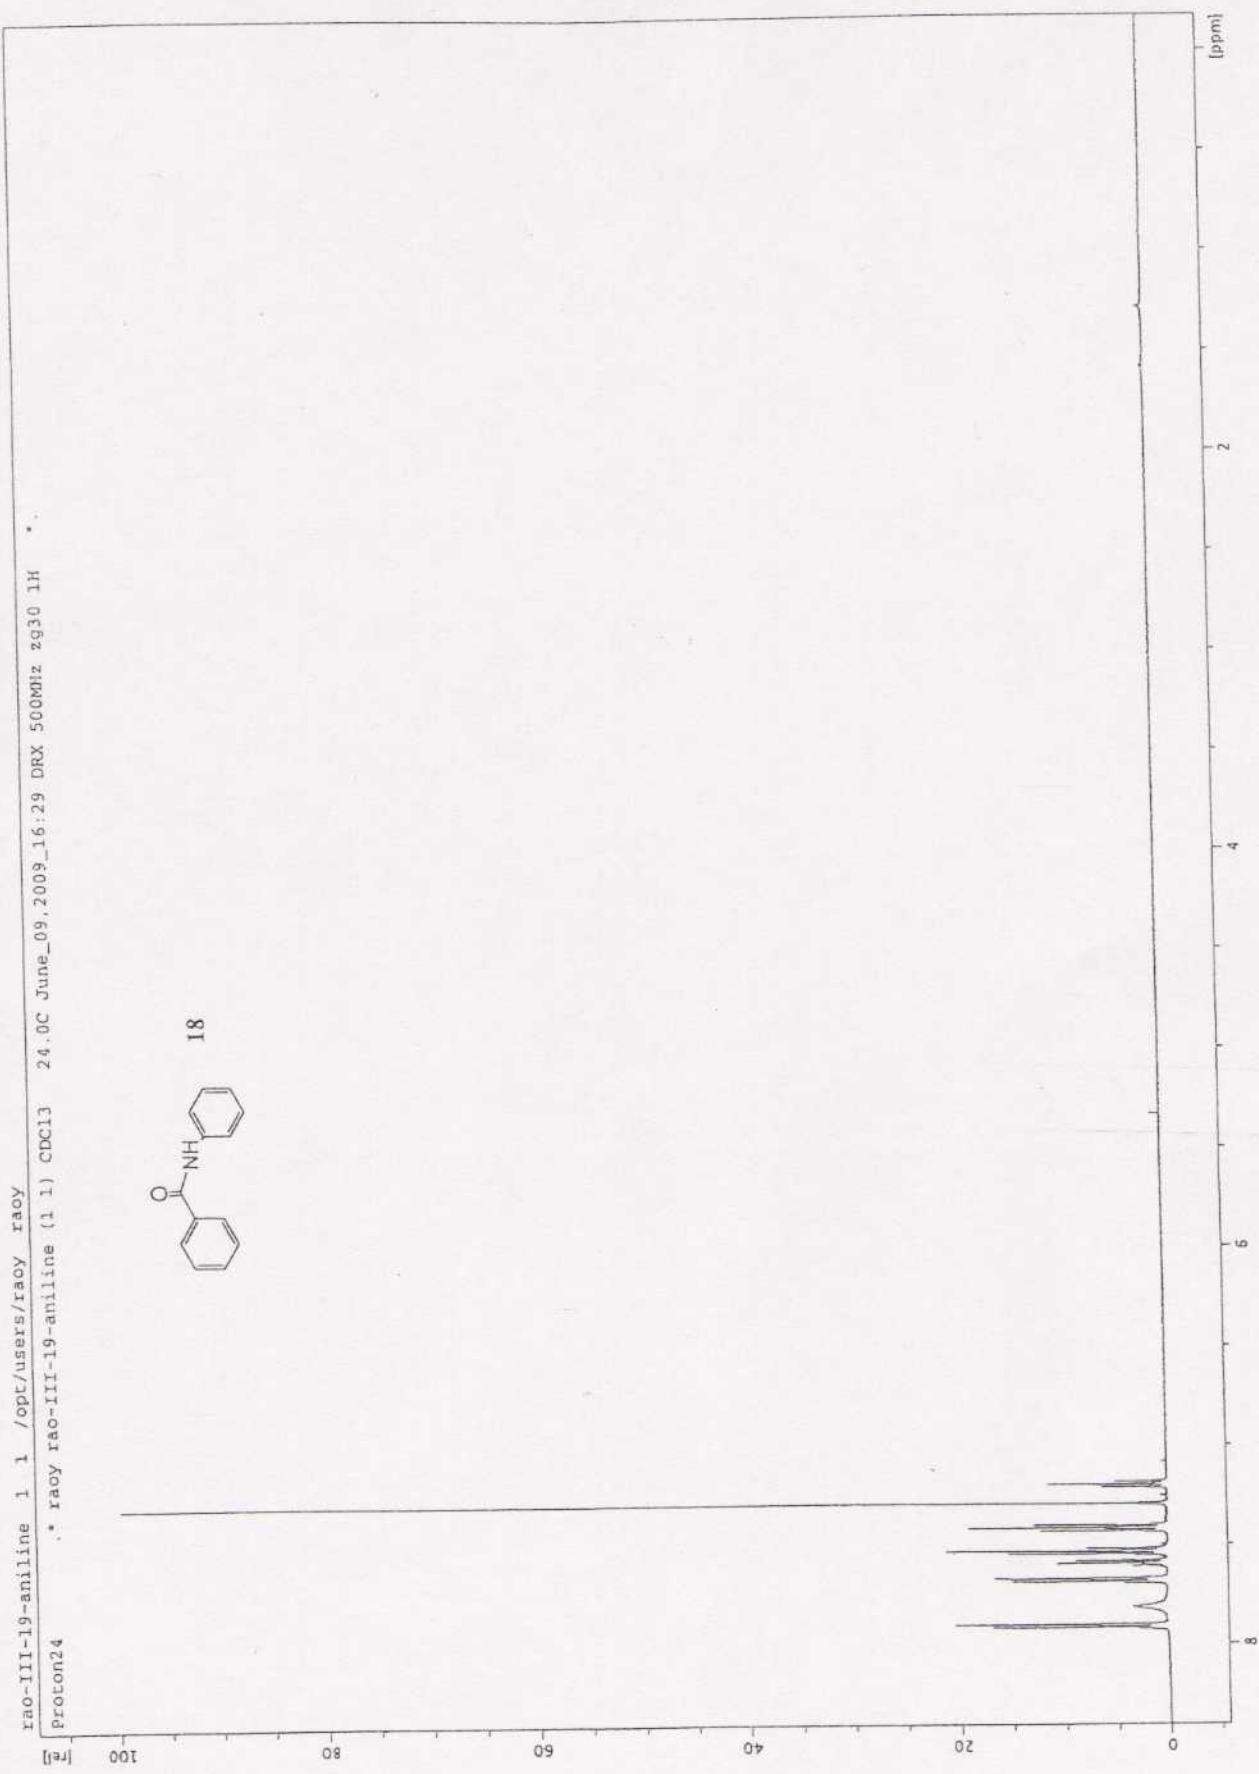

rao-III-19-Aniline 10 1 /opt/users/raoy raoy

.\* raoy rao-III-19-Aniline (10 1) CDCl3 24.1C June\_09\_2009\_20:28:49 Bruker AVII+ 600MHz RRL1326: zpgg30 : 13C 110.000 ppm; 1H 4.500 ppm \*

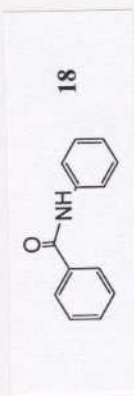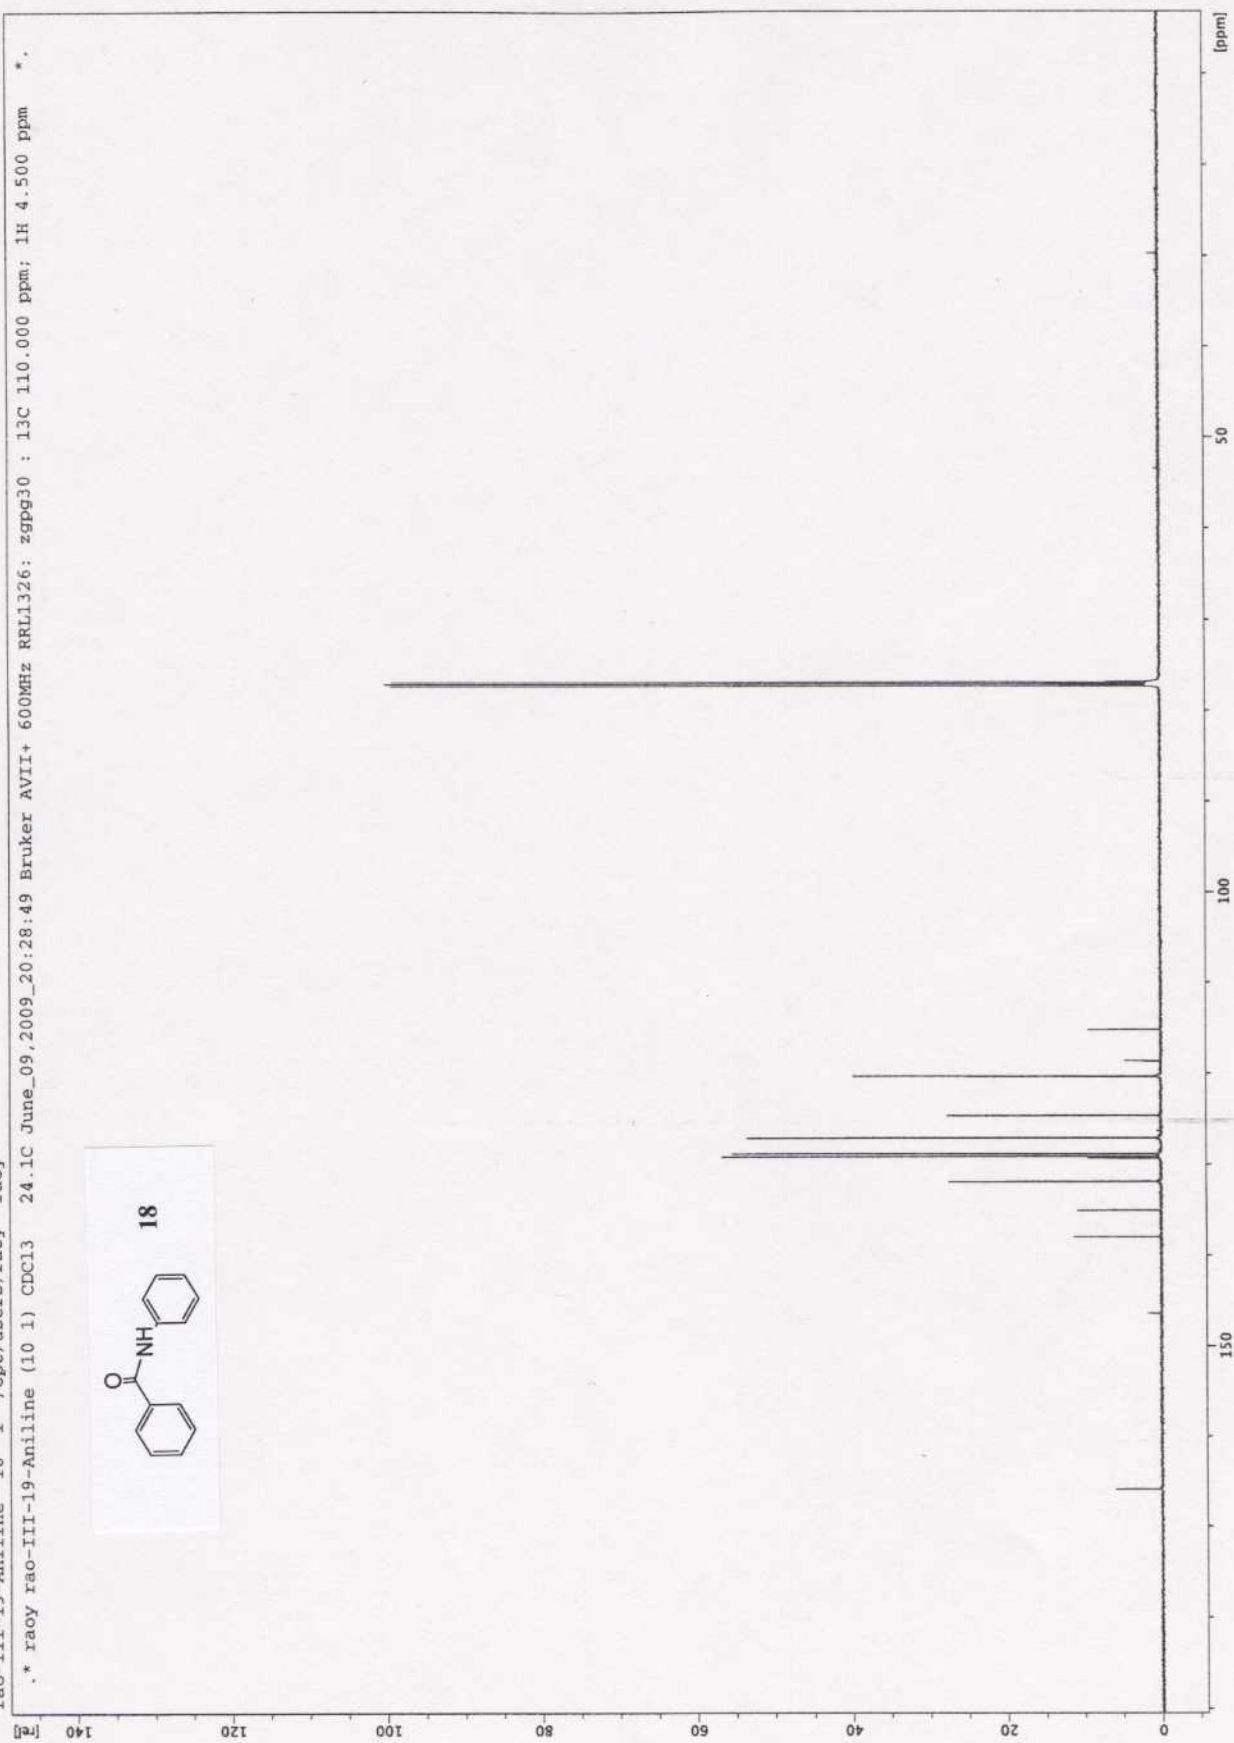



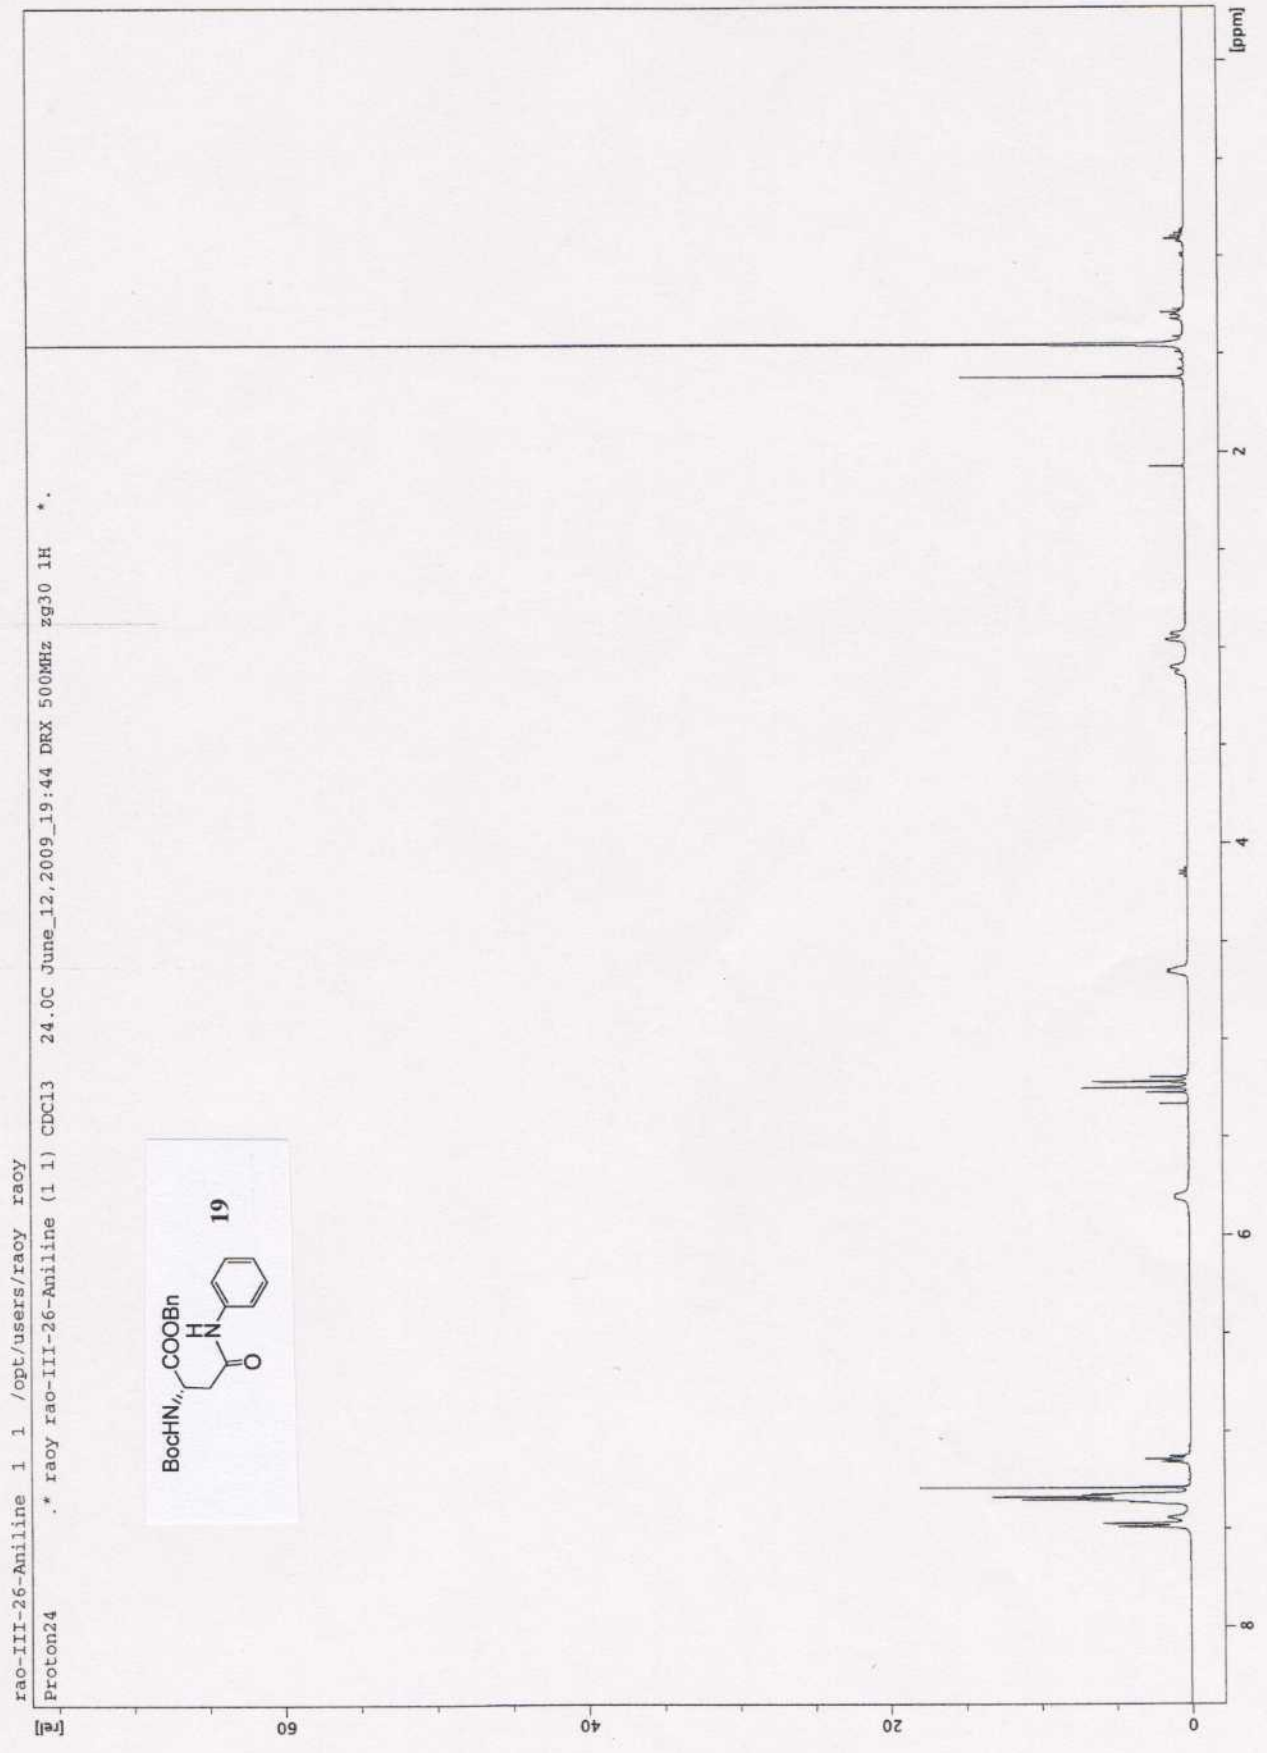

rao-III-26-Aniline-cl3 1 1 /opt/users/raoy raoy  
raol . \* raoy rao-III-26-Aniline-cl3 (1 1) MeOD 24.0C June\_13,2009\_12:08 DRX 500MHz zgpg30 13C; 1H O2=4.000 \*

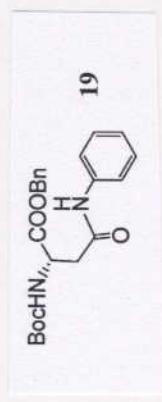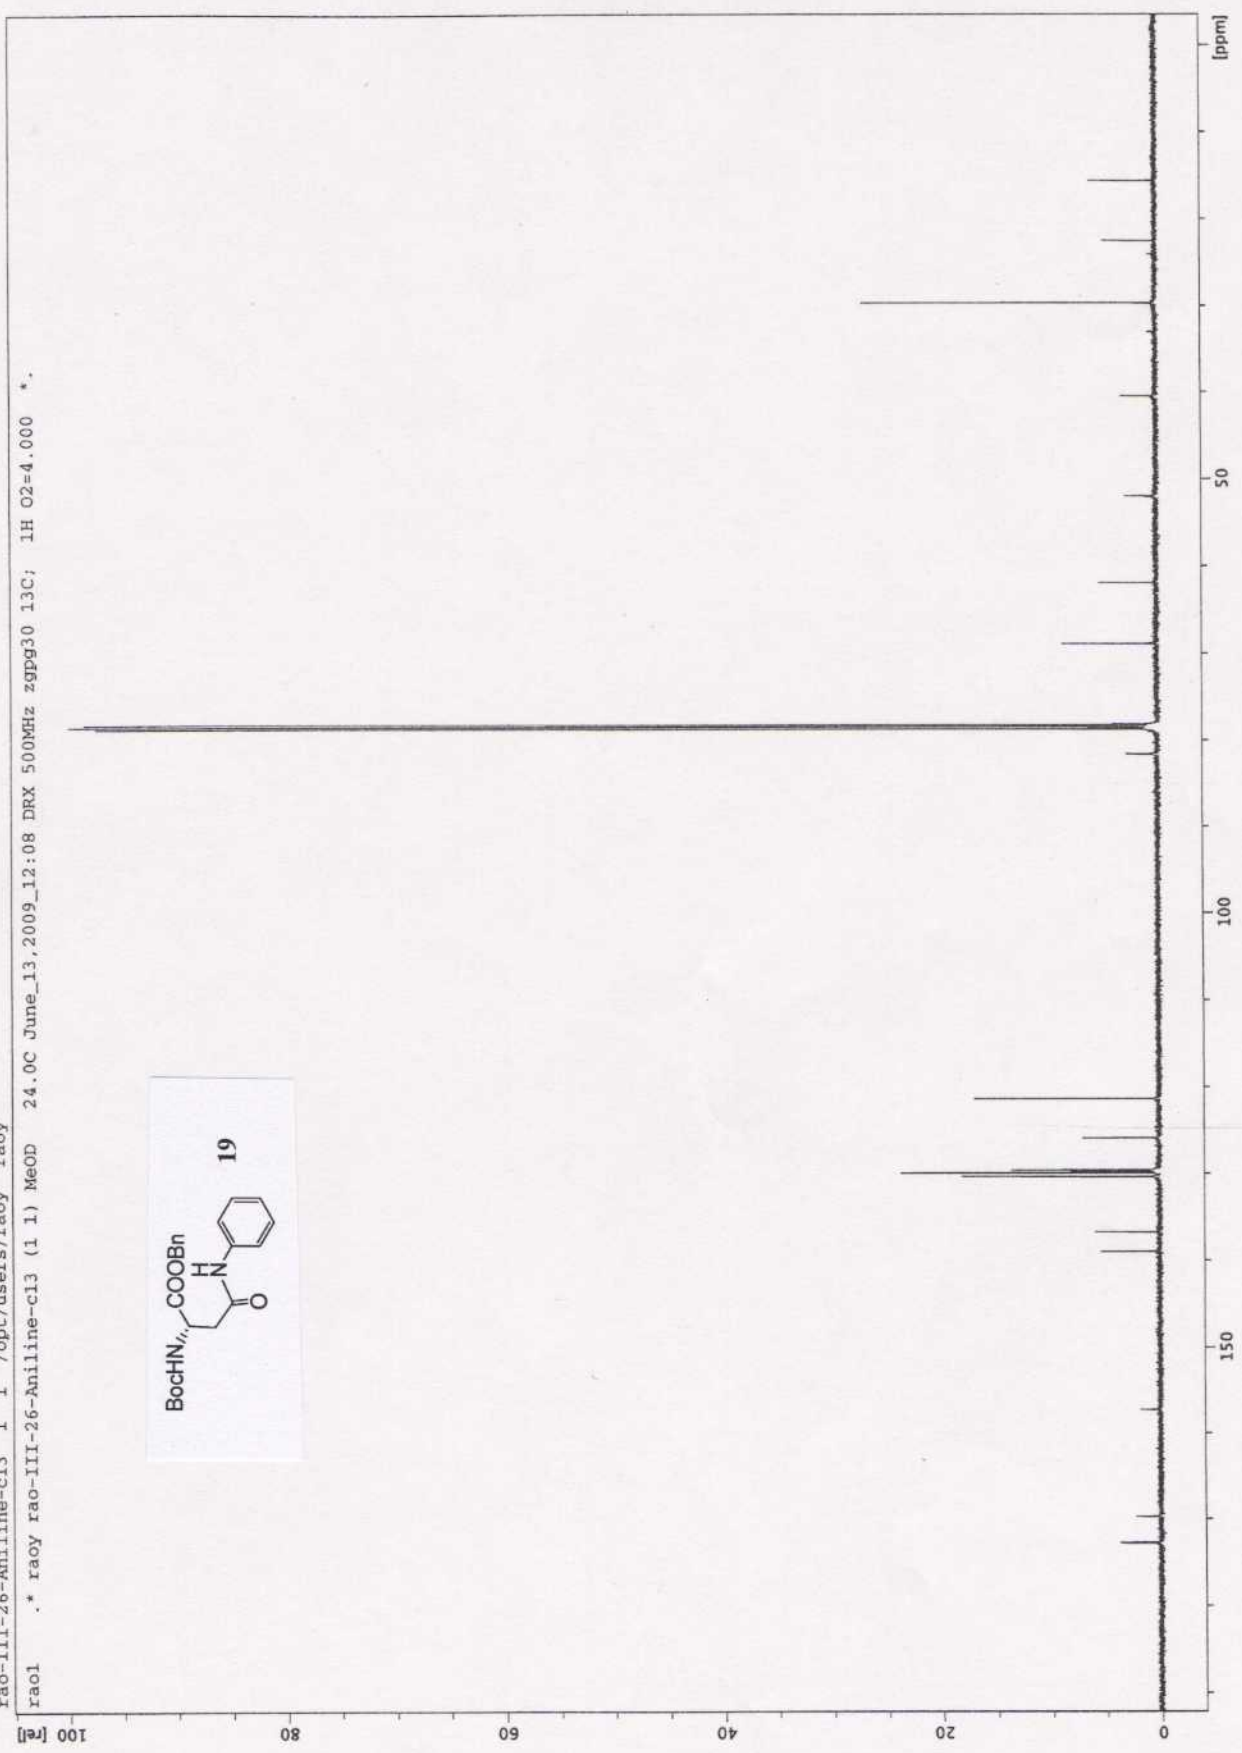

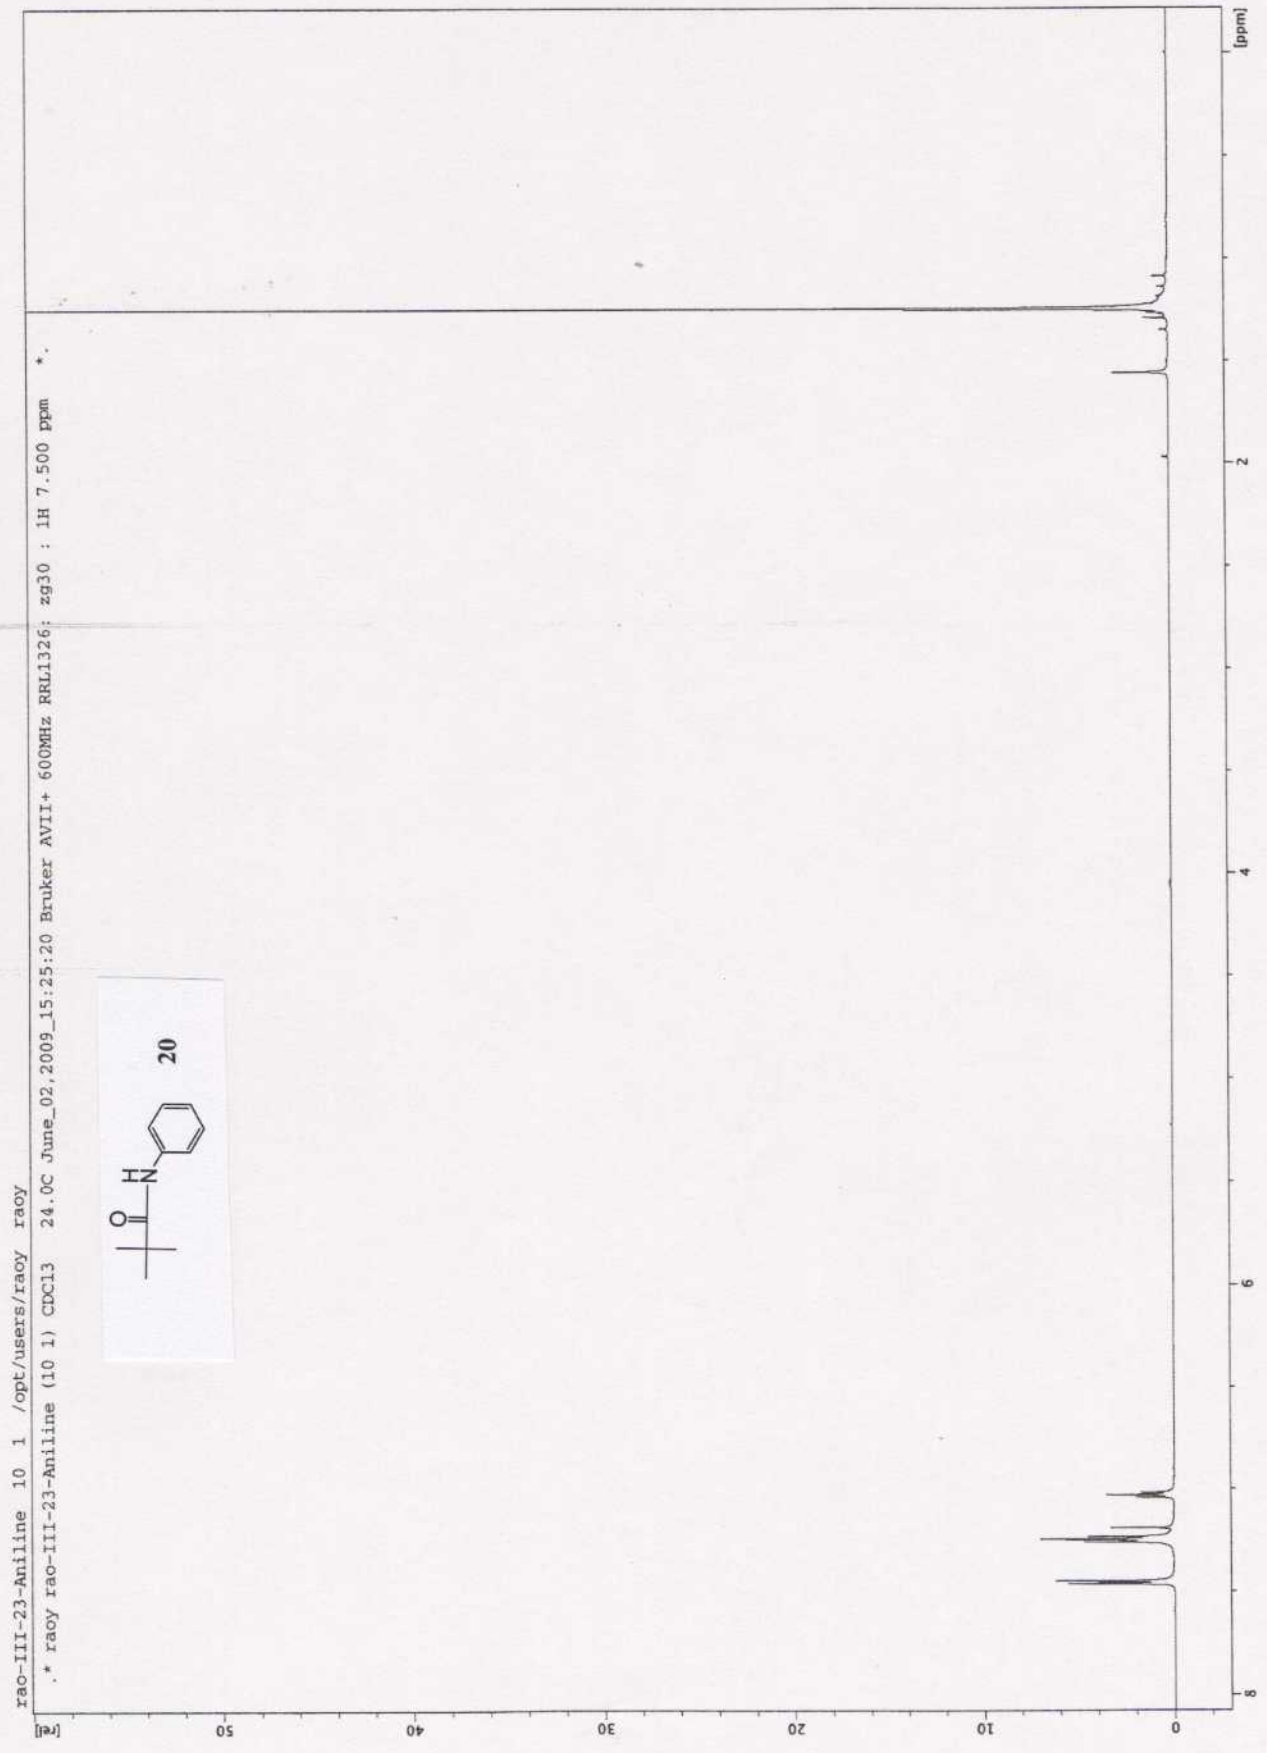

rao-III-23-aniline-C13 10 1 /opt/users/raoy raoy  
.\* raoy rao-III-23-aniline-C13 (10 1) CDCl3 24.1C June\_02\_2009\_17:13:47 Bruker AVII+ 600MHz RRL1326: zgpg30 : 13C 110.000 ppm; 1H 4.500 ppm \*

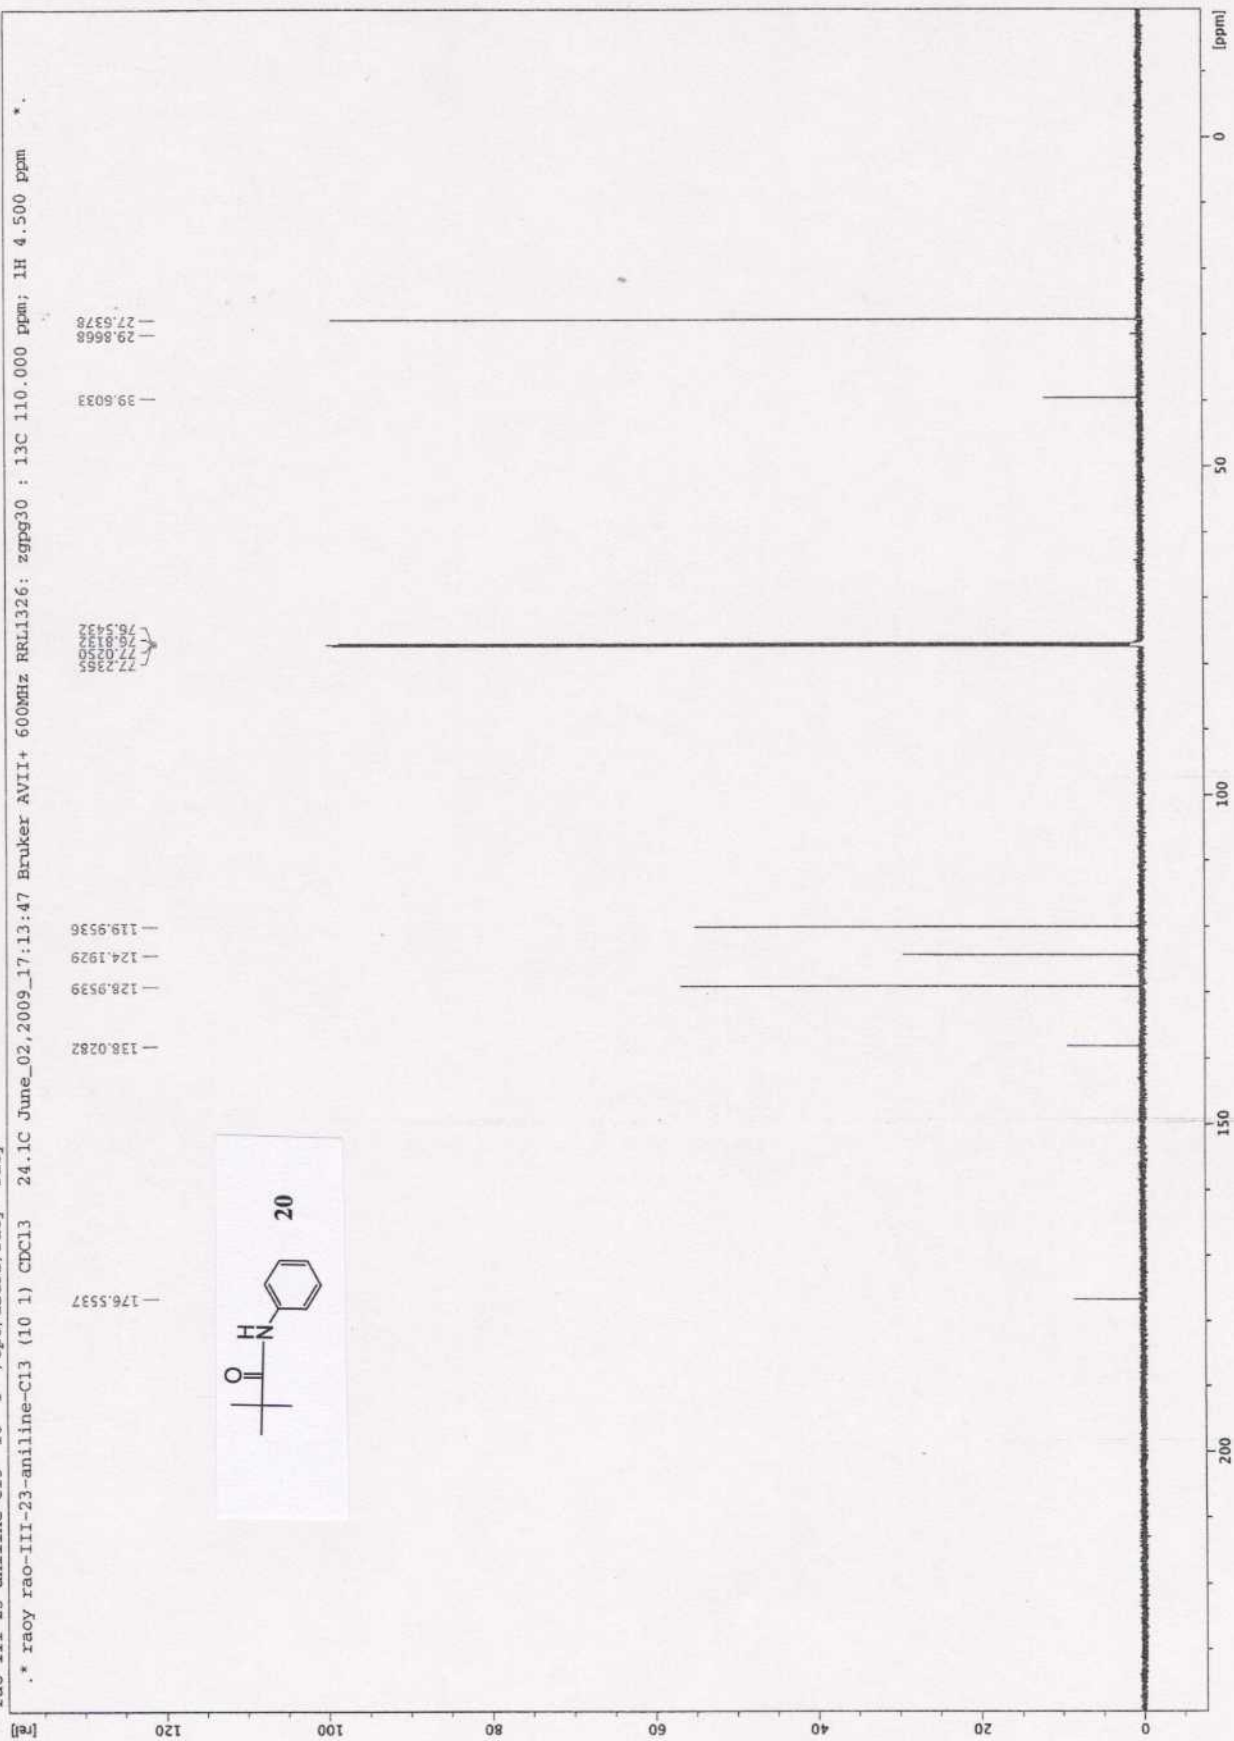

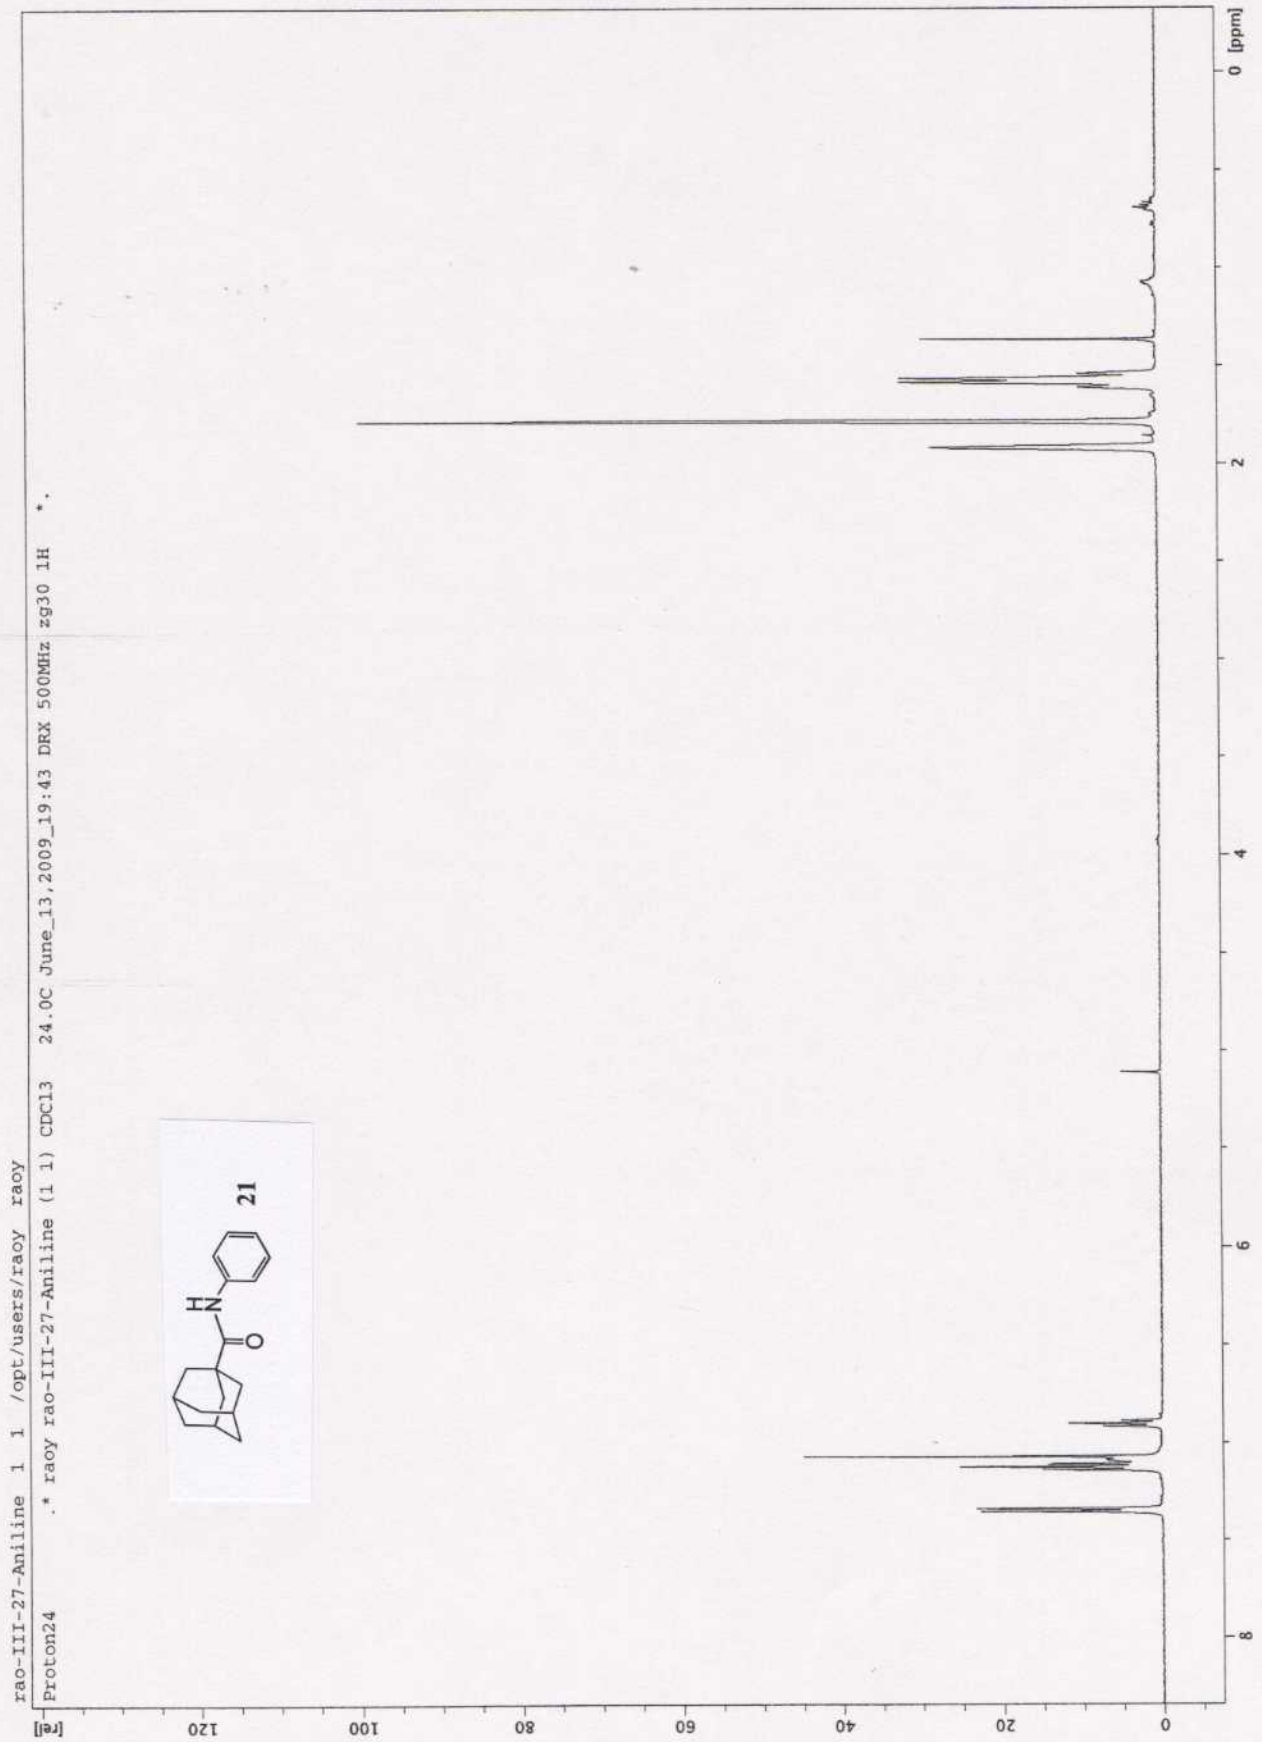

rao-III-27-Aniline-cl3 1 1 /opt/users/raoy raoy  
raol \* raoy rao-III-27-Aniline-cl3 (1 1) CDCl3 24.0C June\_13,2009\_21:00 DRX 500MHz zgpg30 13C; 1H Q2=4.000 \*

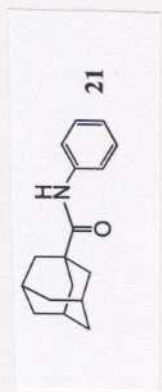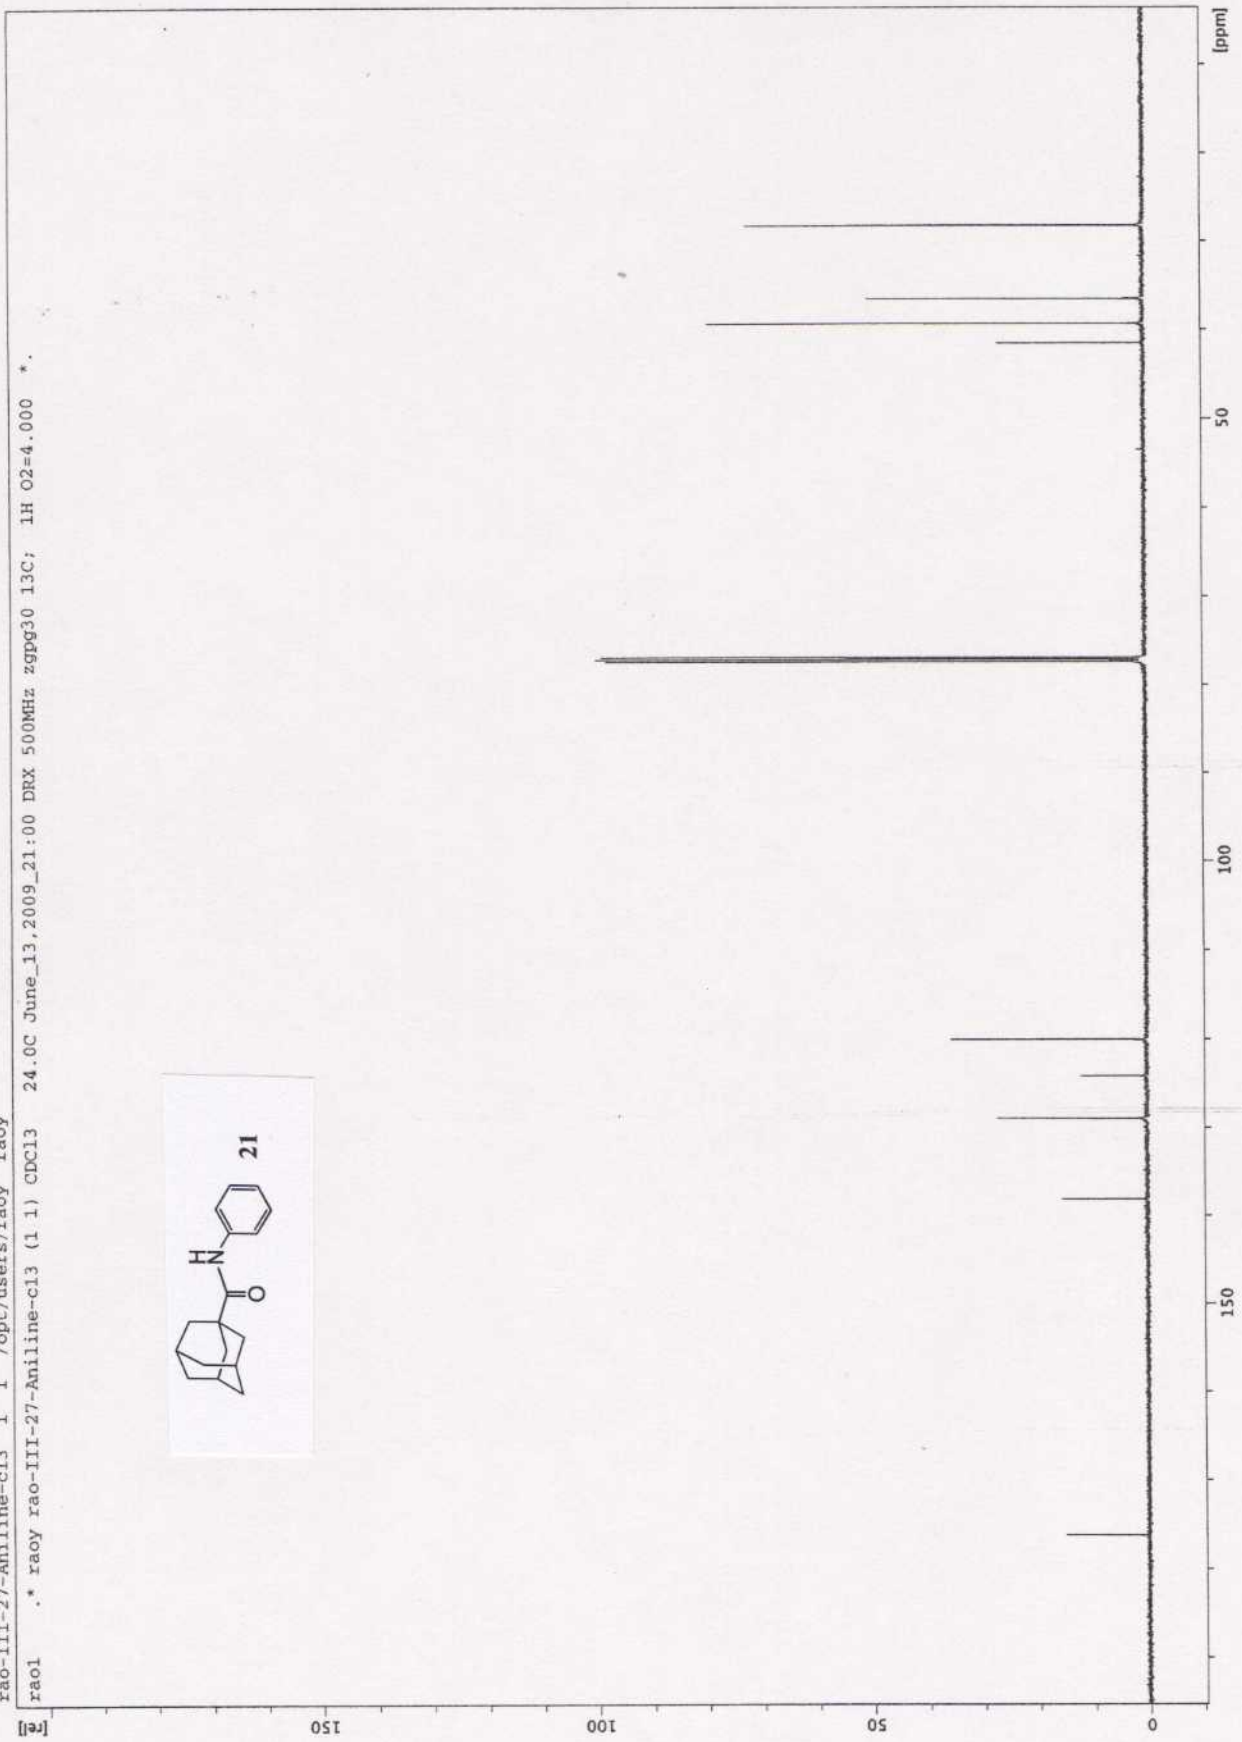

rao-III-23B-t-butyl\_amine\_2 1 1 /opt/users/raoy raoy

Proton24 . \* raoy rao-III-23B-t-butyl\_amine\_2 (1 1) CDC13

24.0C June\_15,2009\_03:06 DRX 500MHz zg30 1H \*

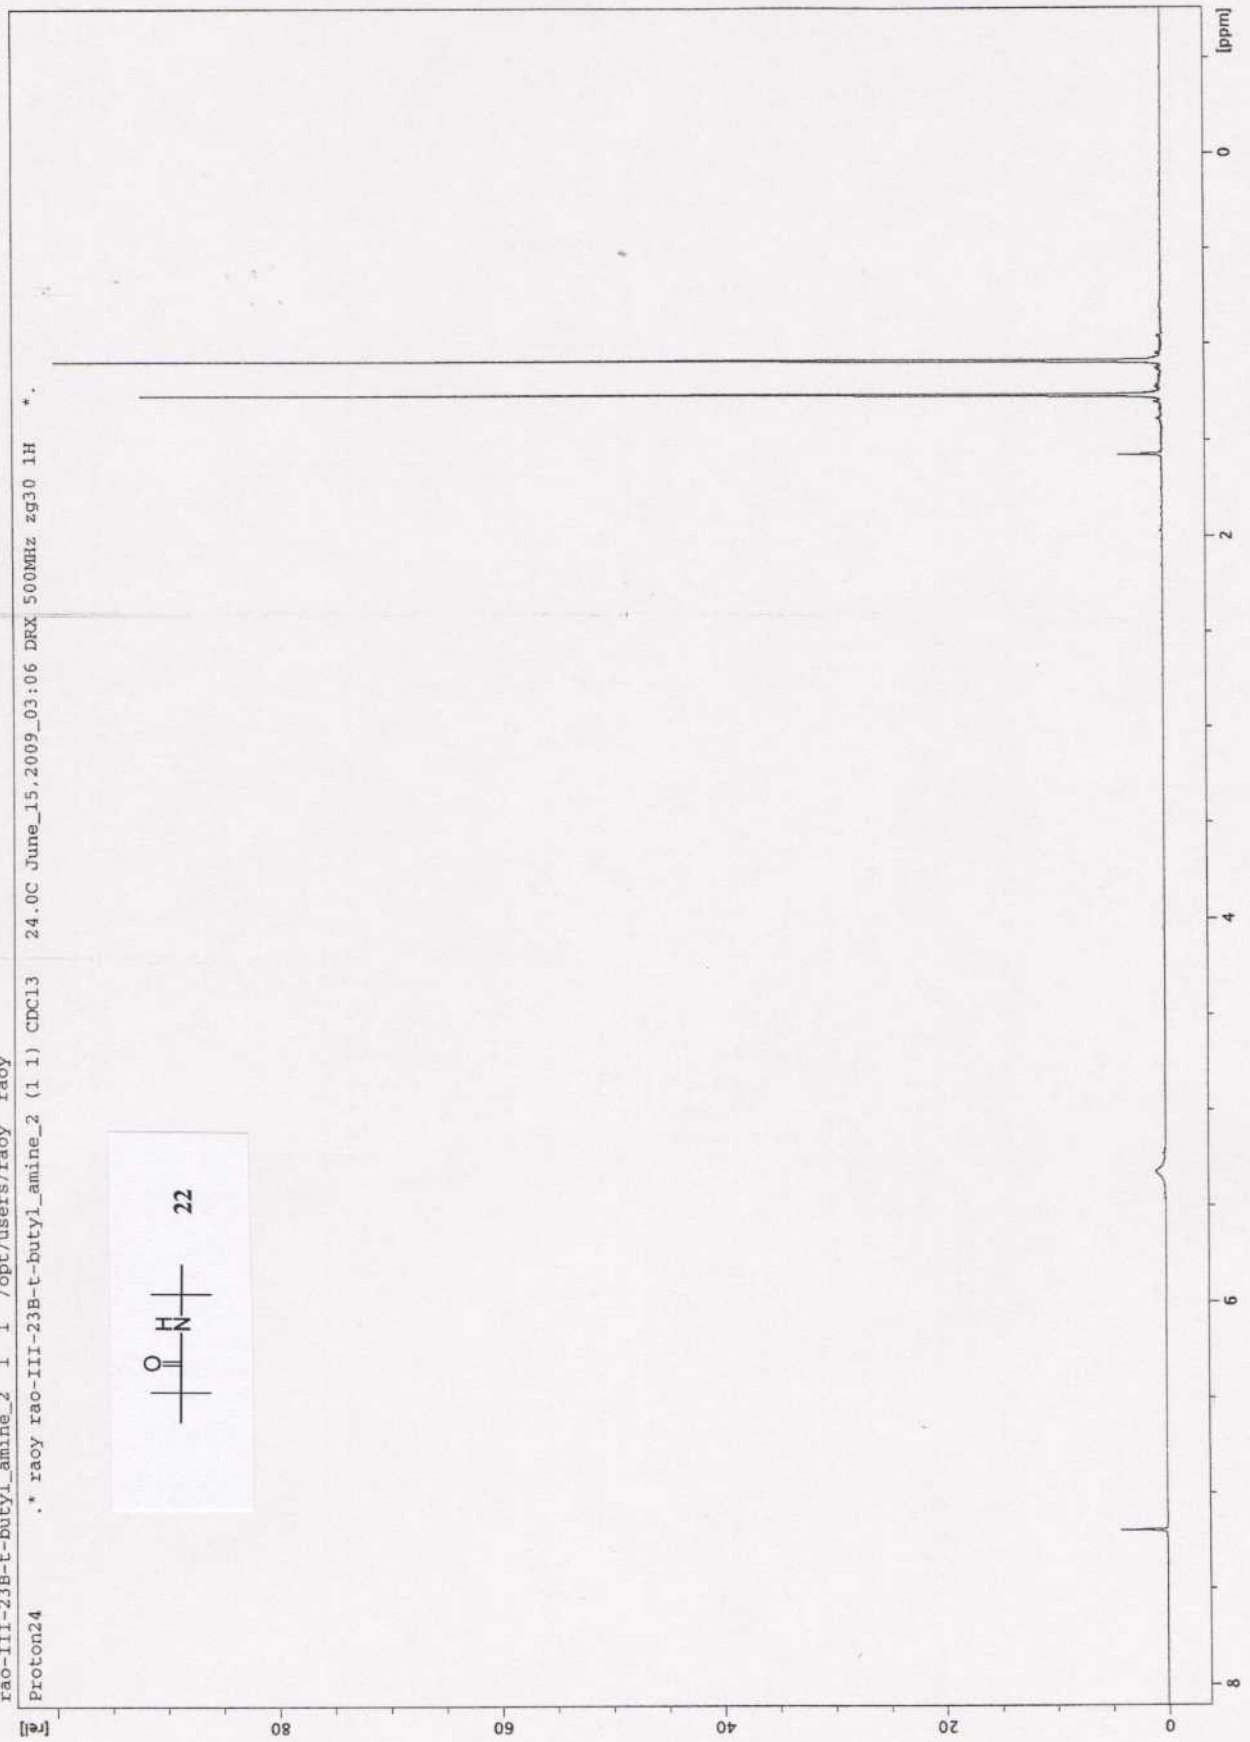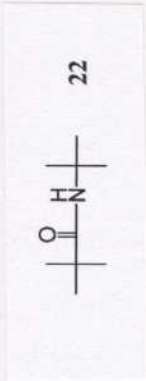

rao-III-23B-t-butyl\_amine-2-cl3 1 1 /opt/users/raoy raoy  
rao1 . \* raoy rao-III-23B-t-butyl\_amine-2-cl3 (1 1) MeOD 24.0C June\_15\_2009\_03:31 DRX 500MHz zgpg30 13C; 1H O2=4.000 \*

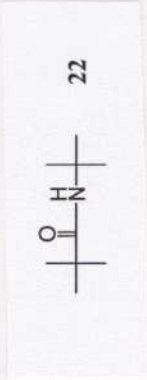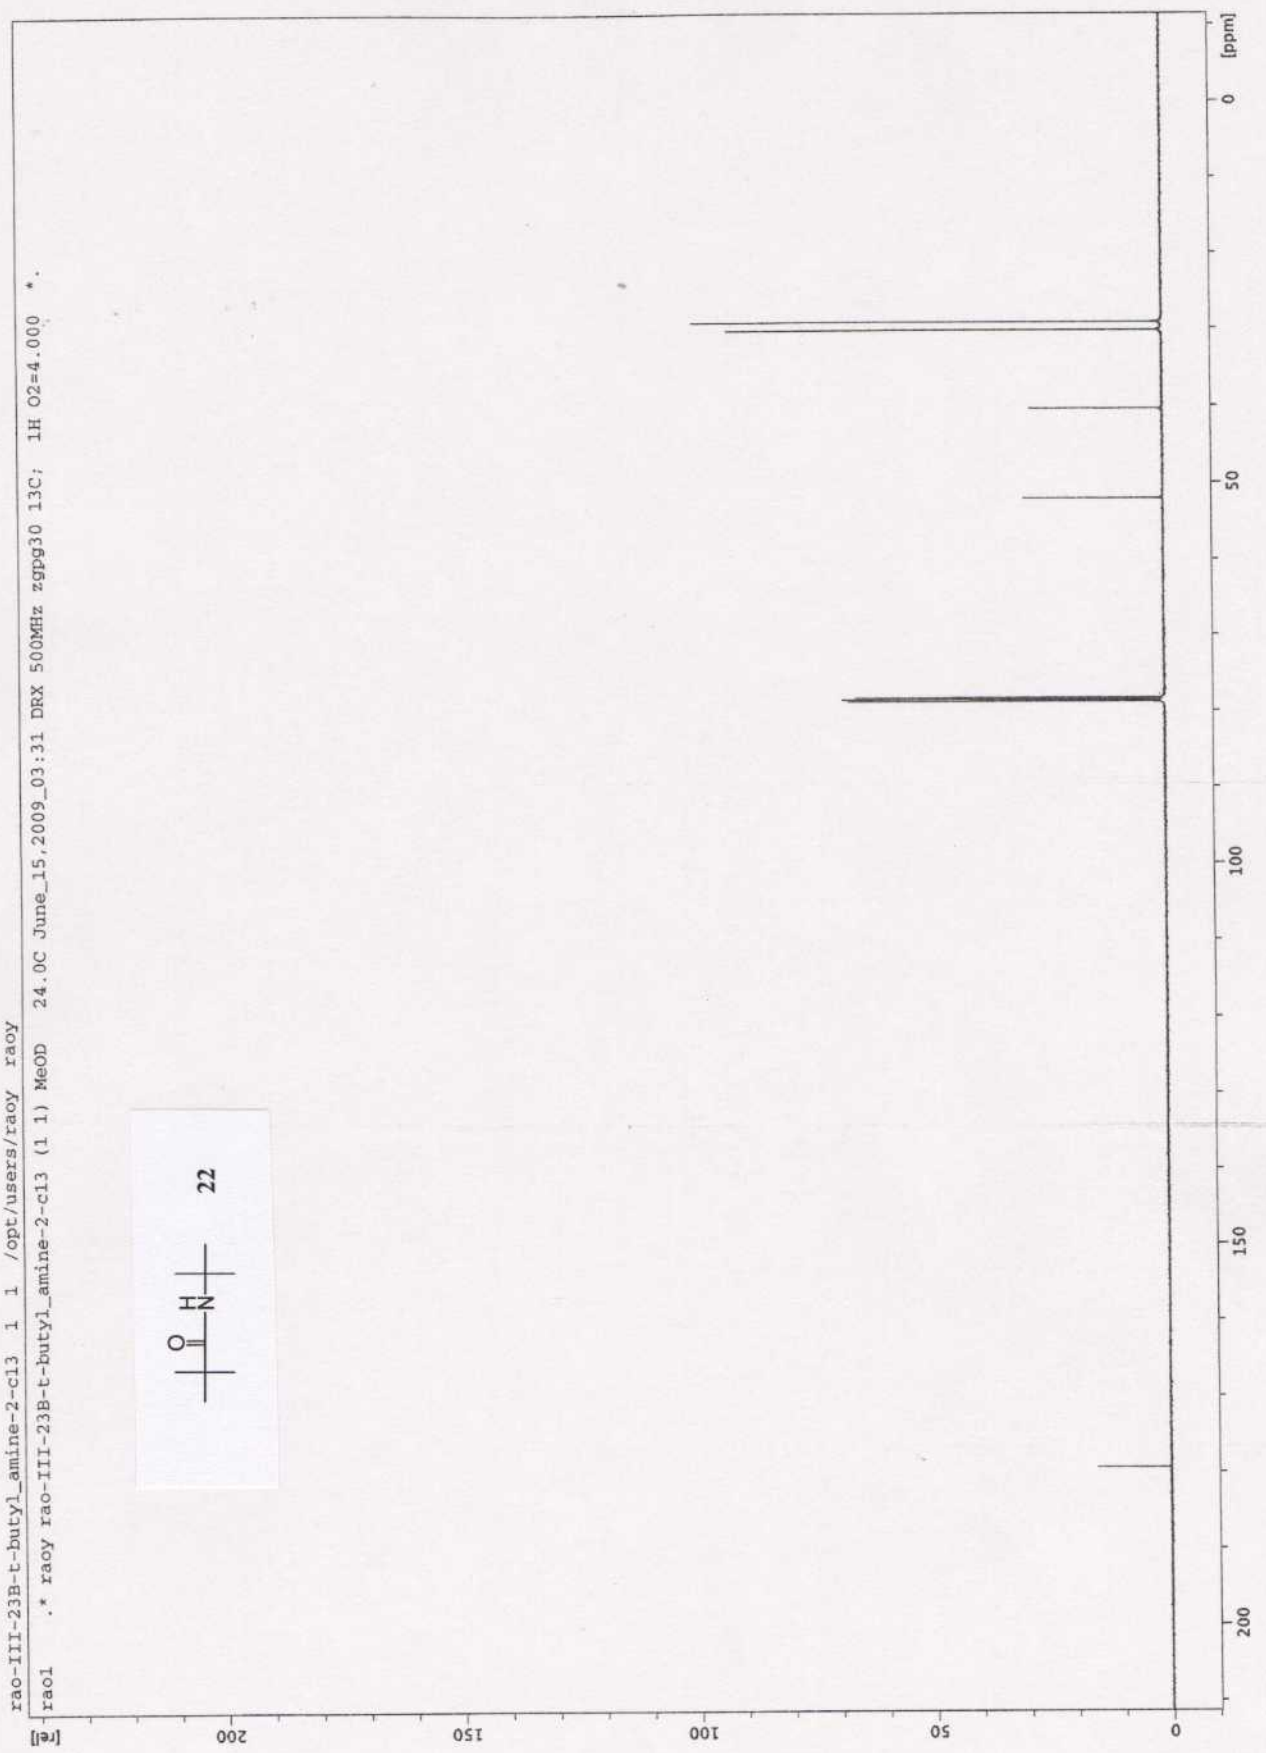



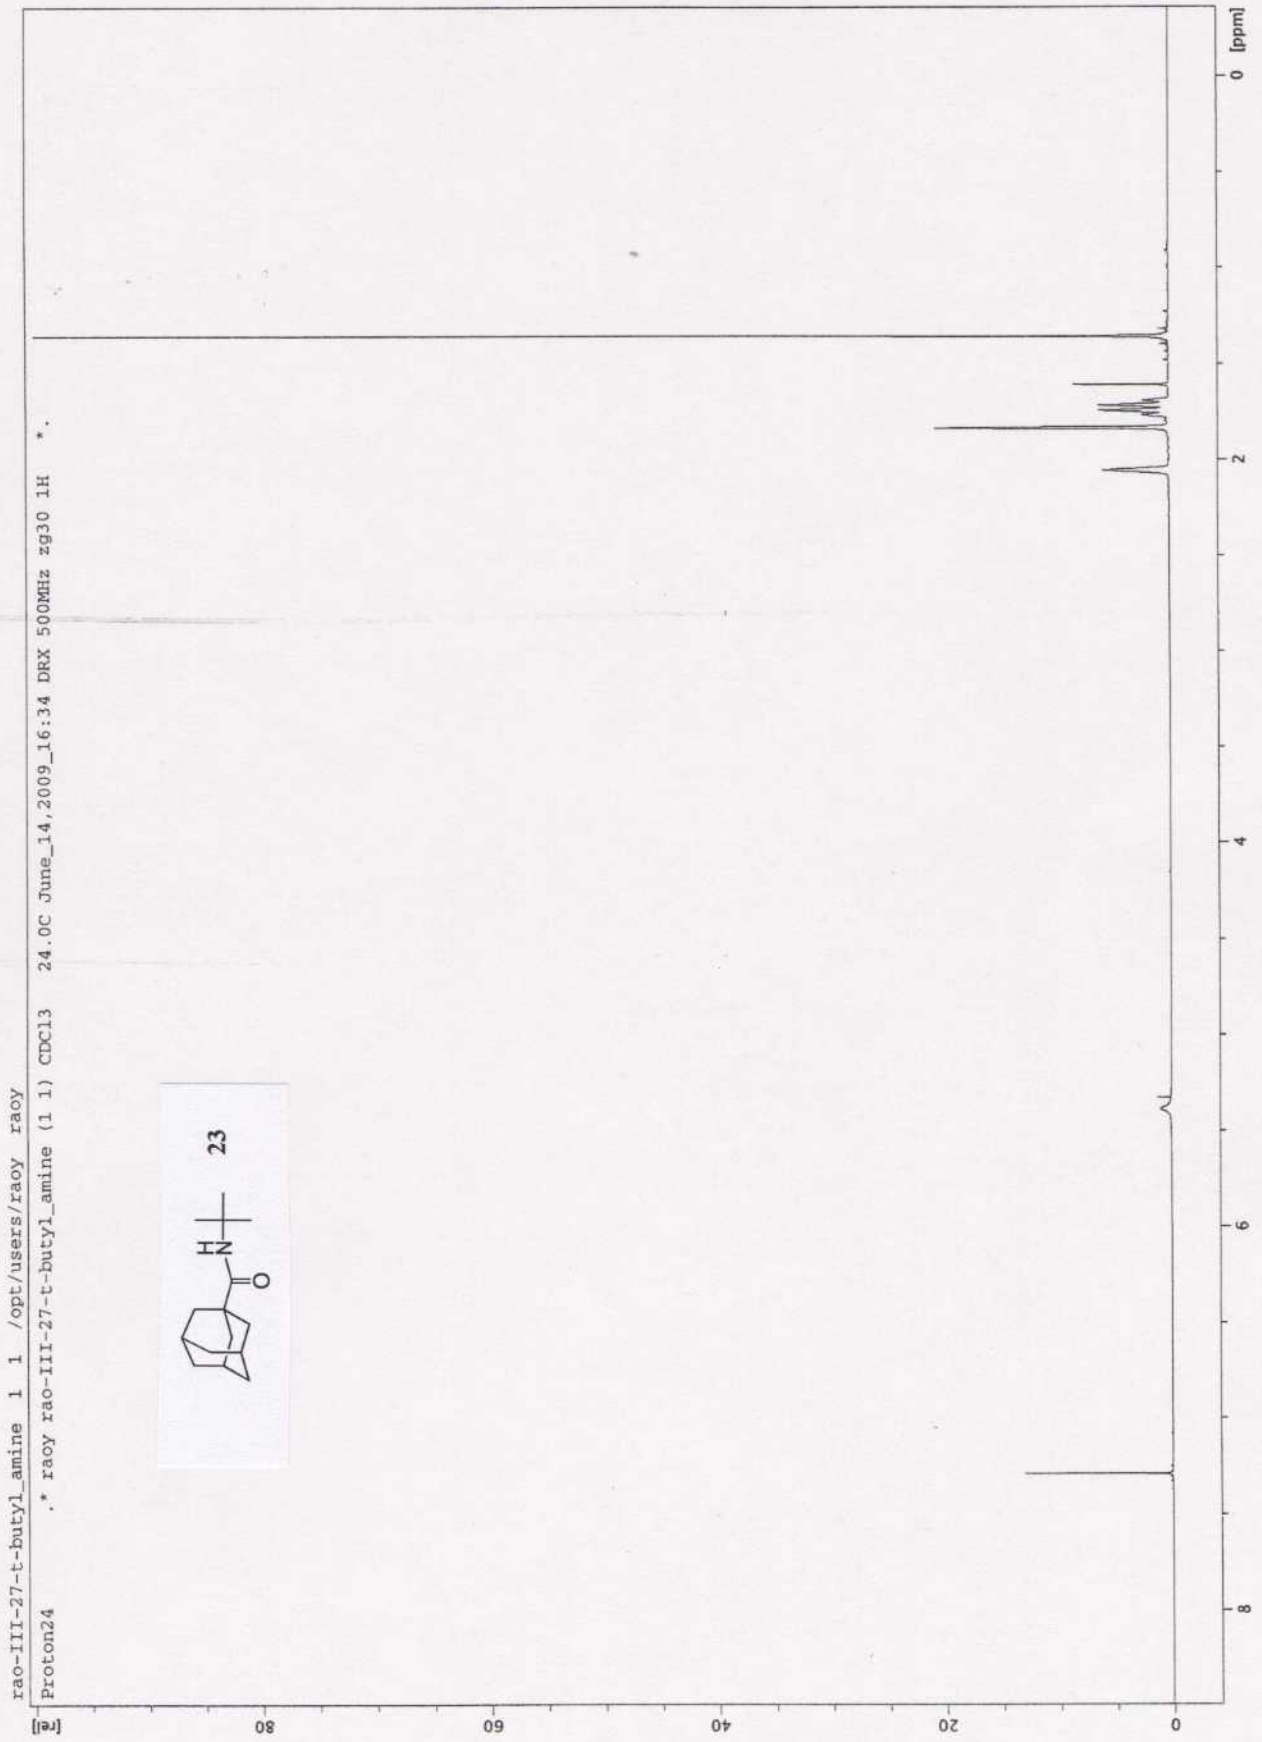

rao-III-27-t-butyl\_amine-cl3 1 1 /opt/users/raoy raoy  
raol . \* raoy rao-III-27-t-butyl\_amine-cl3 (1 1) MeOD 24.0C June 14, 2009\_17:20 DRX 500MHz zgpg30 13C; 1H O2=4.000 \*

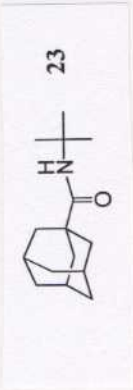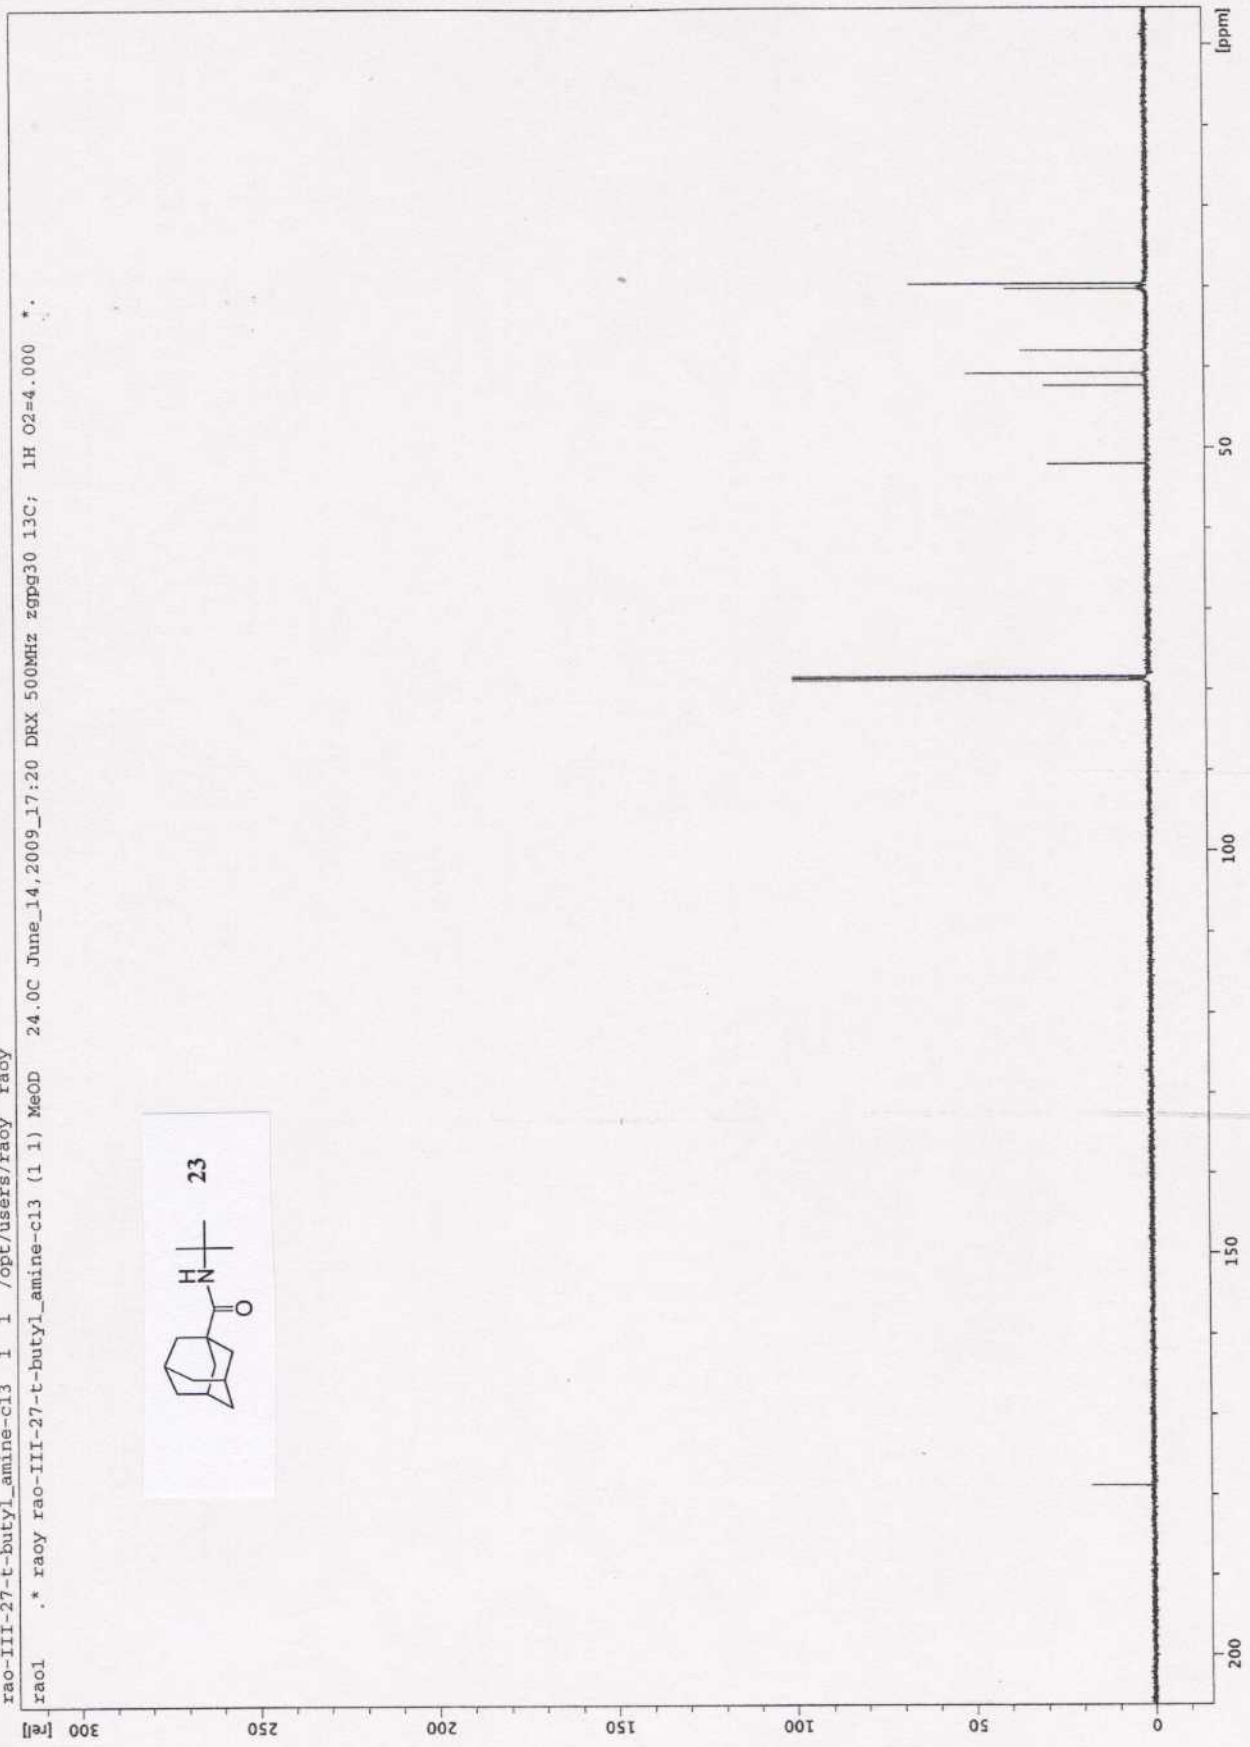



rao-III-20-Aniline 10 1 /opt/users/raoy raoy

\* raoy rao-III-20-Aniline (10 1) CDCl3 24.3C June\_11\_2009\_13:55:52 Bruker AVII+ 600MHz RRL1326: zgpg30 : 13C 110.000 ppm; 1H 4.500 ppm \*

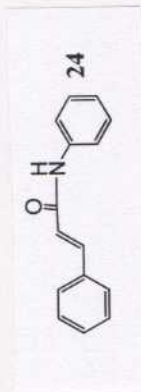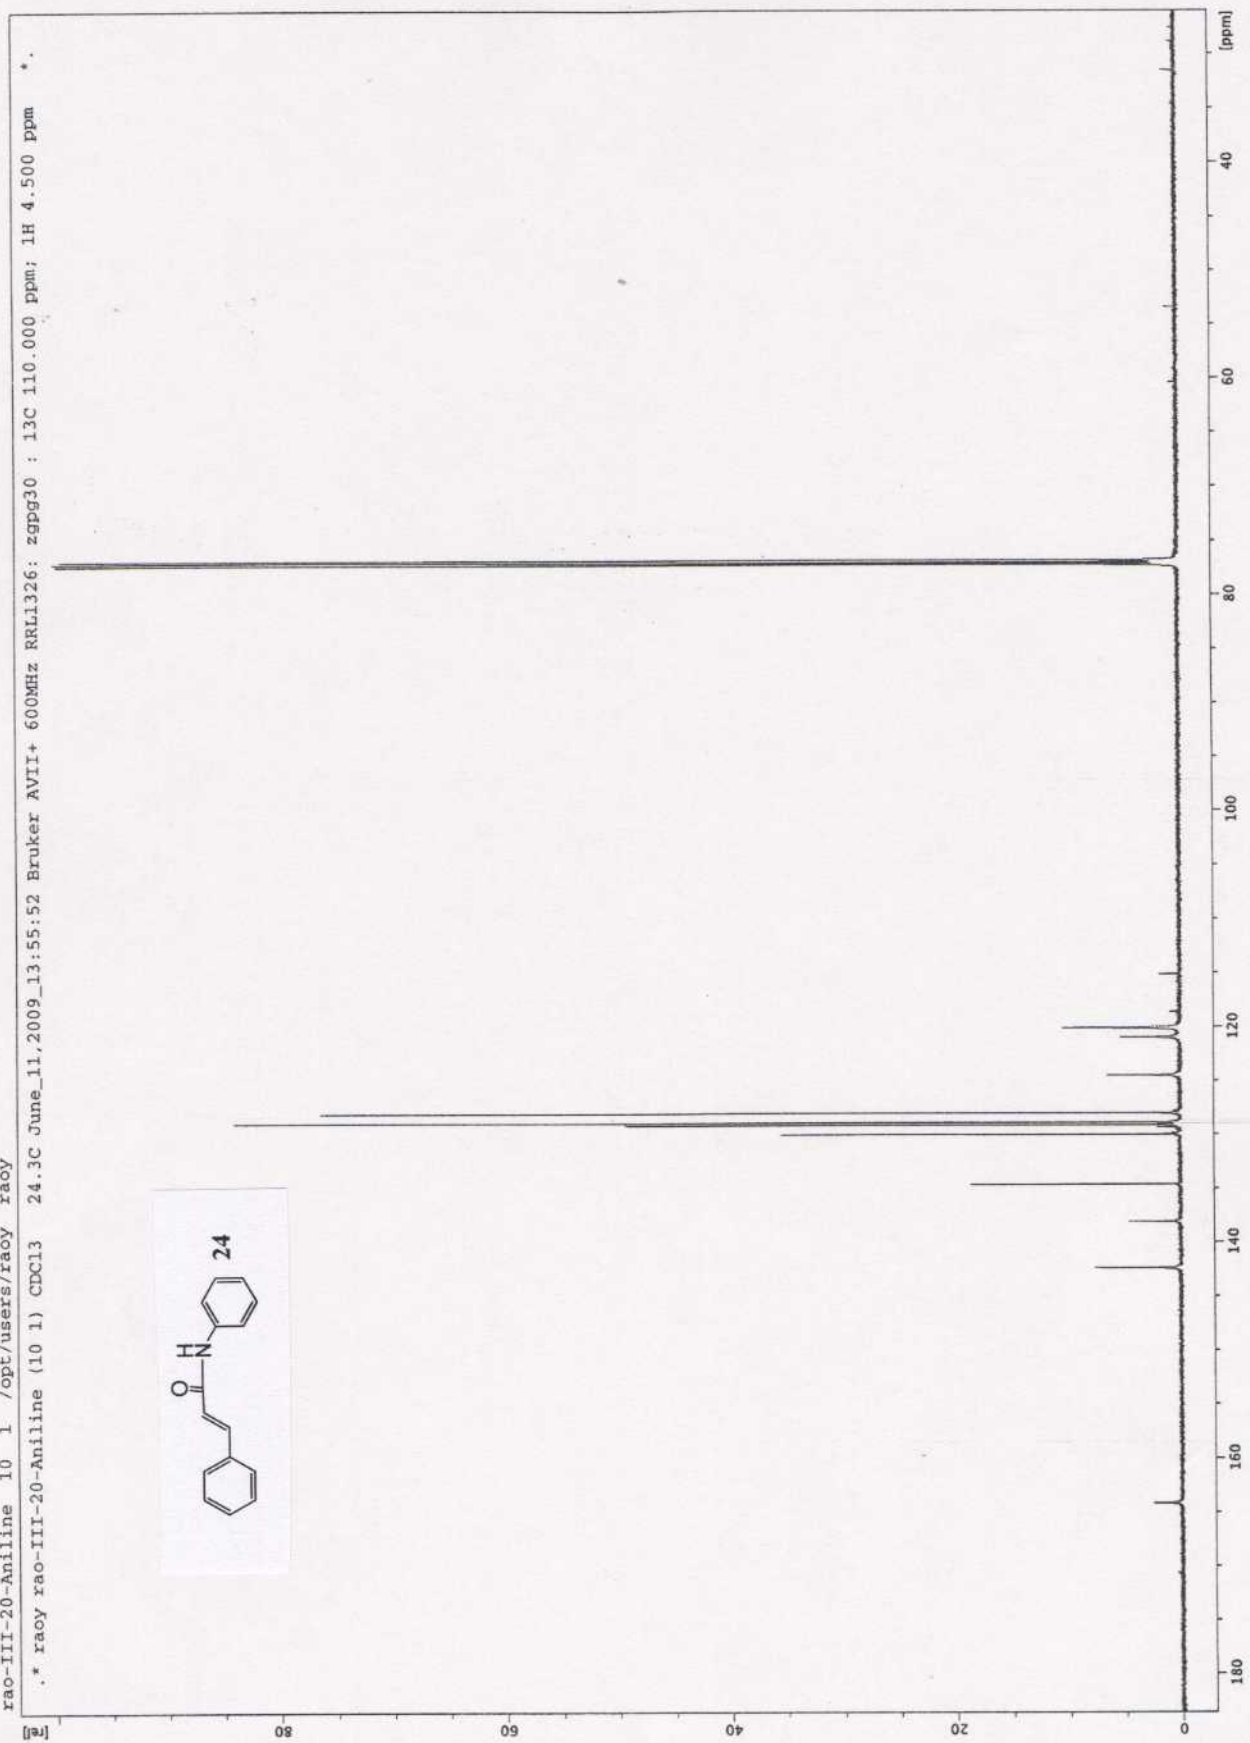



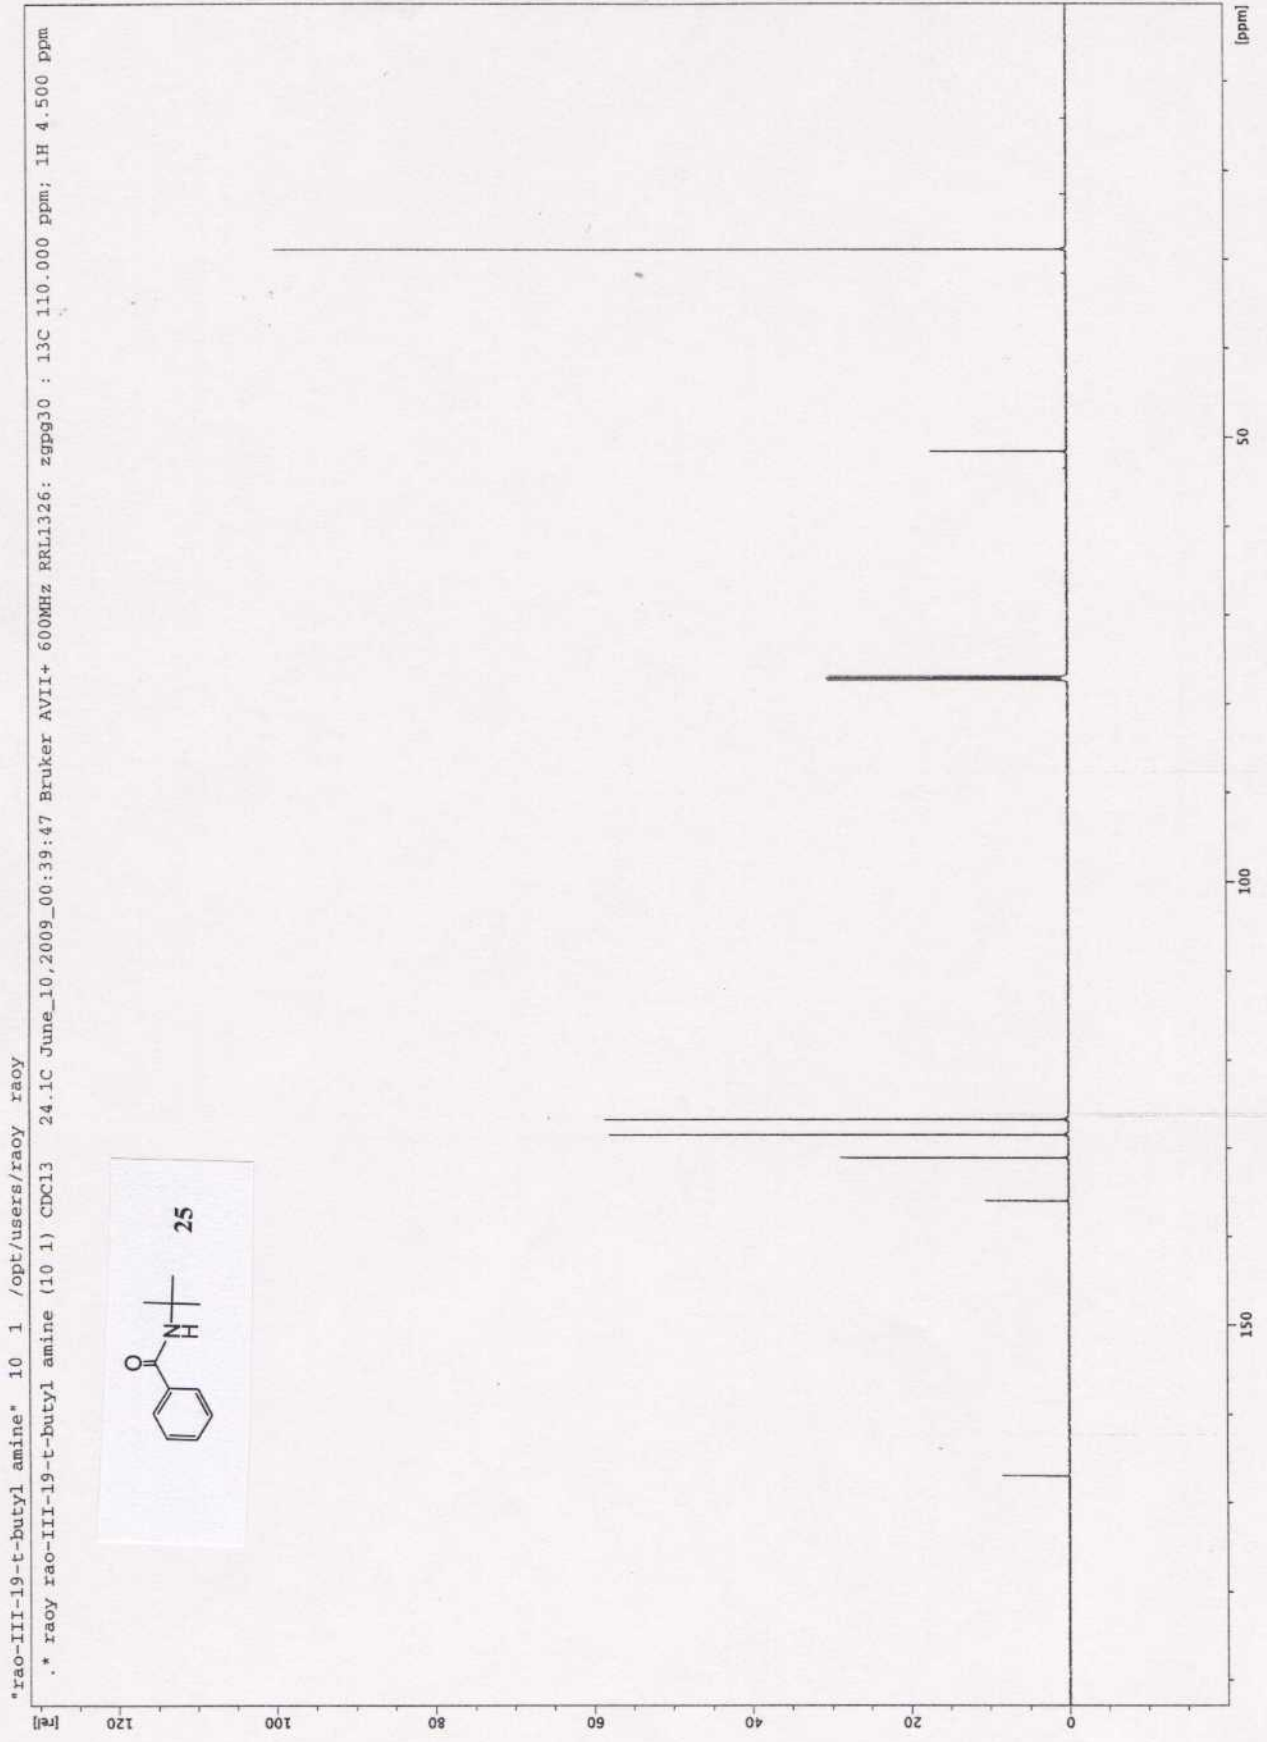

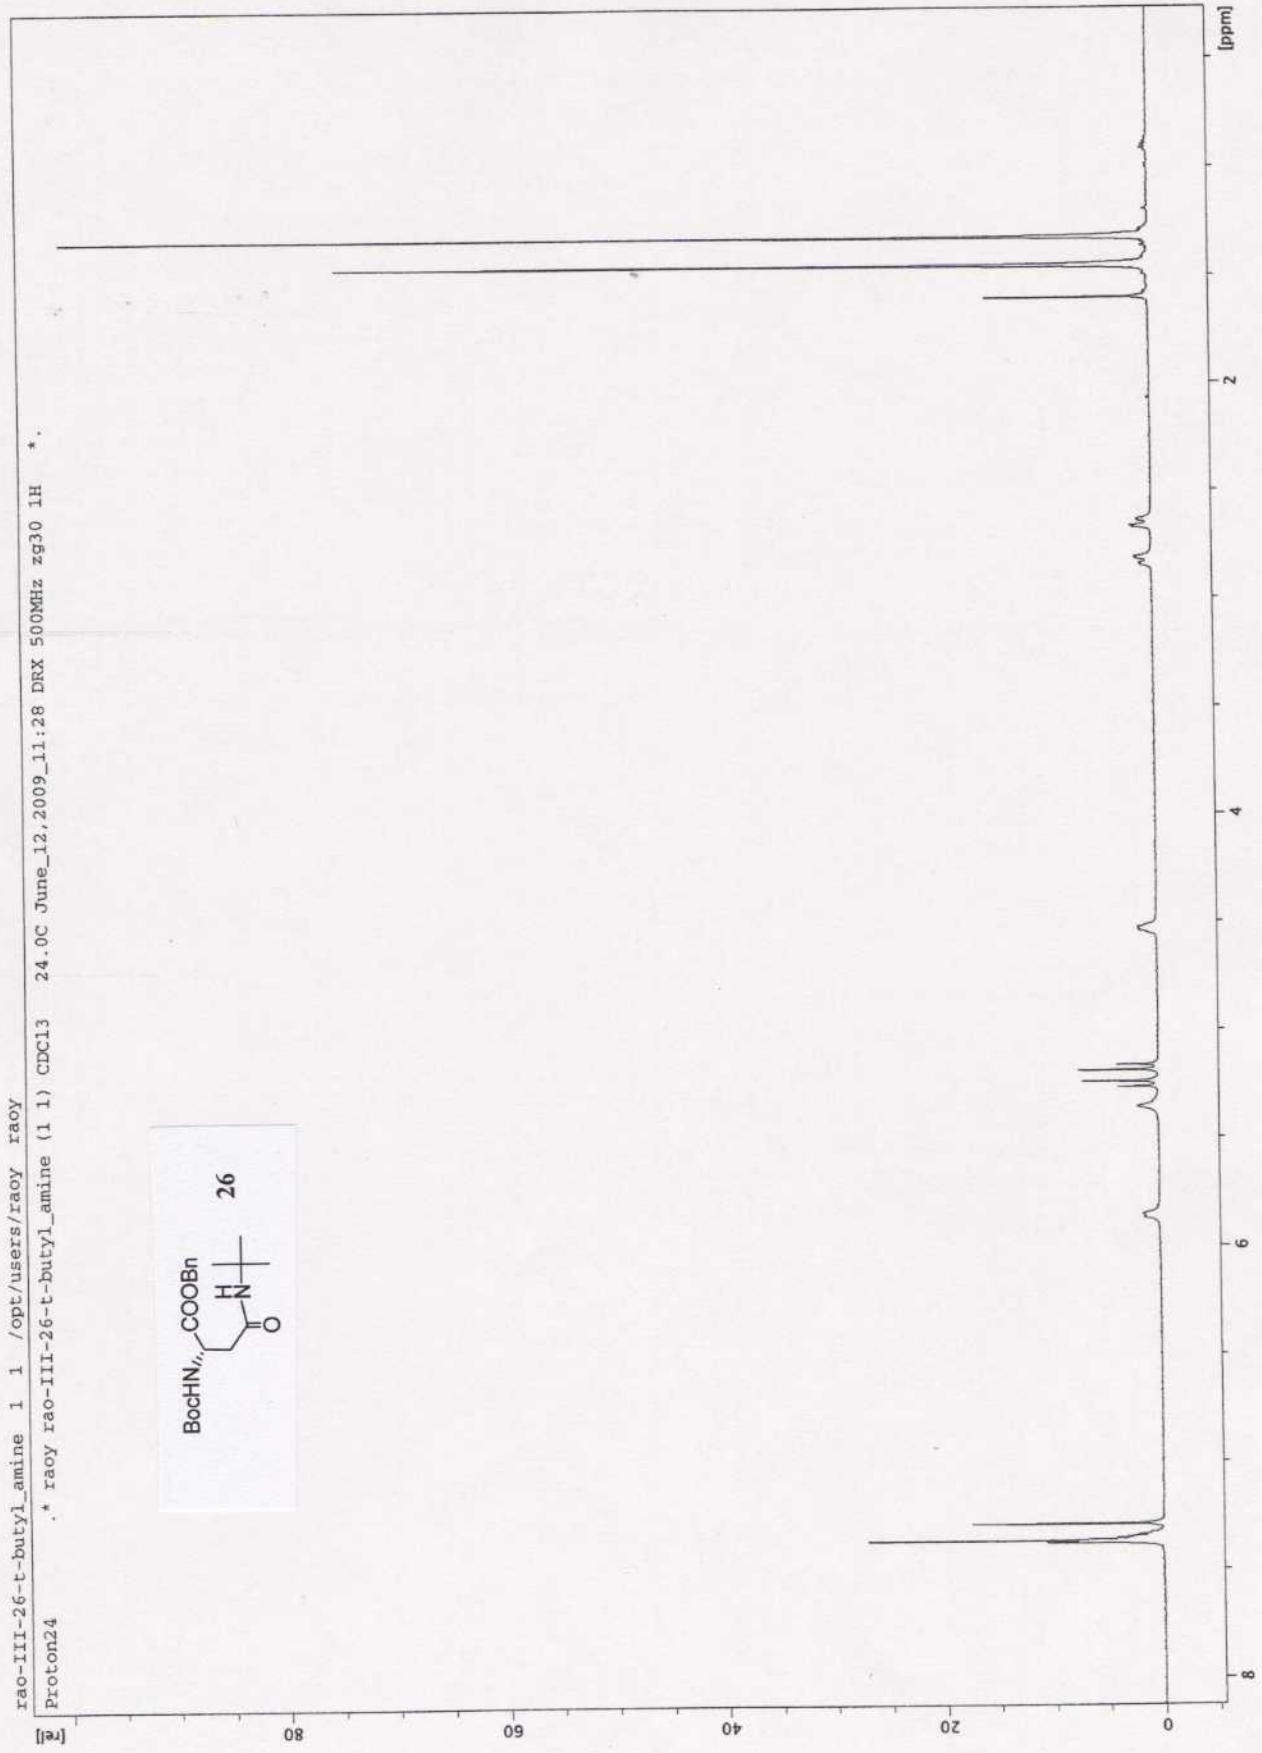

\*rao-III-26-t-butyl amine\* 10 1 /opt/users/raoy raoy  
\* raoy rao-III-26-t-butyl amine (10 1) CDCl3 24.1C June\_12,2009\_12:41:18 Bruker AVII+ 600MHz RRL1326: zgpg30 : 13C 110.000 ppm; 1H 4.500 ppm

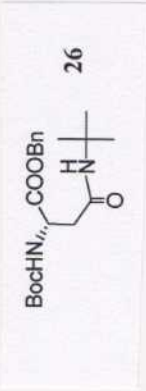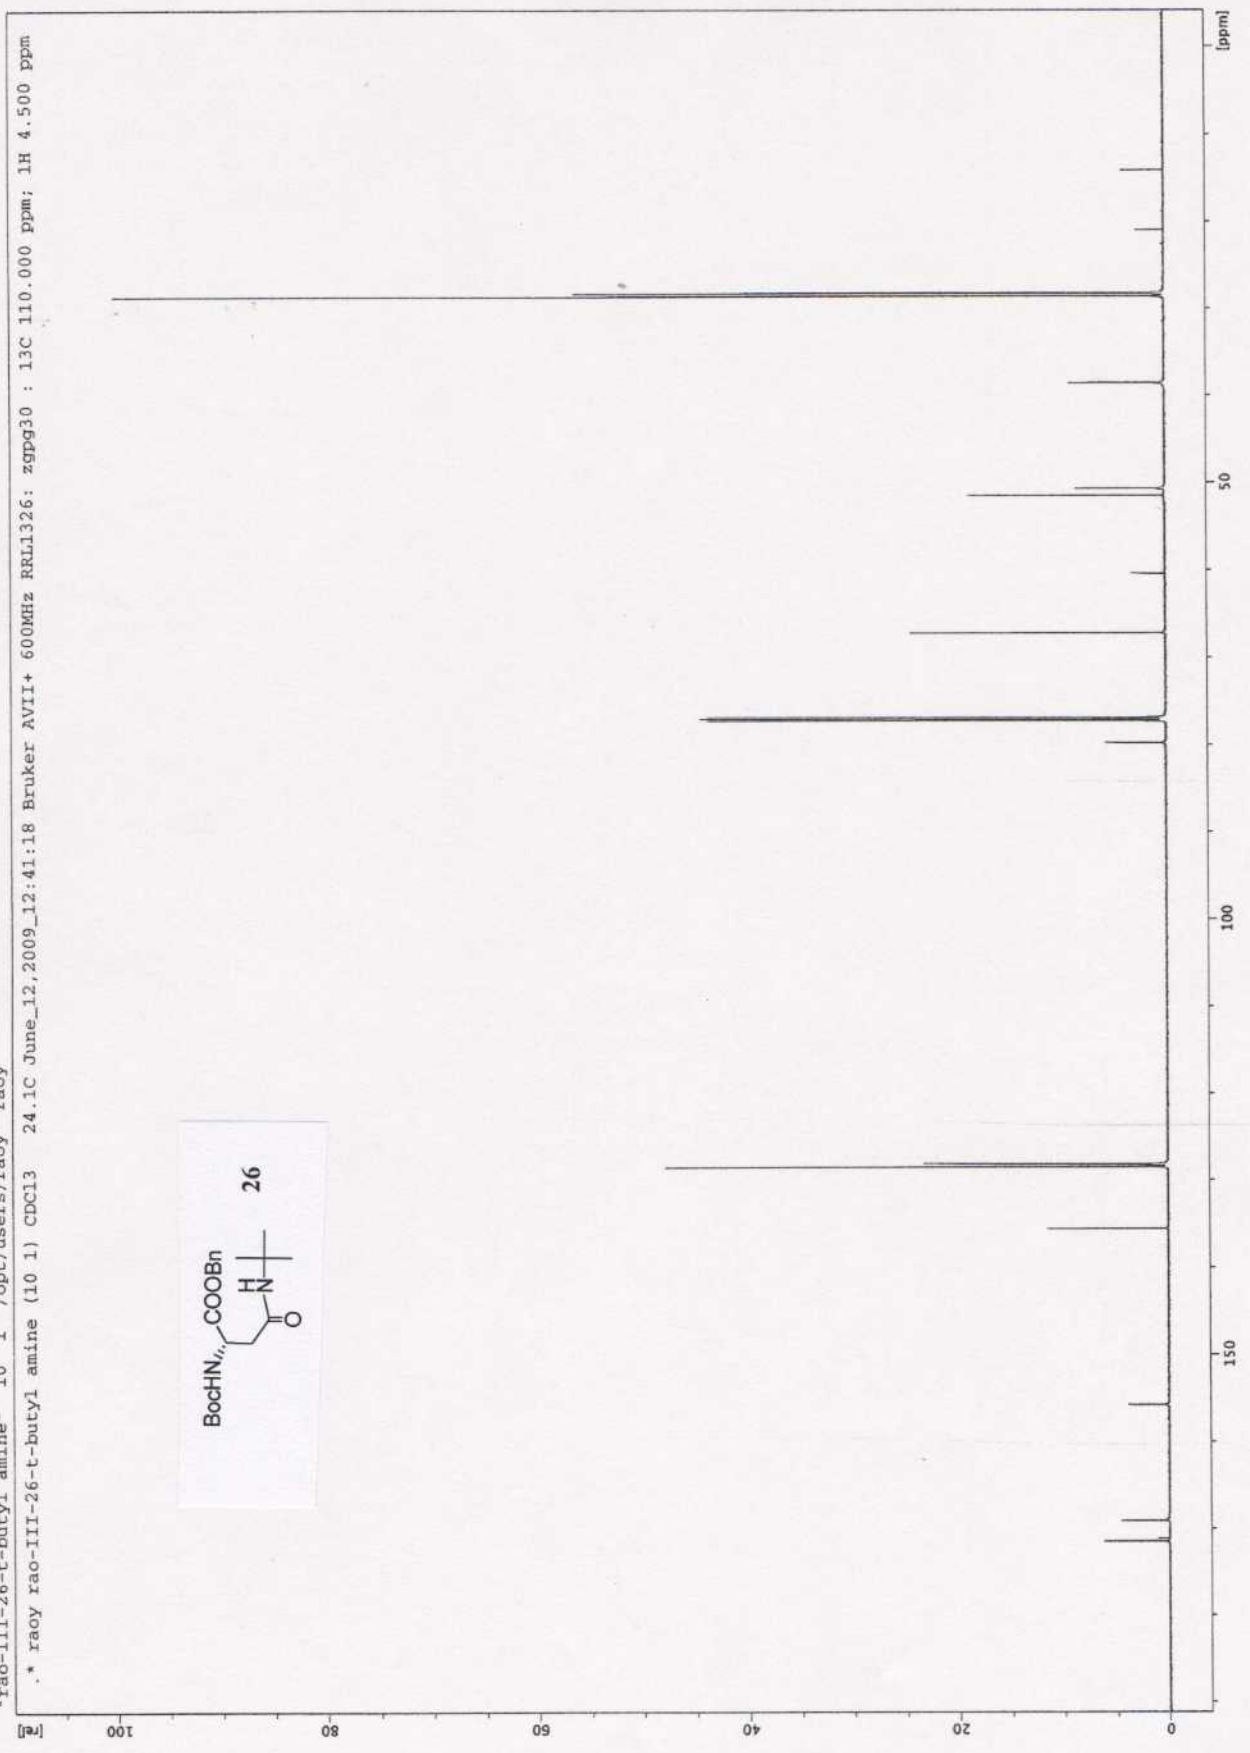



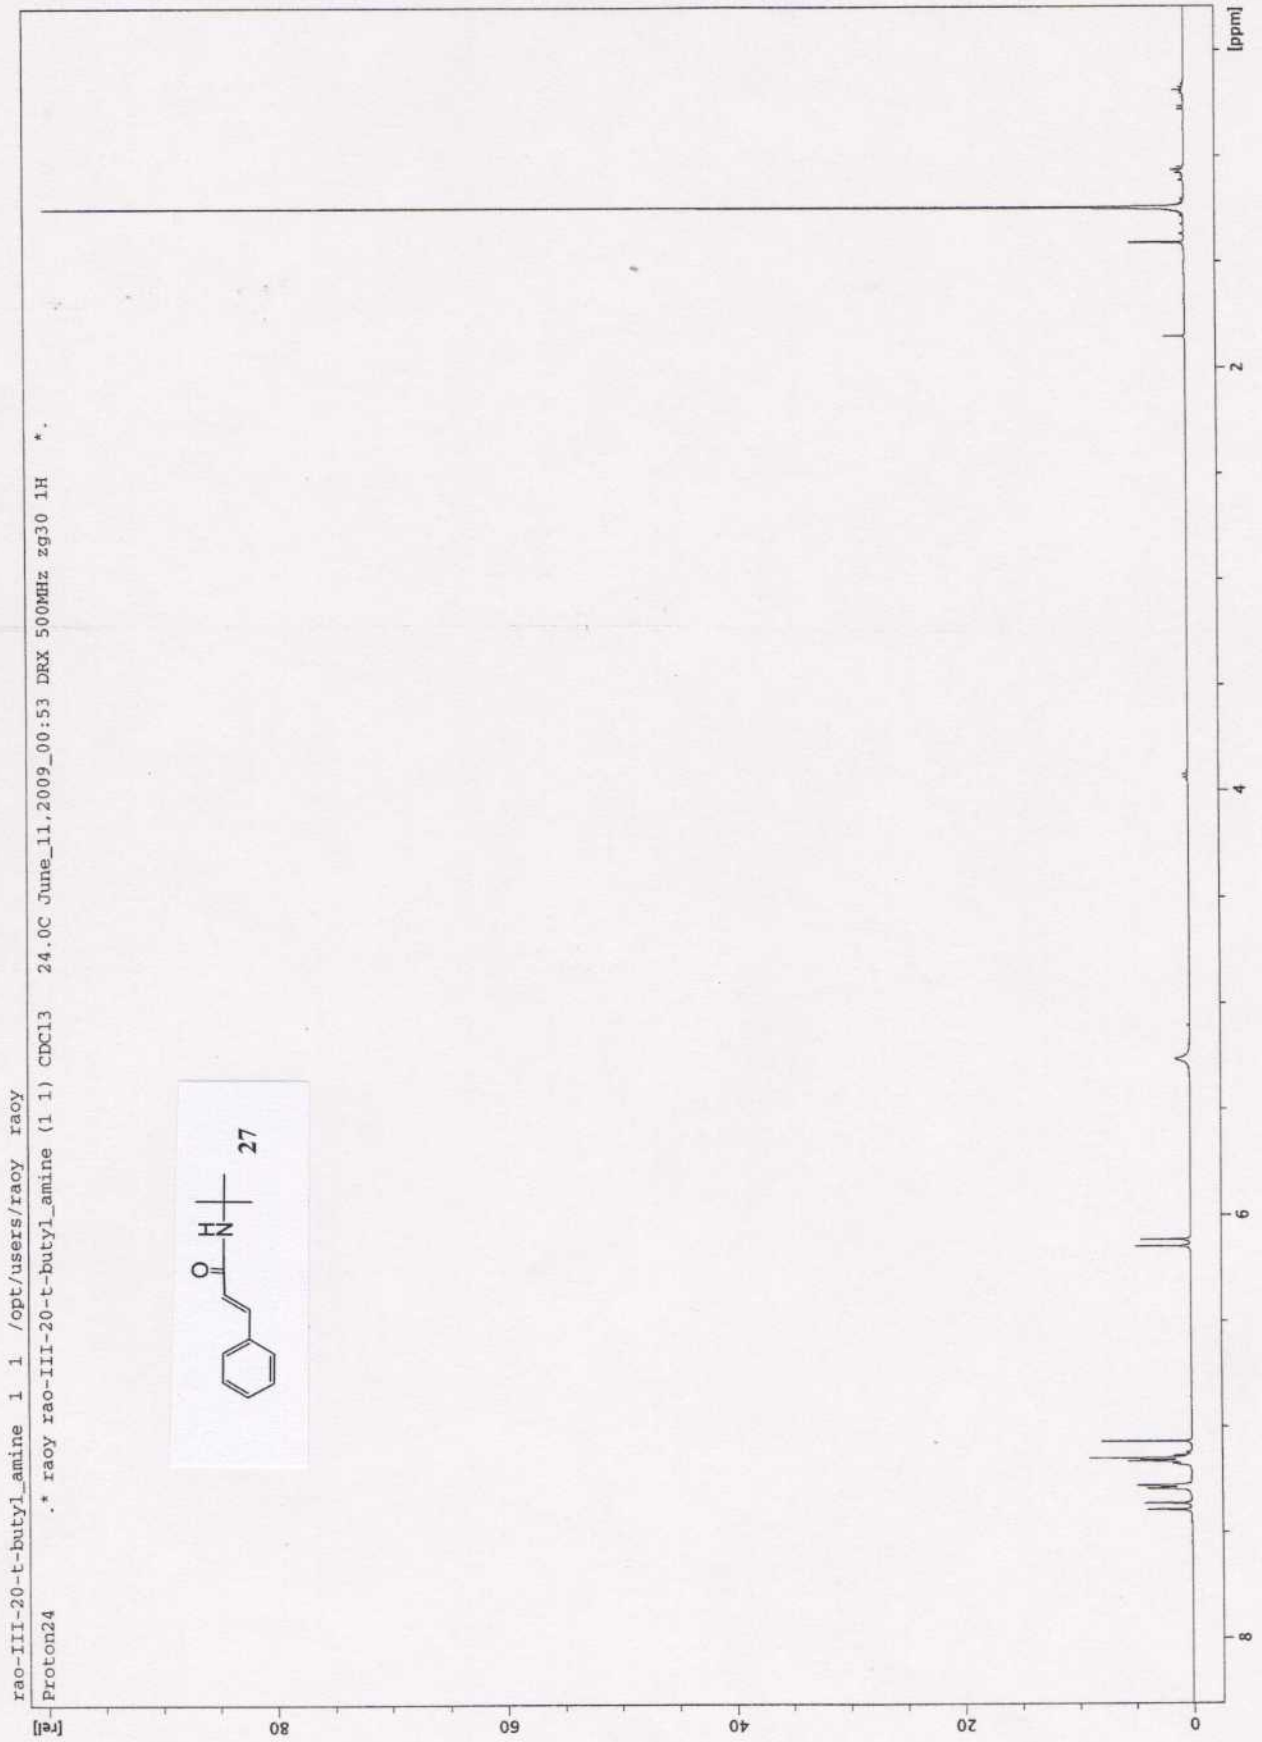

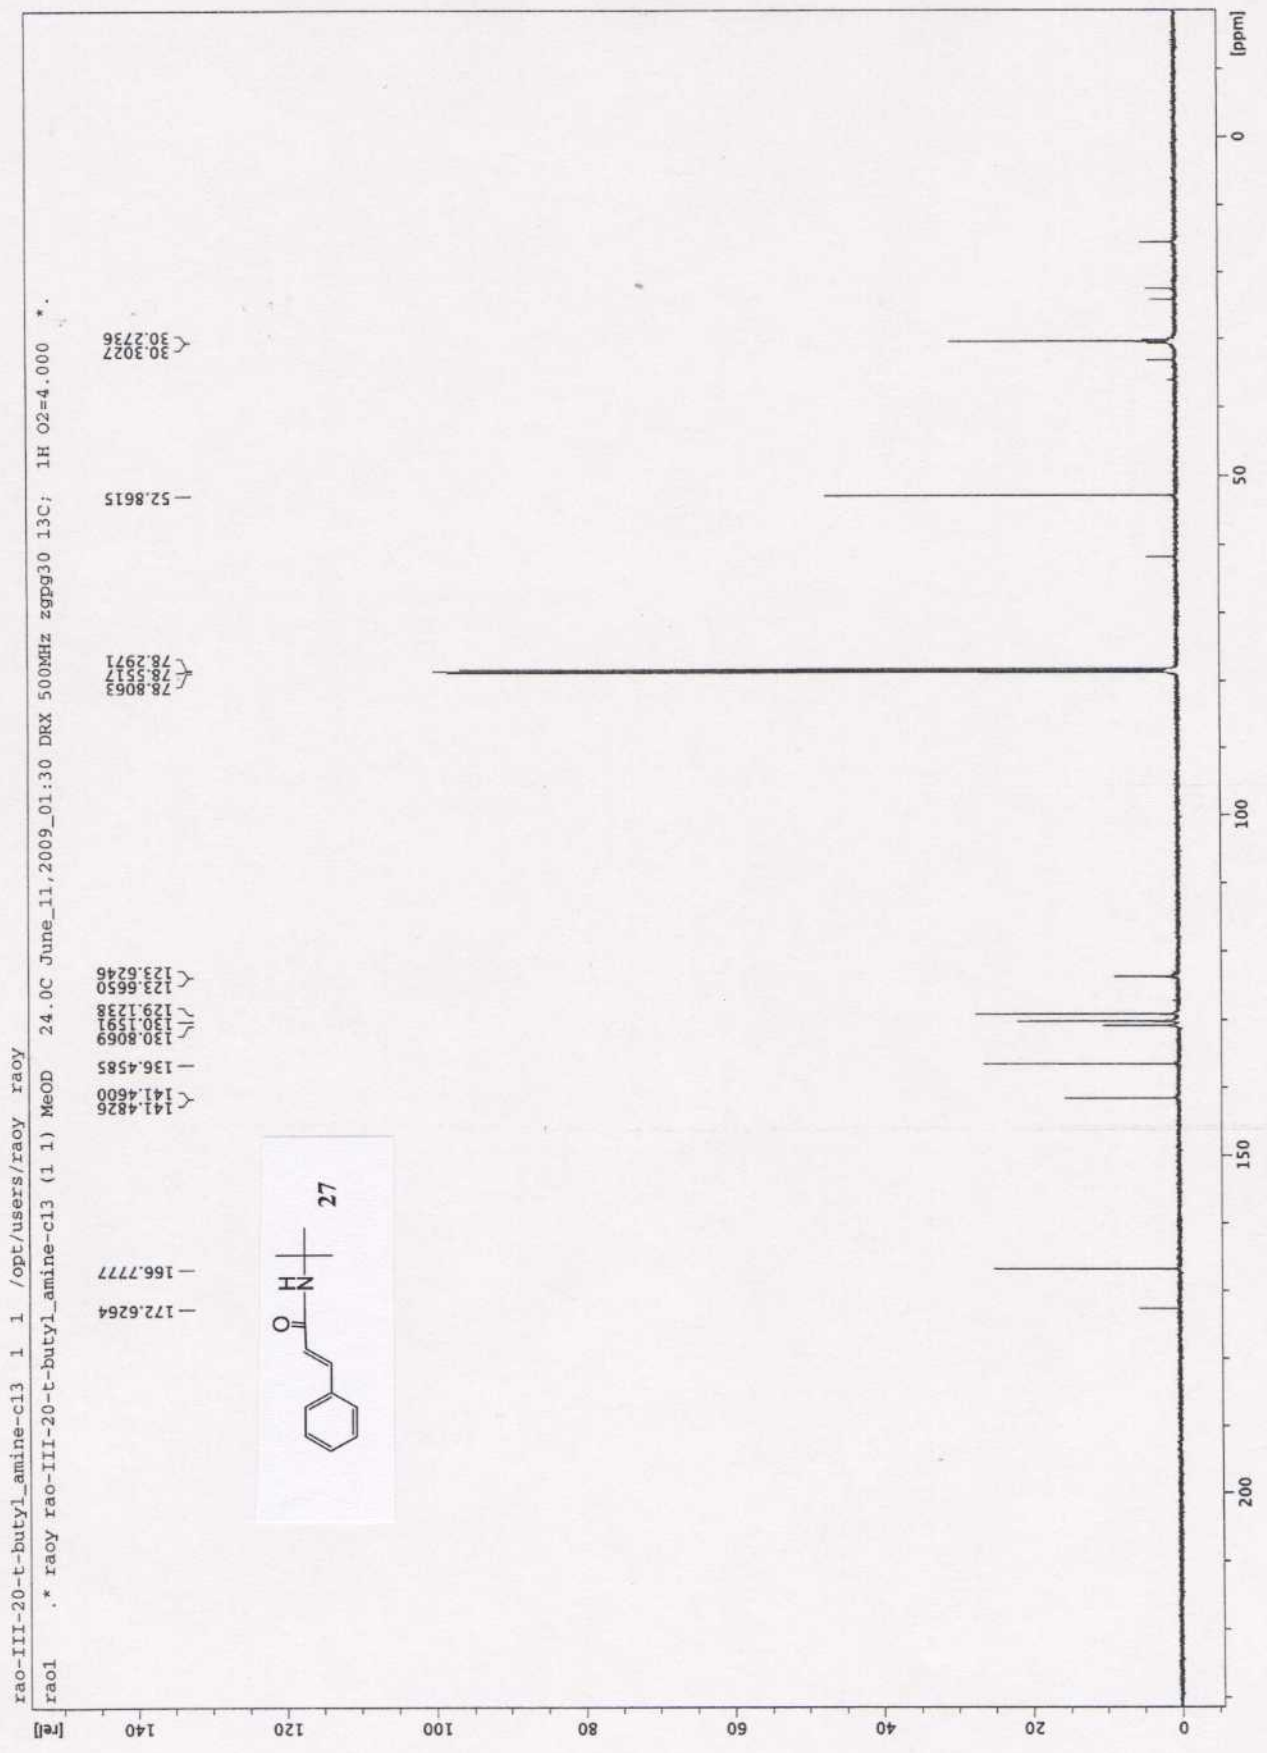

rao-III-23B-Pyrrolidine 1 1 /opt/users/raoy raoy  
Proton24 \* raoy rao-III-23B-Pyrrolidine (1 1) CDCl3 24.0C June\_14,2009\_18:15 DRX 500MHz zg30 1H \*

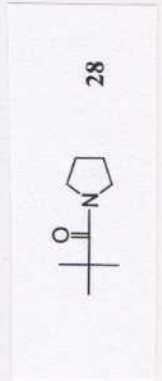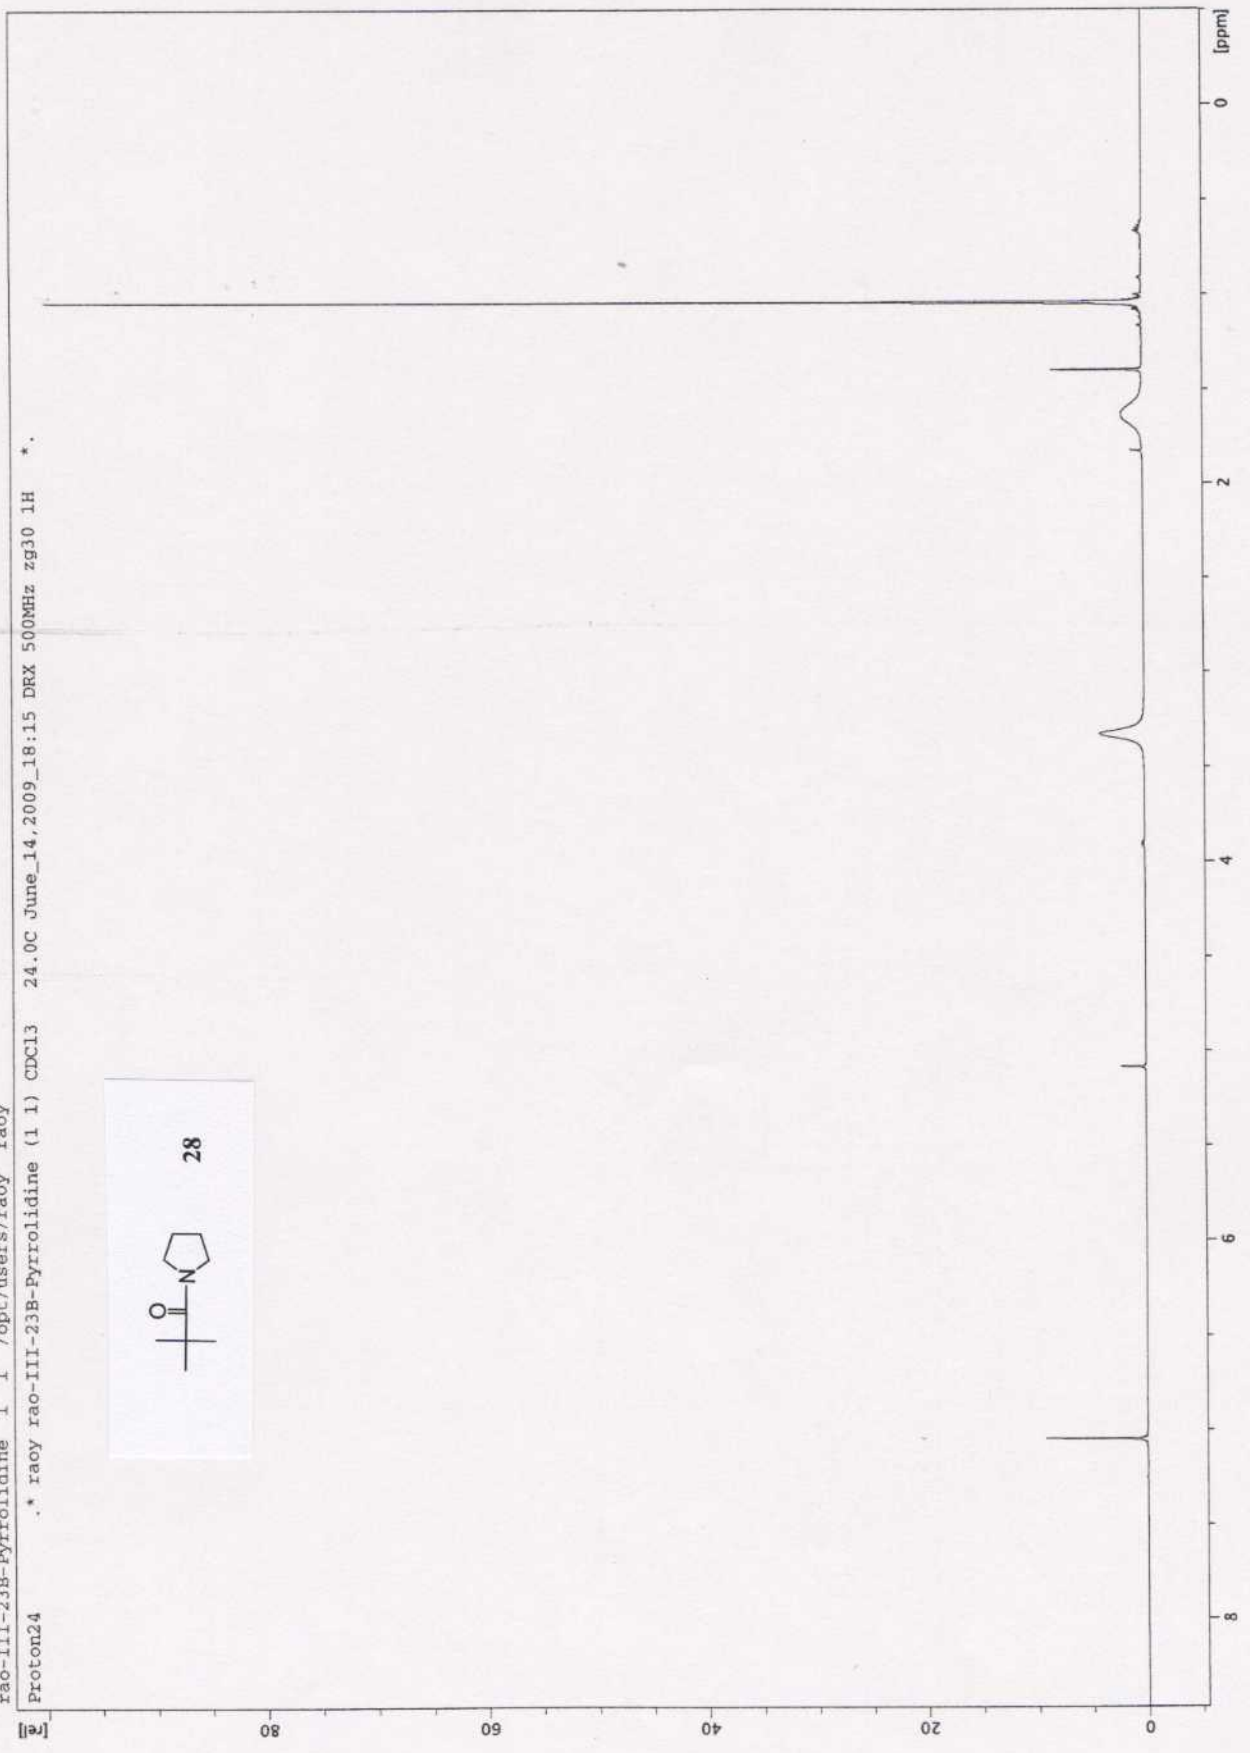

rao-III-23B-Pyrrolidine-cl3 1 1 /opt/users/raoy raoy  
rao1 . \* raoy rao-III-23B-Pyrrolidine-cl3 (1 1) CDCl3 24.0C June\_14,2009\_19:55 DRX 500MHz zgpg30 13C; 1H O2=4.000 \*

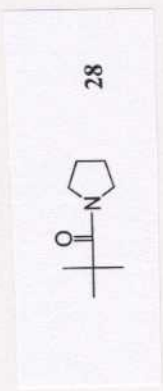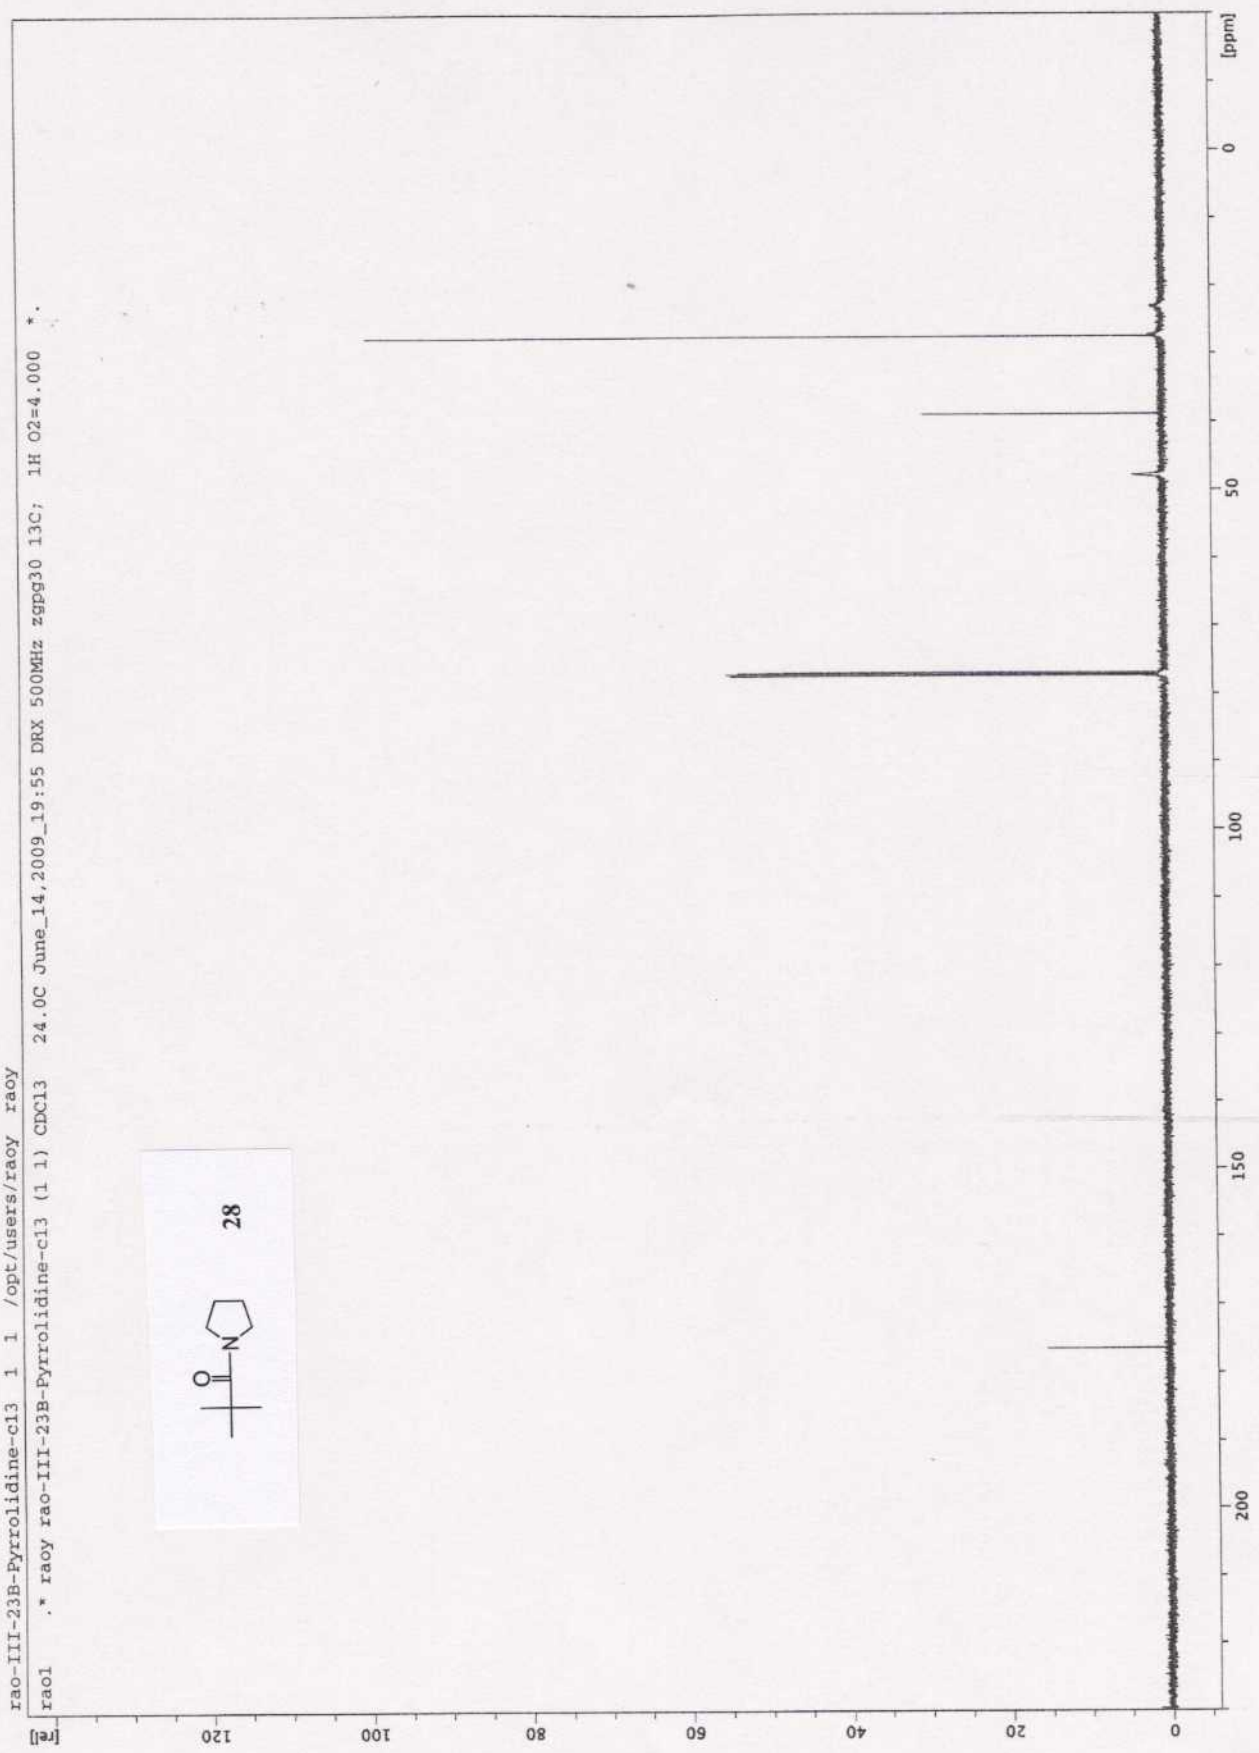

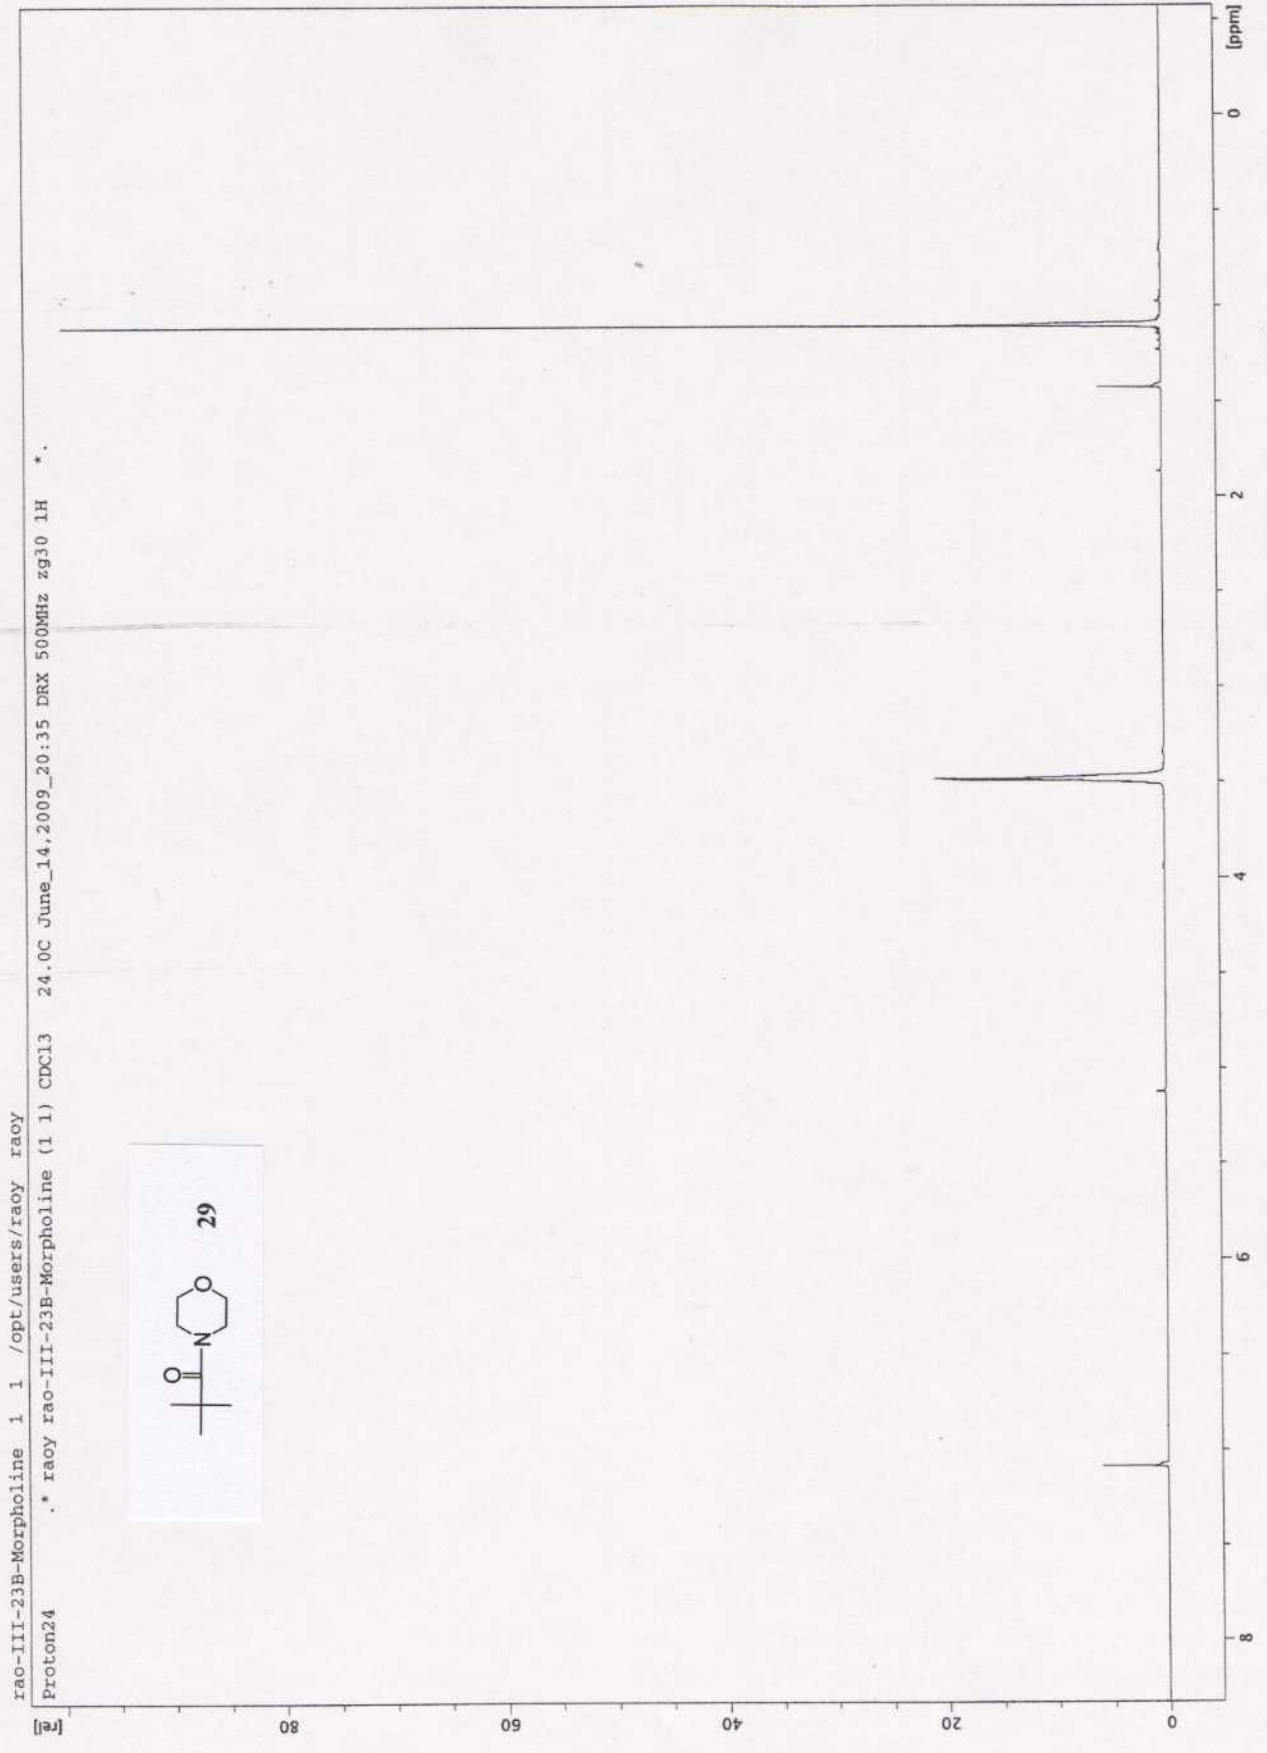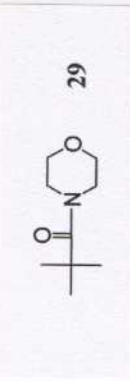

rao-III-23B-Morpholine-cl3 1 1 /opt/users/raoy raoy

raol . \* raoy rao-III-23B-Morpholine-cl3 (1 1) MeOD 24.0C June\_15,2009\_00:09 DRX 500MHz zgpg30 13C; 1H O2=4.000 \*

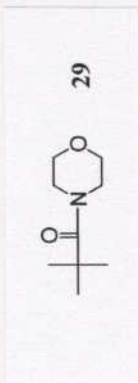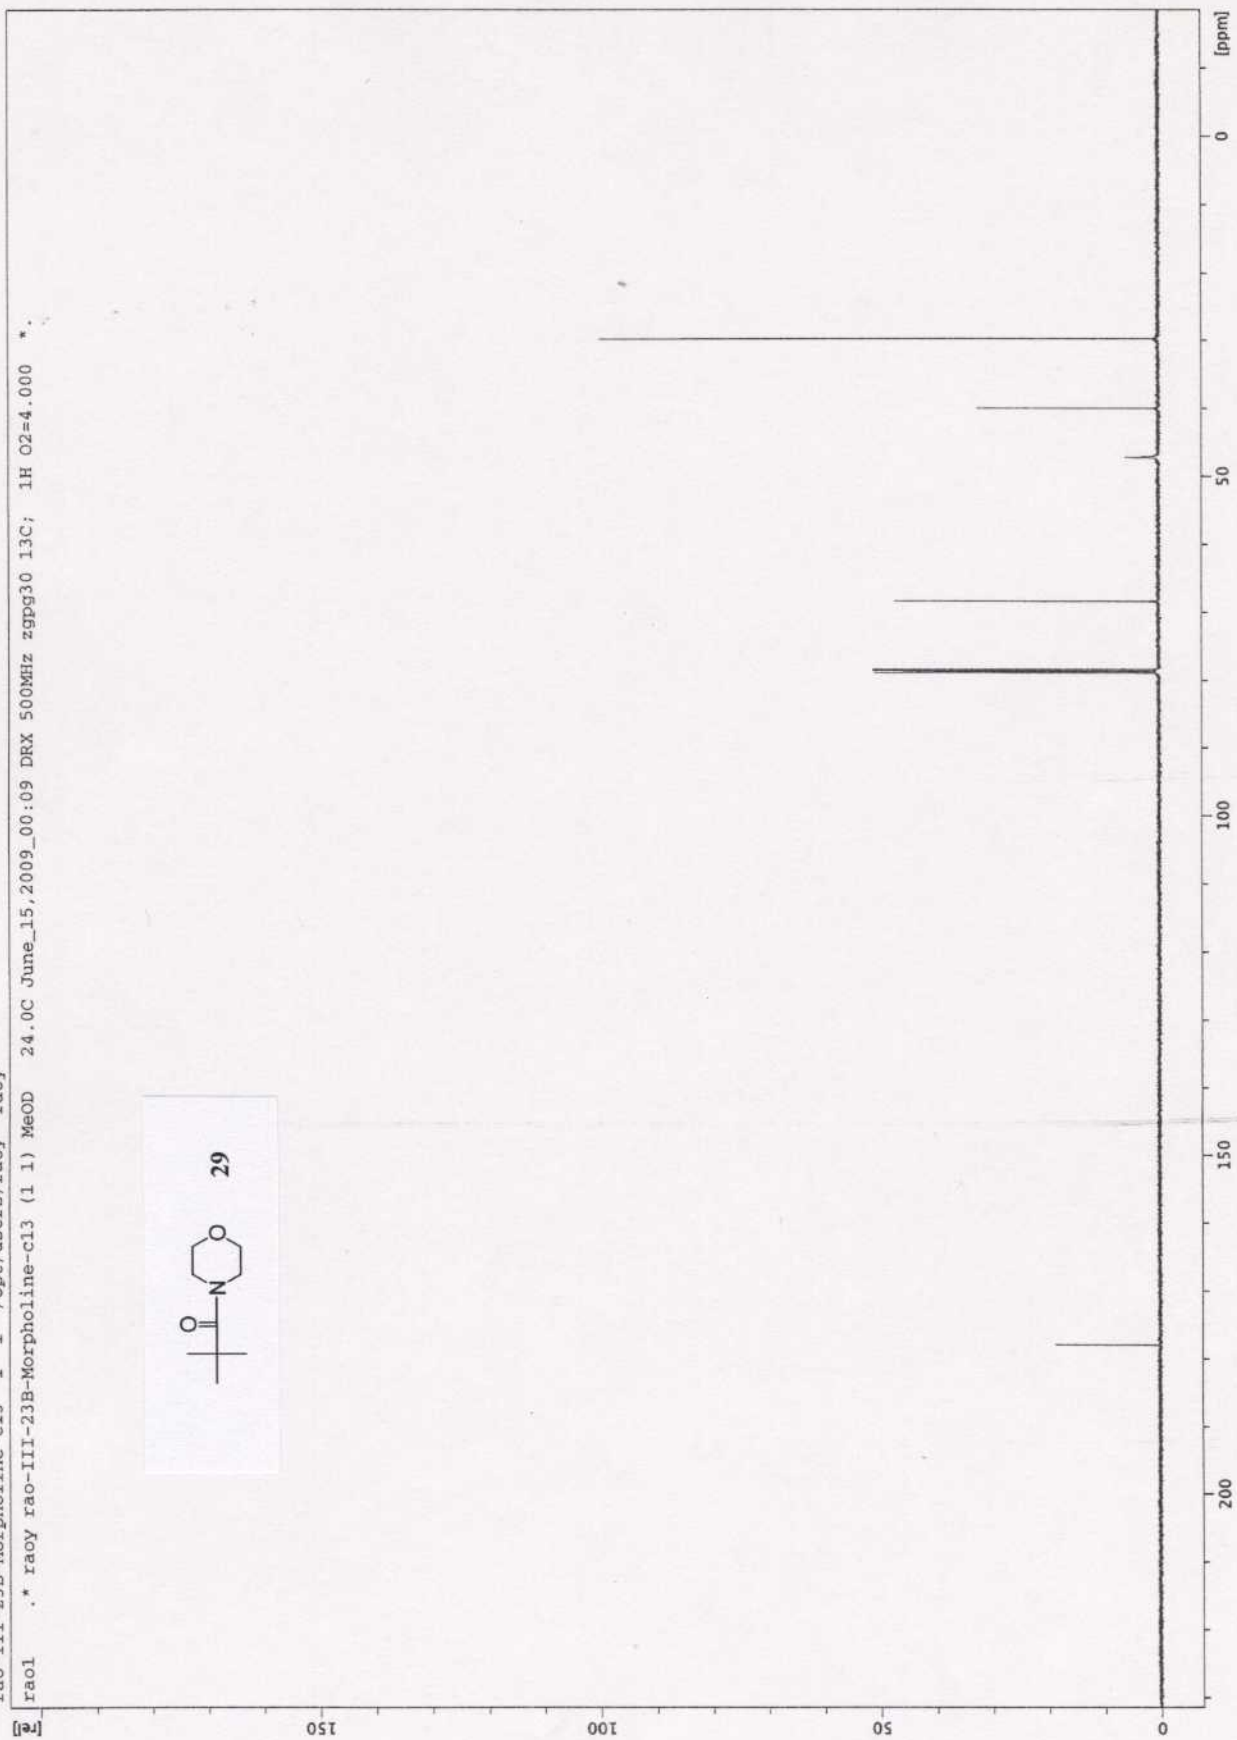

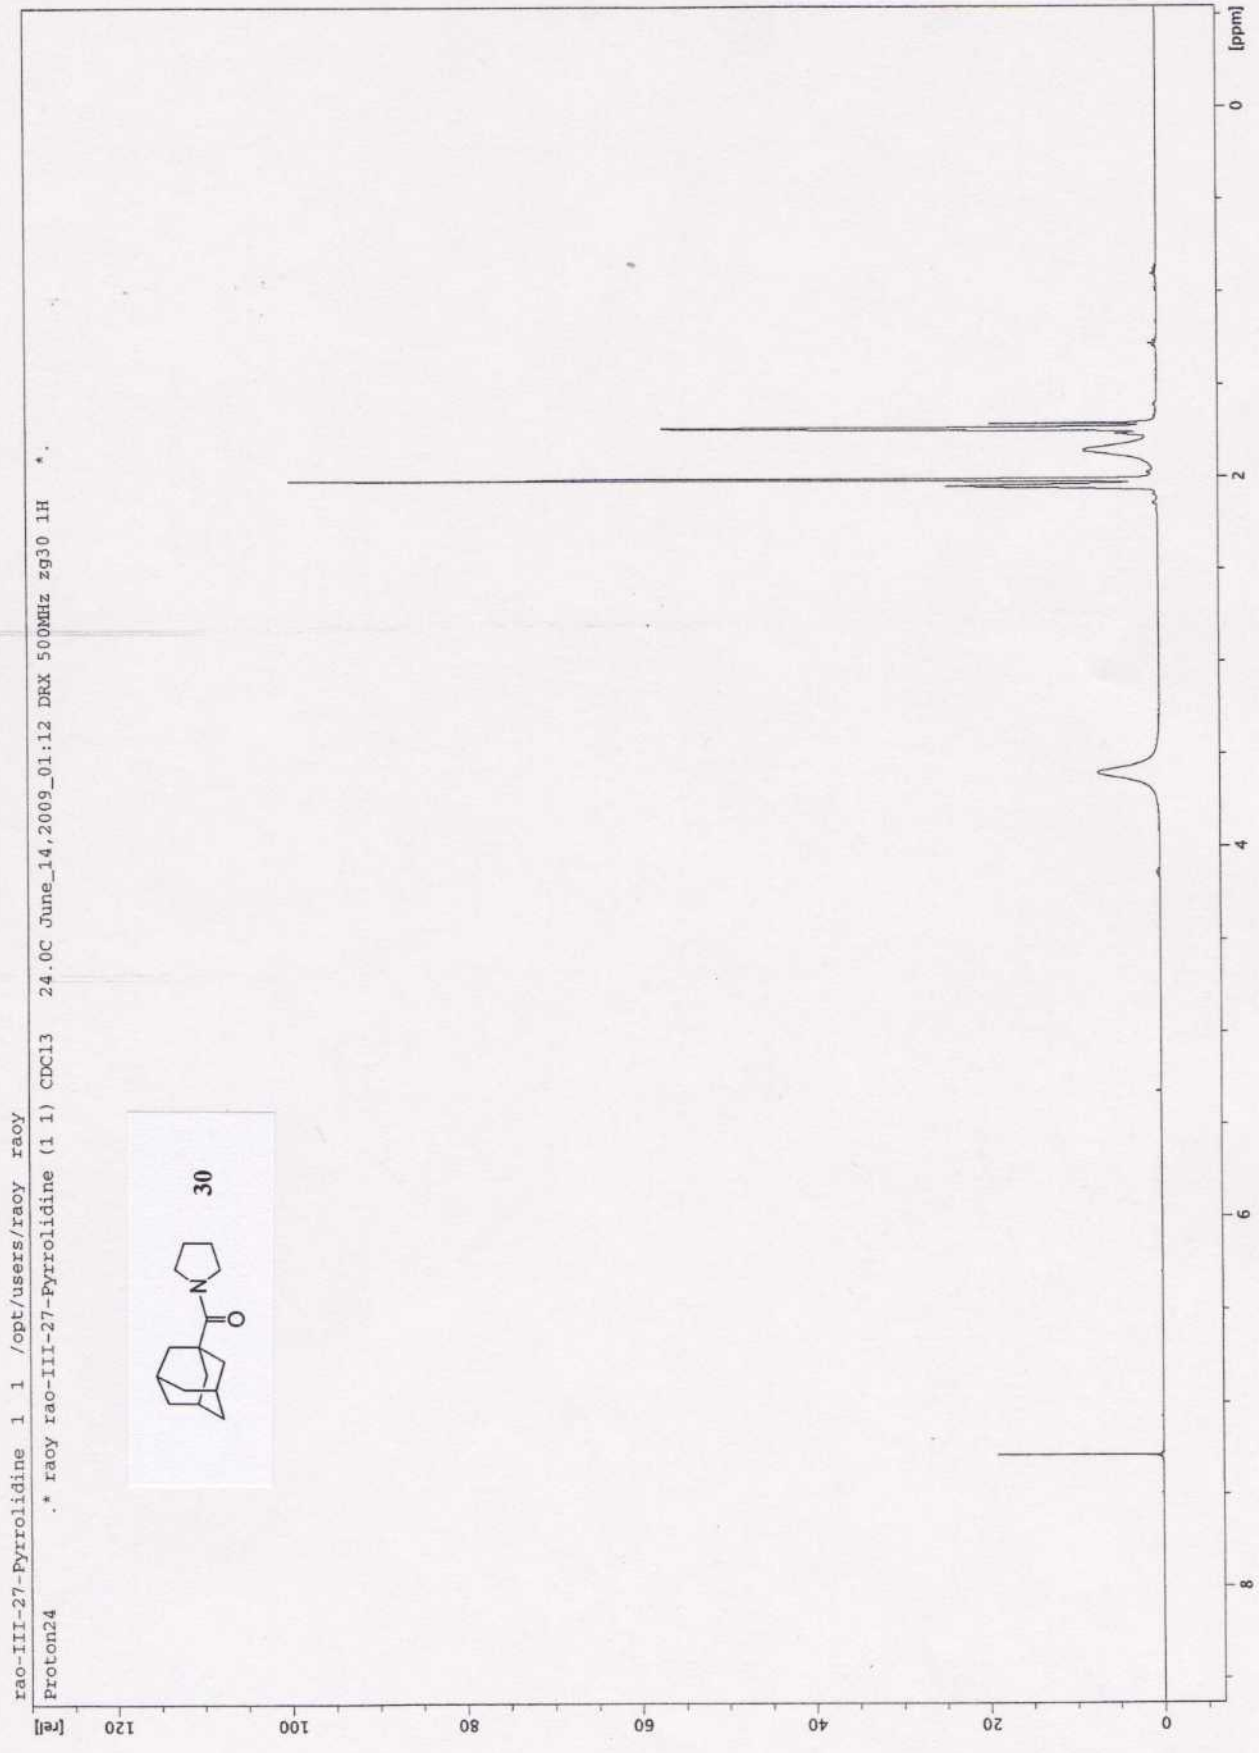

rao-III-27-Pyrrolidine-cl3 1 1 /opt/users/raoy raoy  
raol . \* raoy rao-III-27-Pyrrolidine-cl3 (1 1) MeOD 24.0C June\_14,2009\_01:35 DRX 500MHz zgpg30 13C; 1H O2=4.000 \*

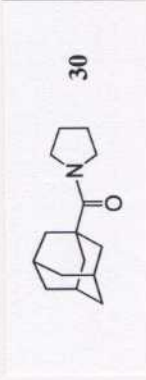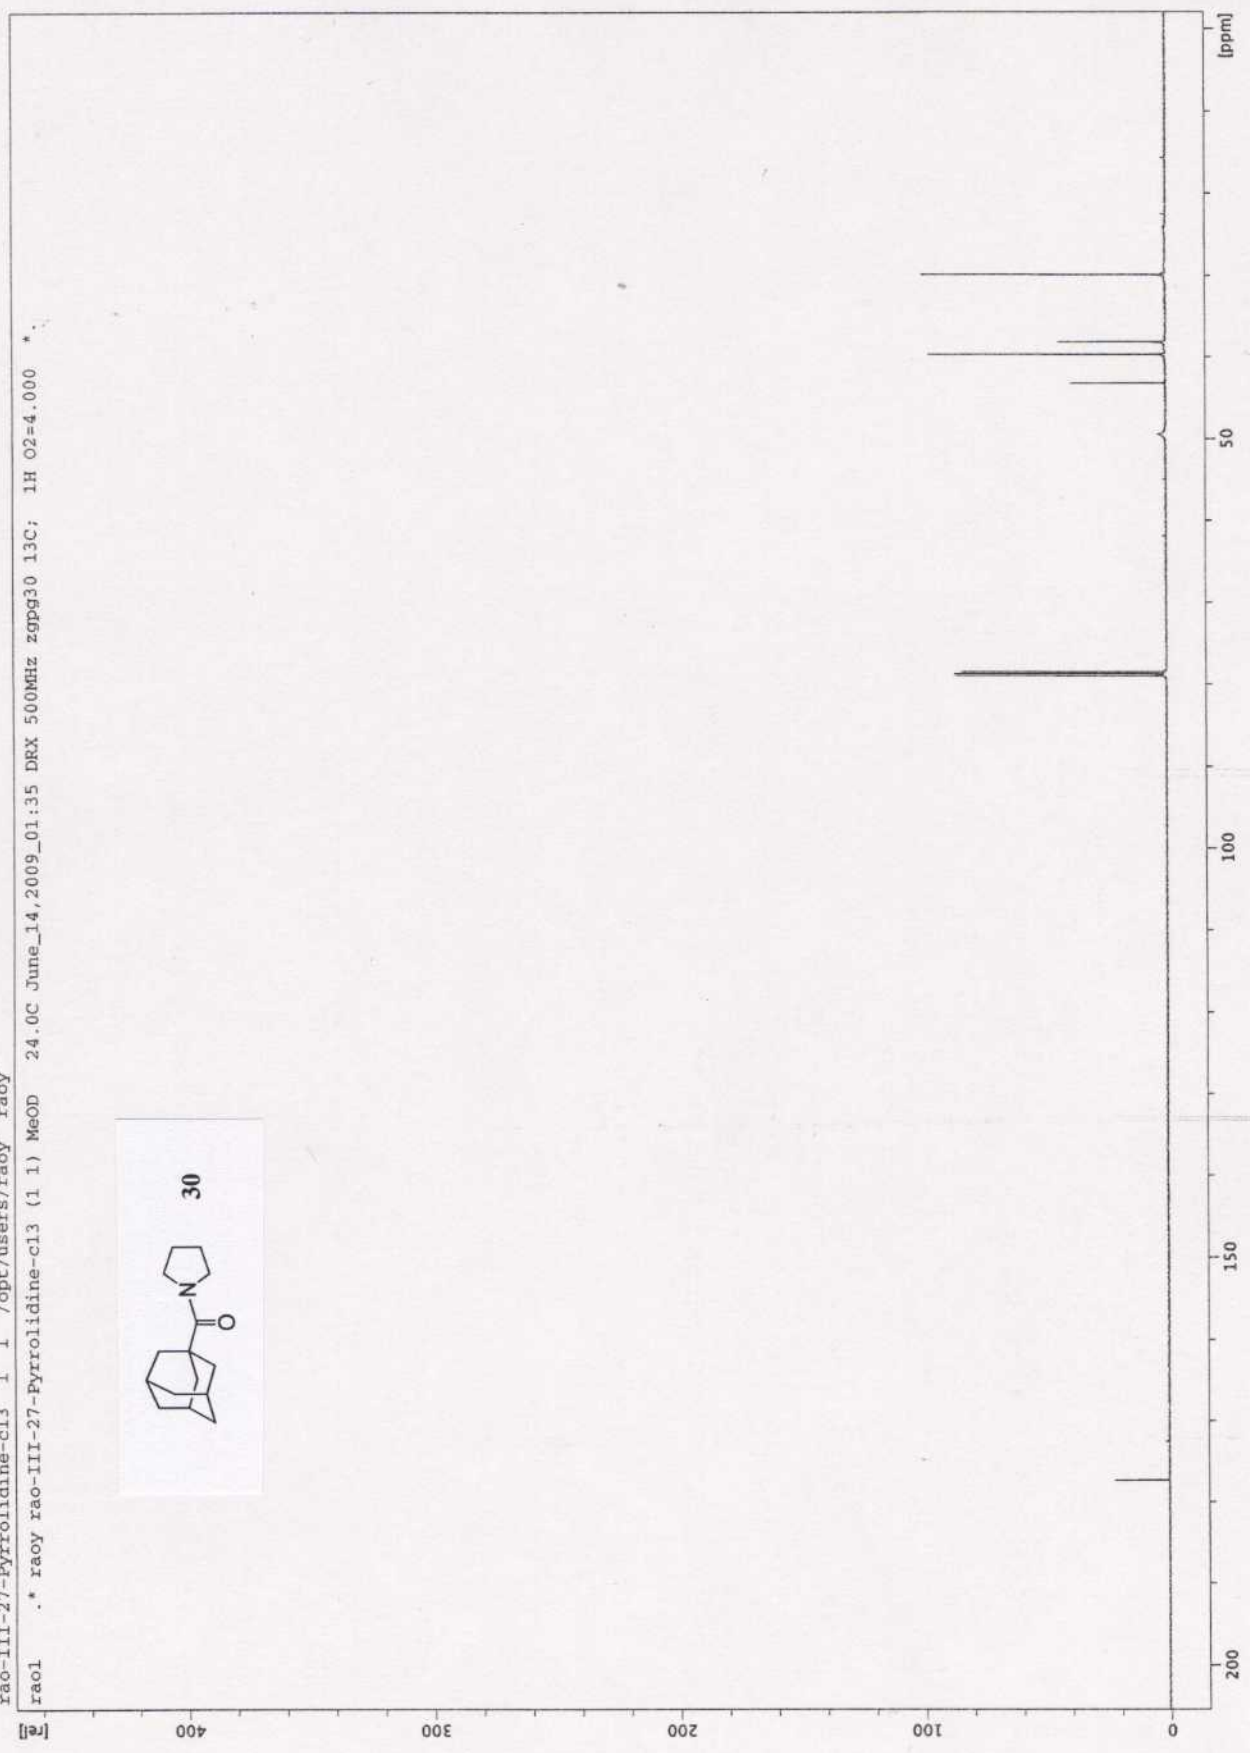



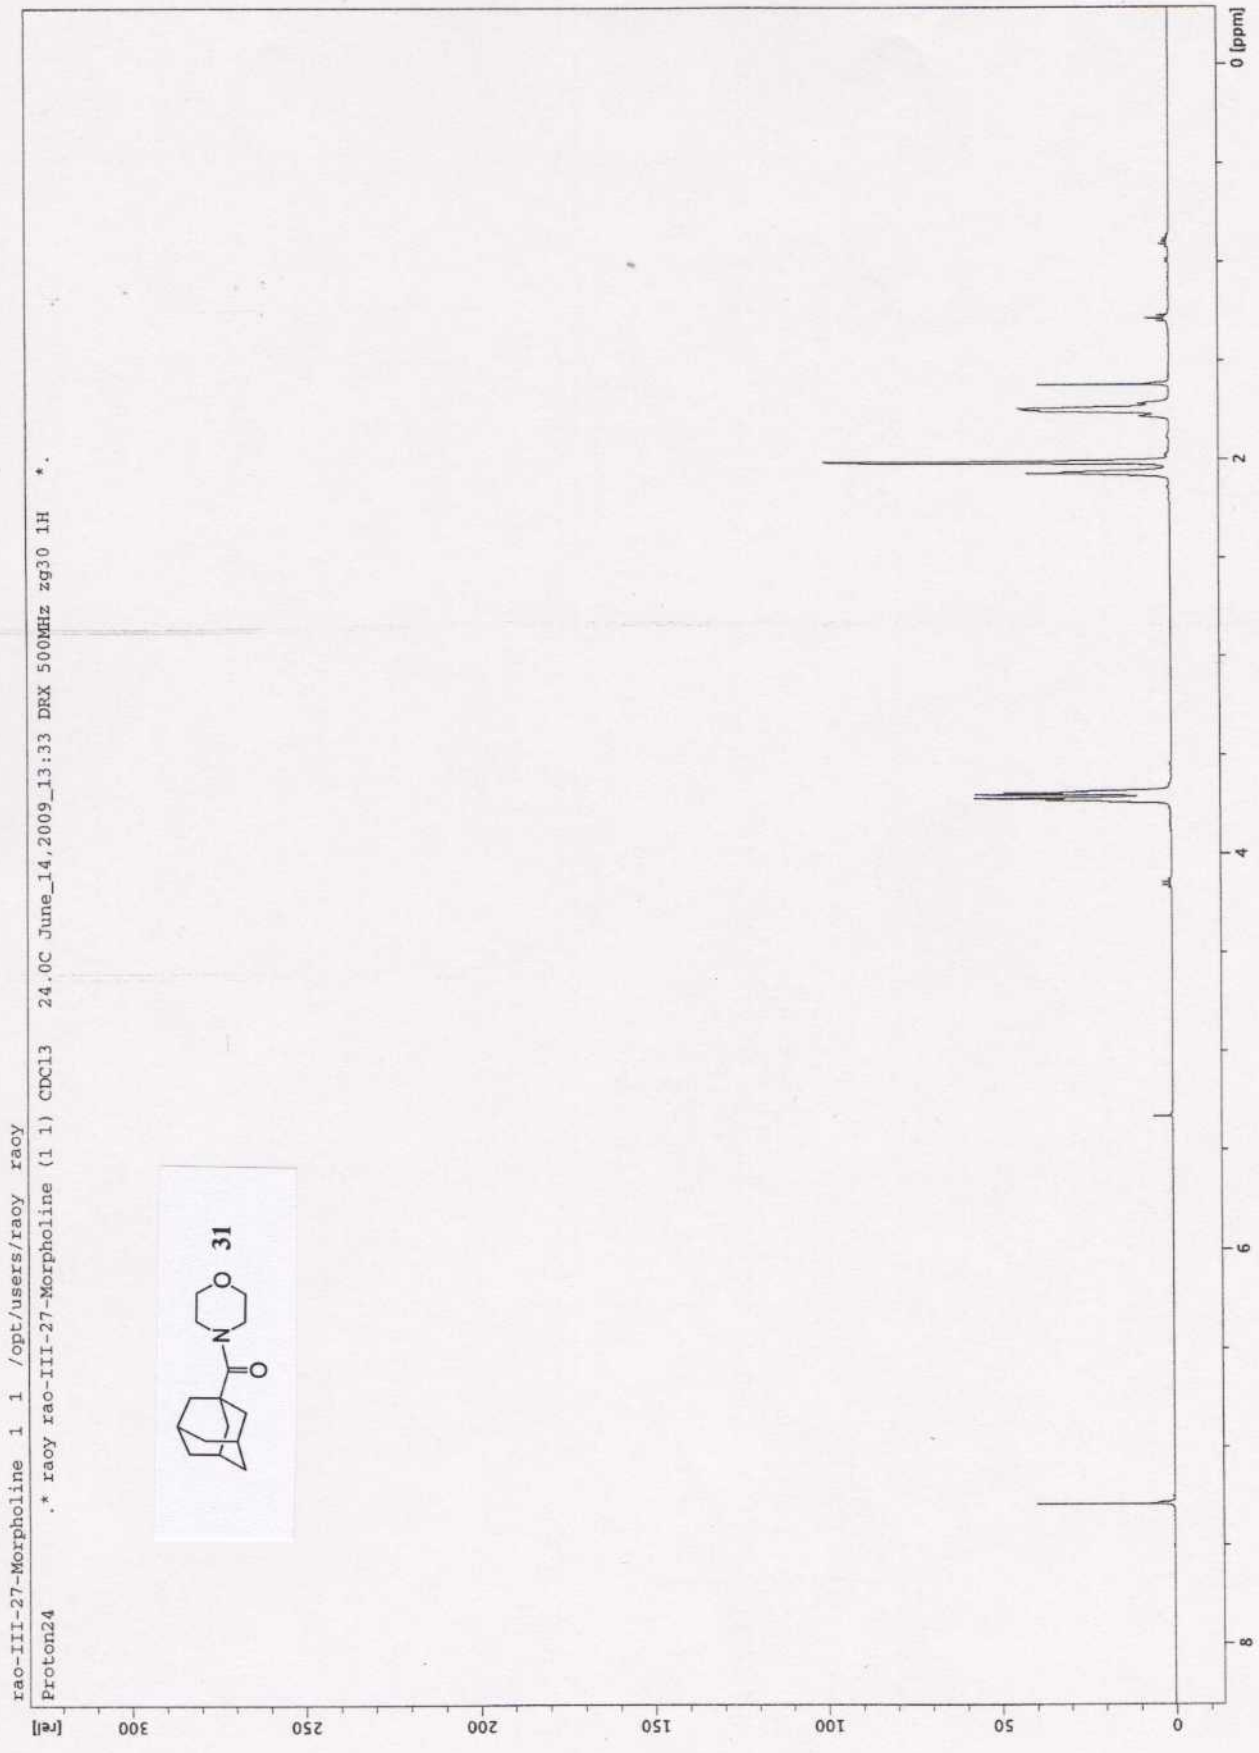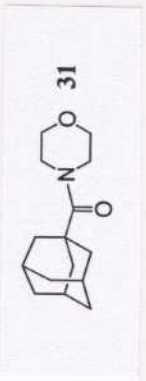

rao-III-27-Morpholine-cl3 1 1 /opt/users/raoy raoy  
raol . \* raoy rao-III-27-Morpholine-cl3 (1 1) MeOD 24.0C June\_14,2009\_15:24 DRX 500MHz zgpg30 13C; 1H O2=4.000 \*

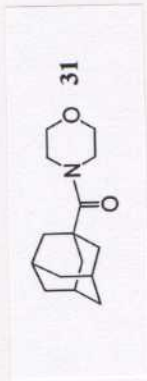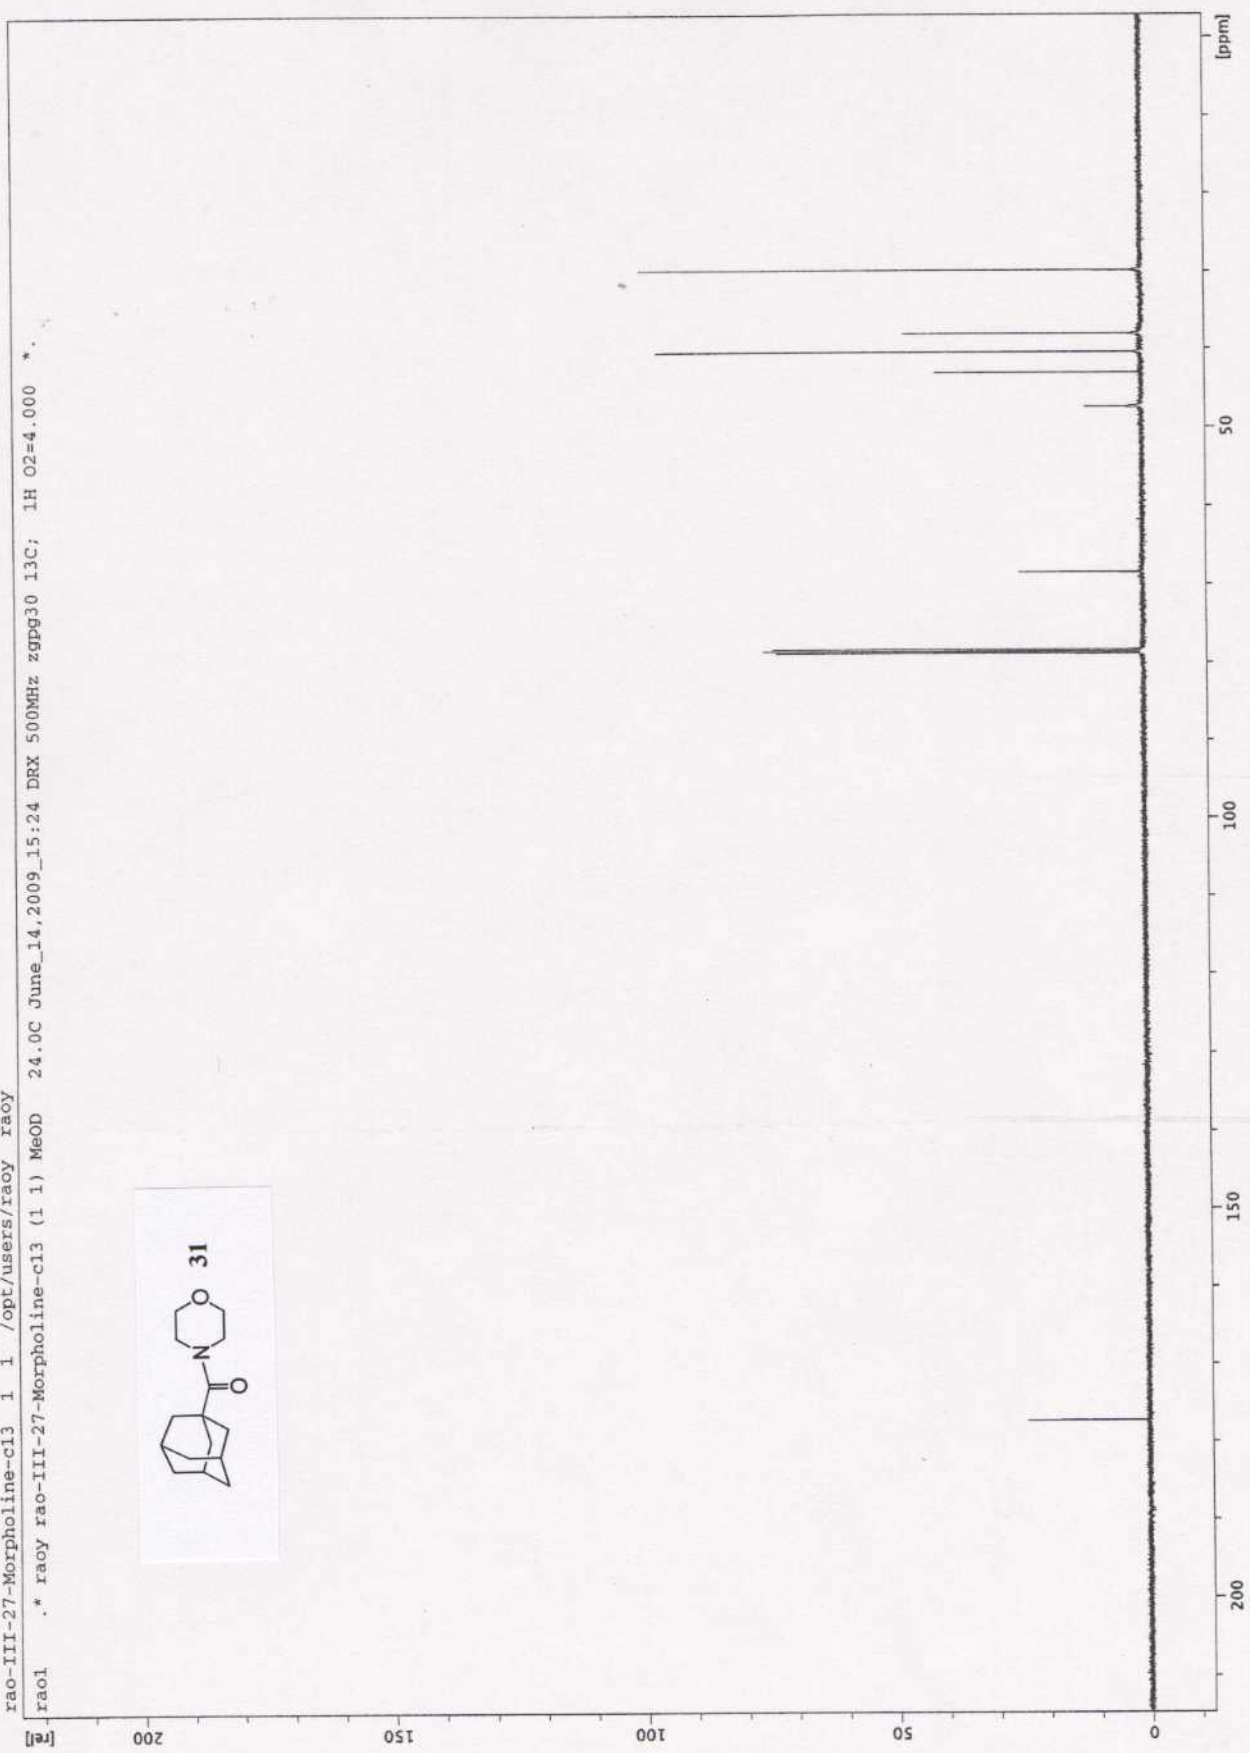

rao-III-20-pyrrolidine 10 1 /opt/users/raoy raoy  
.\* raoy rao-III-20-pyrrolidine (10 1) CDCl3 24.0C June\_11,2009\_11:52:36 Bruker AVII+ 600MHz RRL1326: zg30 : 1H 7.500 ppm \*

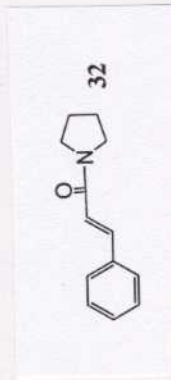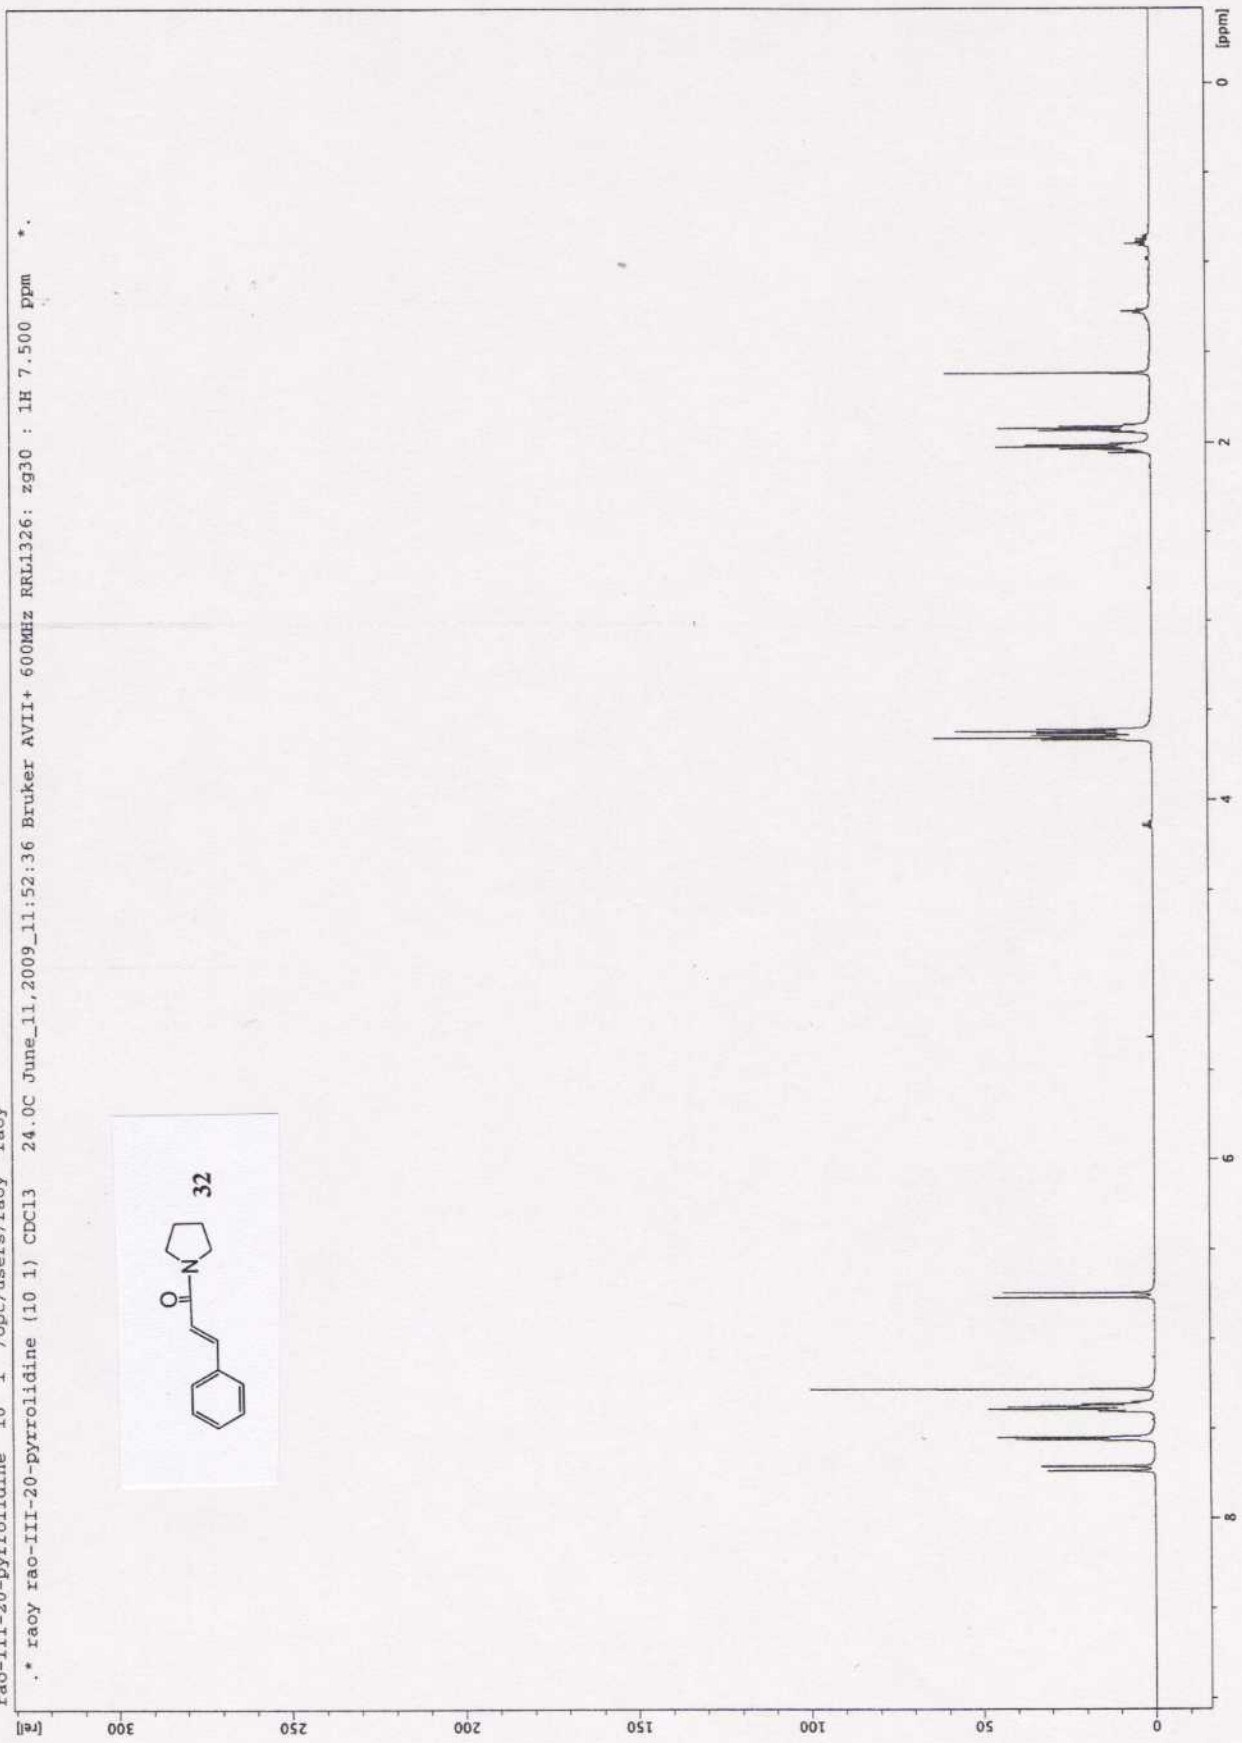

rao-III-20-Pyrrolidine 10 1 /opt/users/raoy raoy

\* raoy rao-III-20-Pyrrolidine (10 1) CDC13 24.1C June\_11,2009\_12:40:50 Bruker AVII+ 600MHz RRL1326: zgpg30 : 13C 110.000 ppm; 1H 4.500 ppm \*

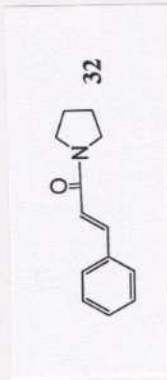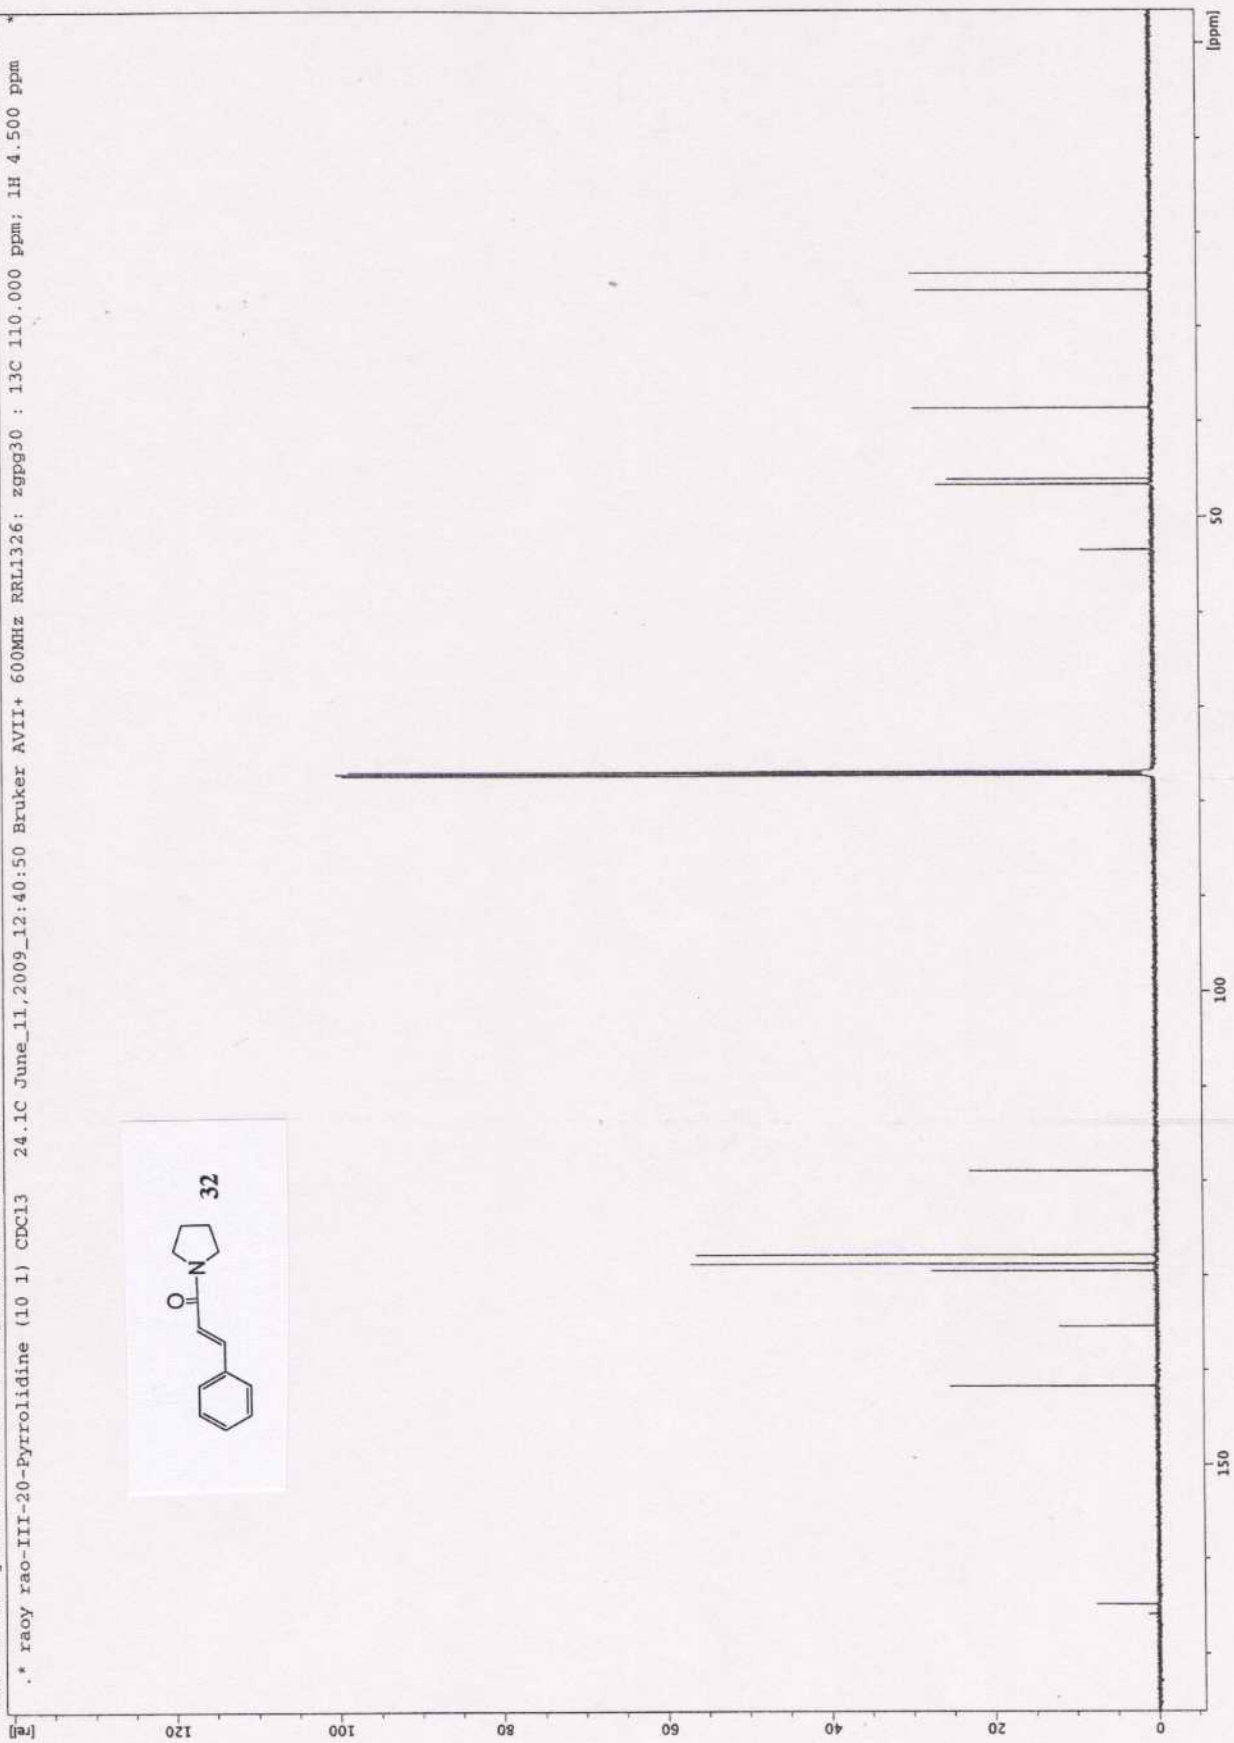

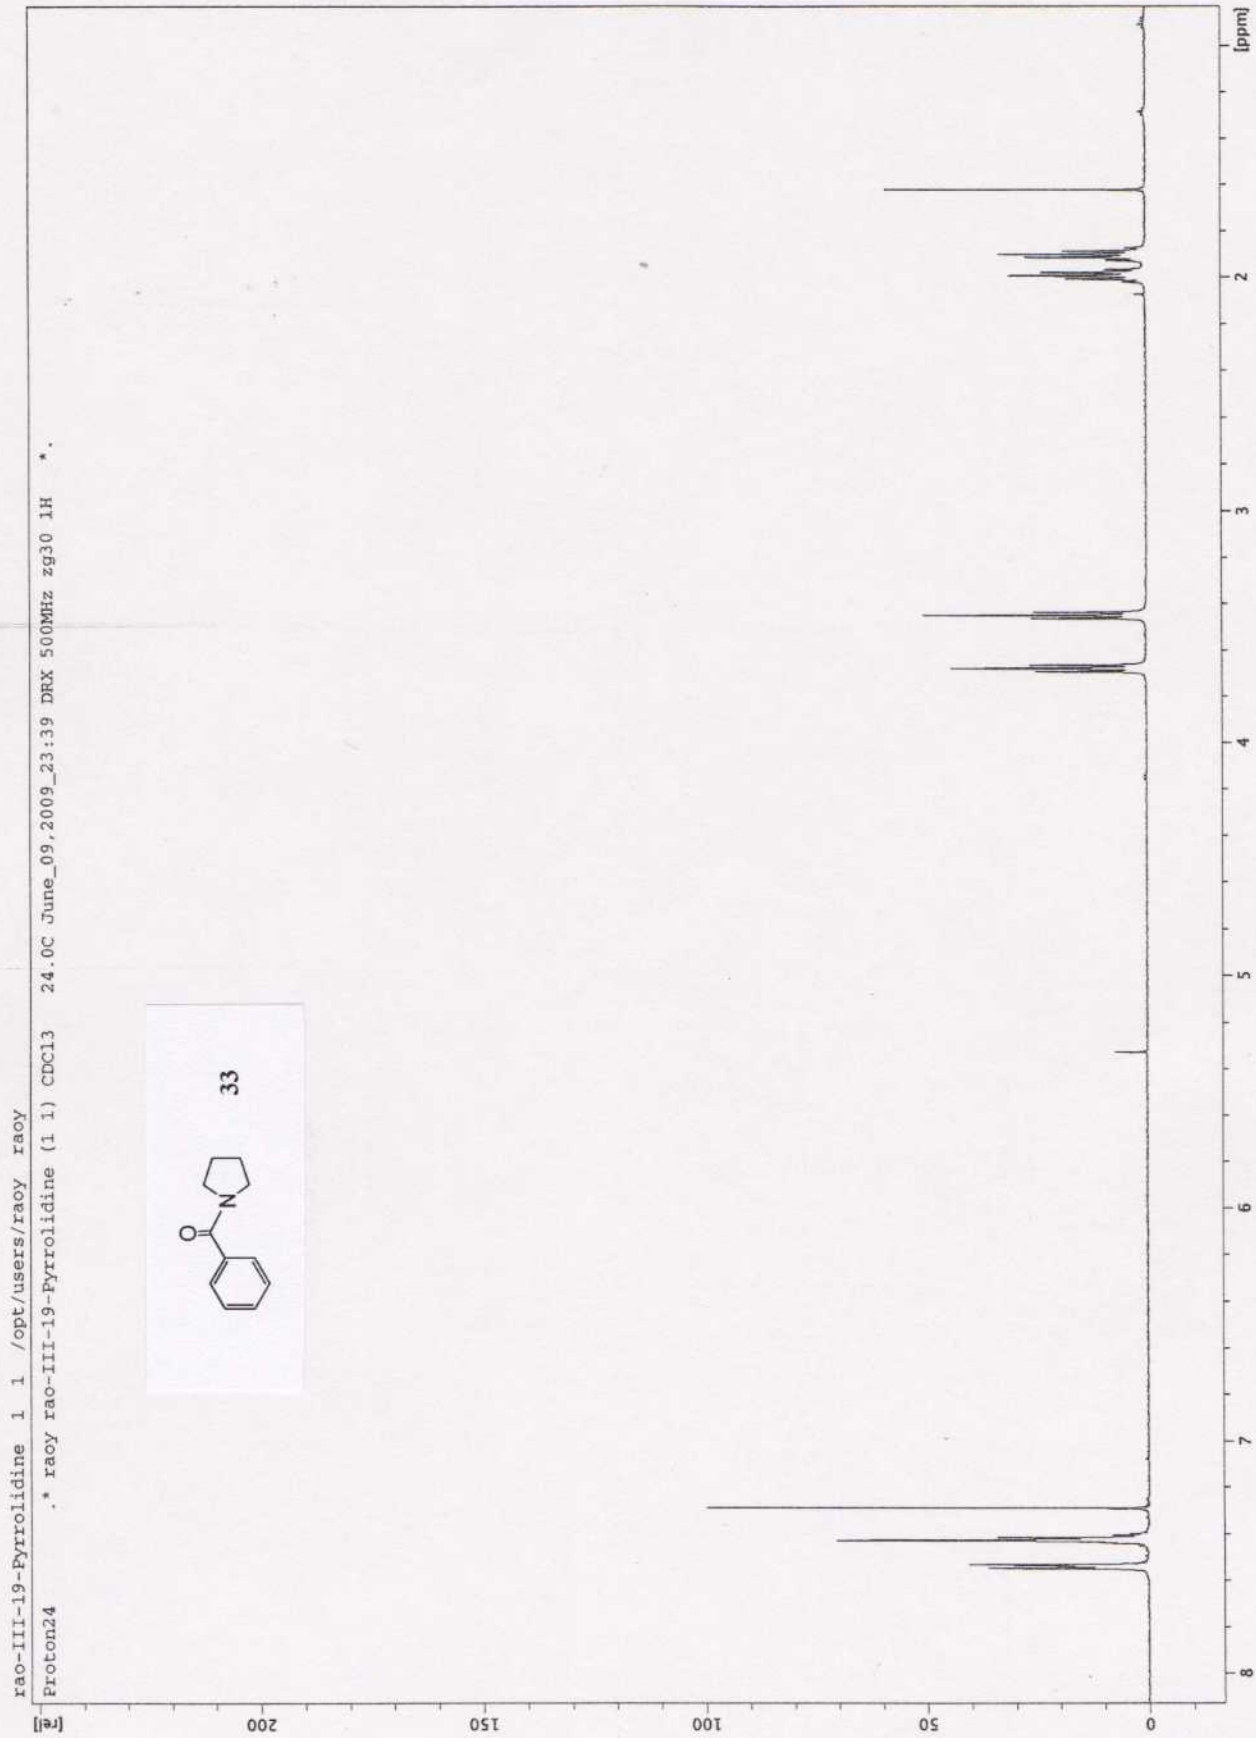

rao-III-19-Pyrrolidine 10 1 /opt/users/raoy raoy  
.\* raoy rao-III-19-Pyrrolidine (10 1) CDC13 24.1c June\_10,2009\_02:22:18 Bruker AVII+ 600MHz RRL1326: zpgg30 : 13C 110.000 ppm; 1H 4.500 ppm

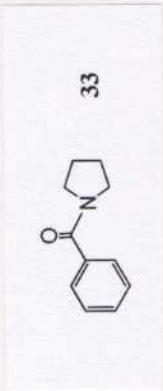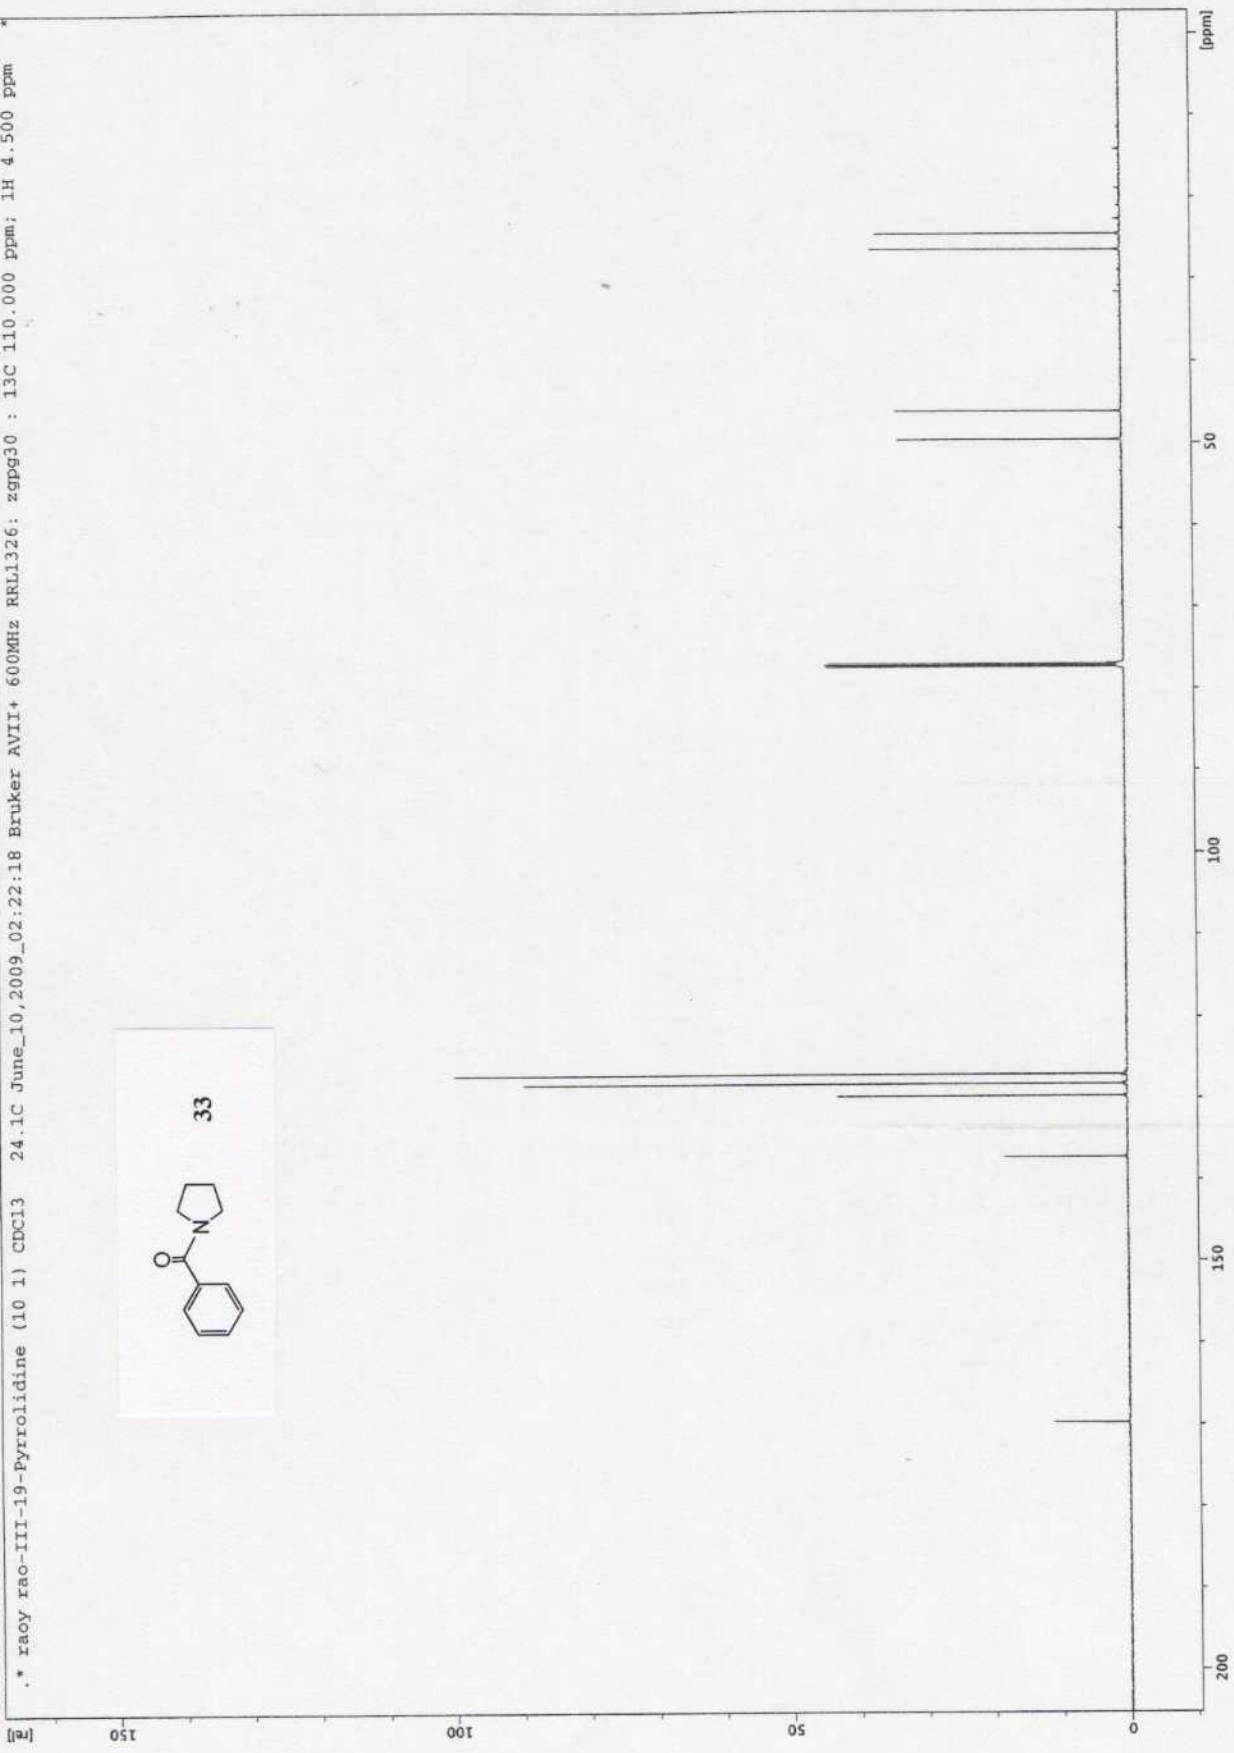

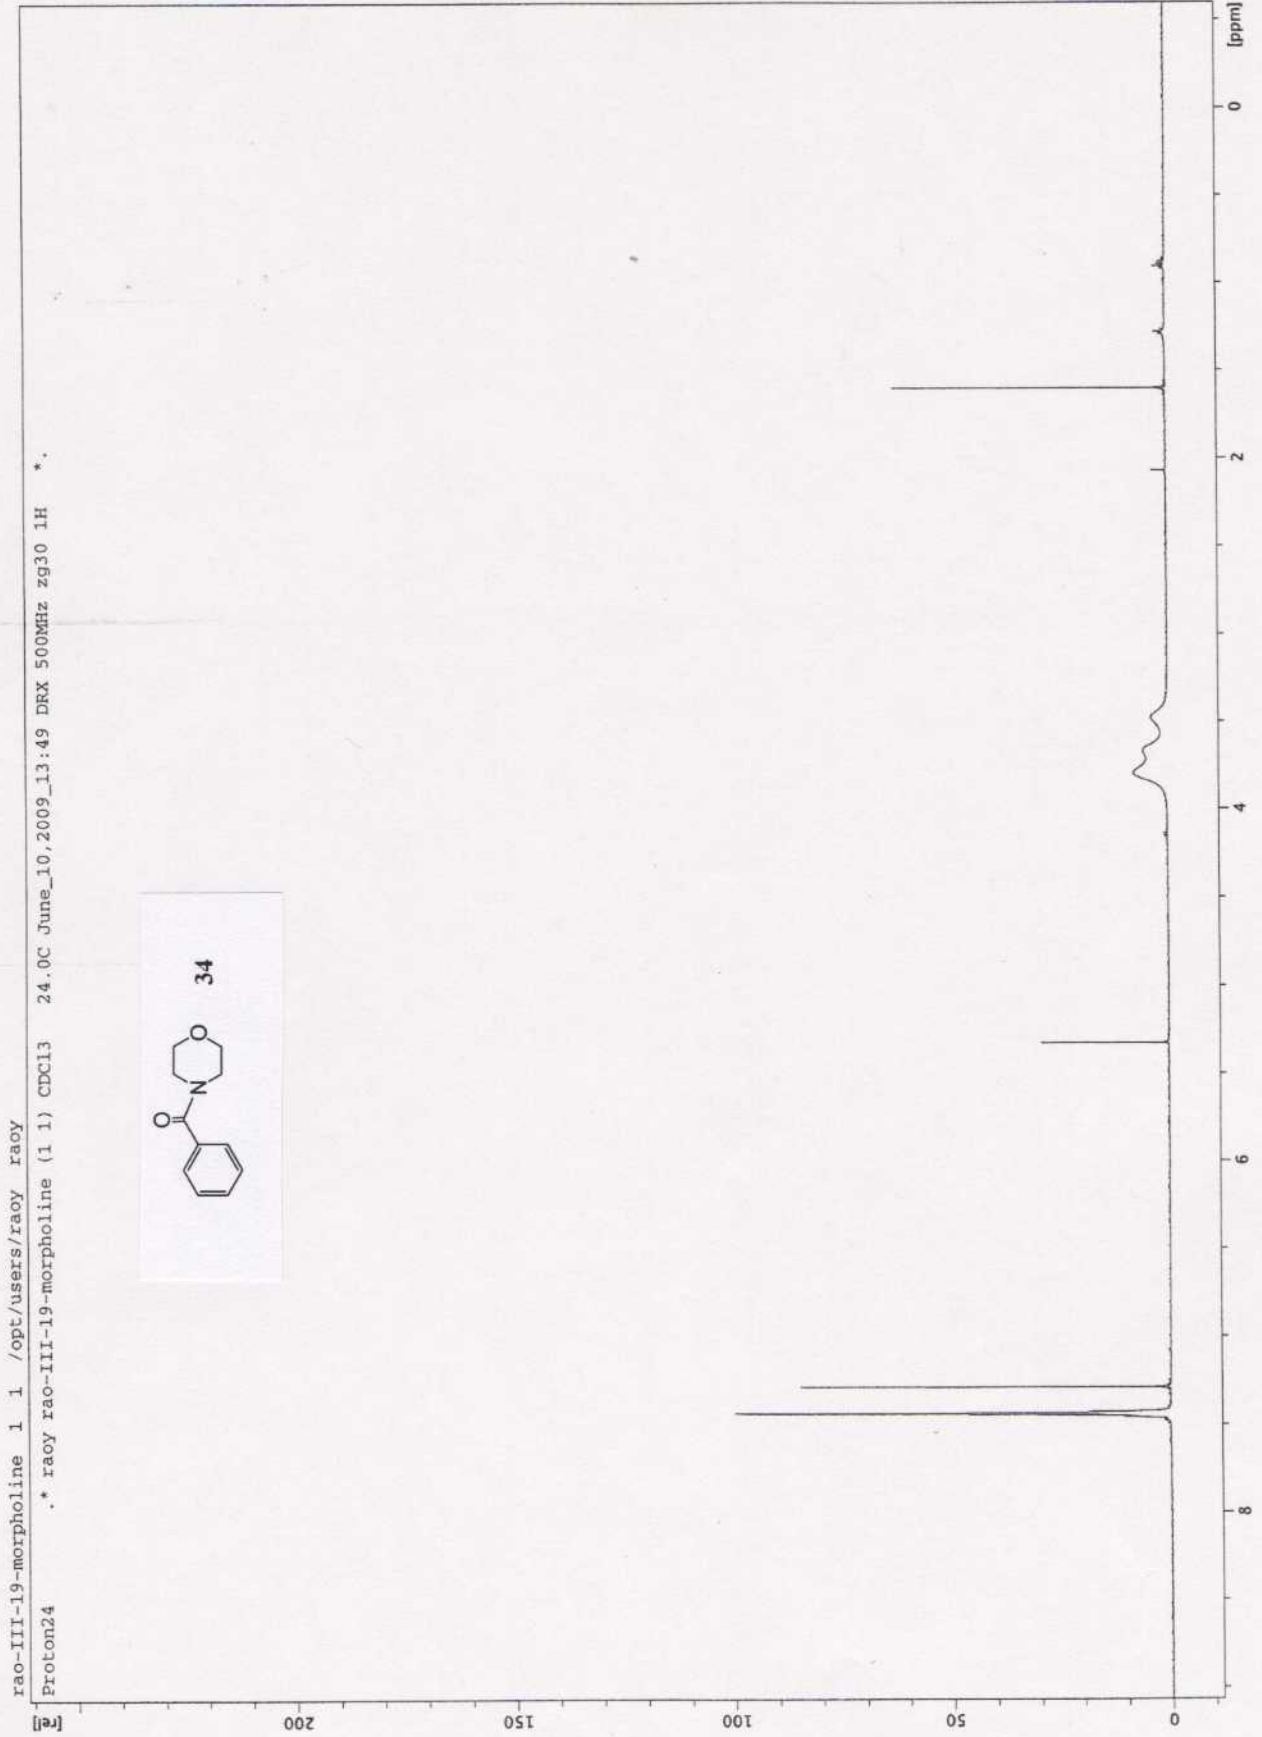

rao-III-19-Morpholine 10 1 /opt/users/raoy raoy  
\*. \* raoy rao-III-19-Morpholine (10 1) CDCl3 24.1C June\_10,2009\_15:03:27 Bruker AVII+ 600MHz RRL1326: zgpg30 : 13C 110.000 ppm; 1H 4.500 ppm \*

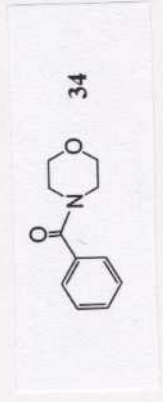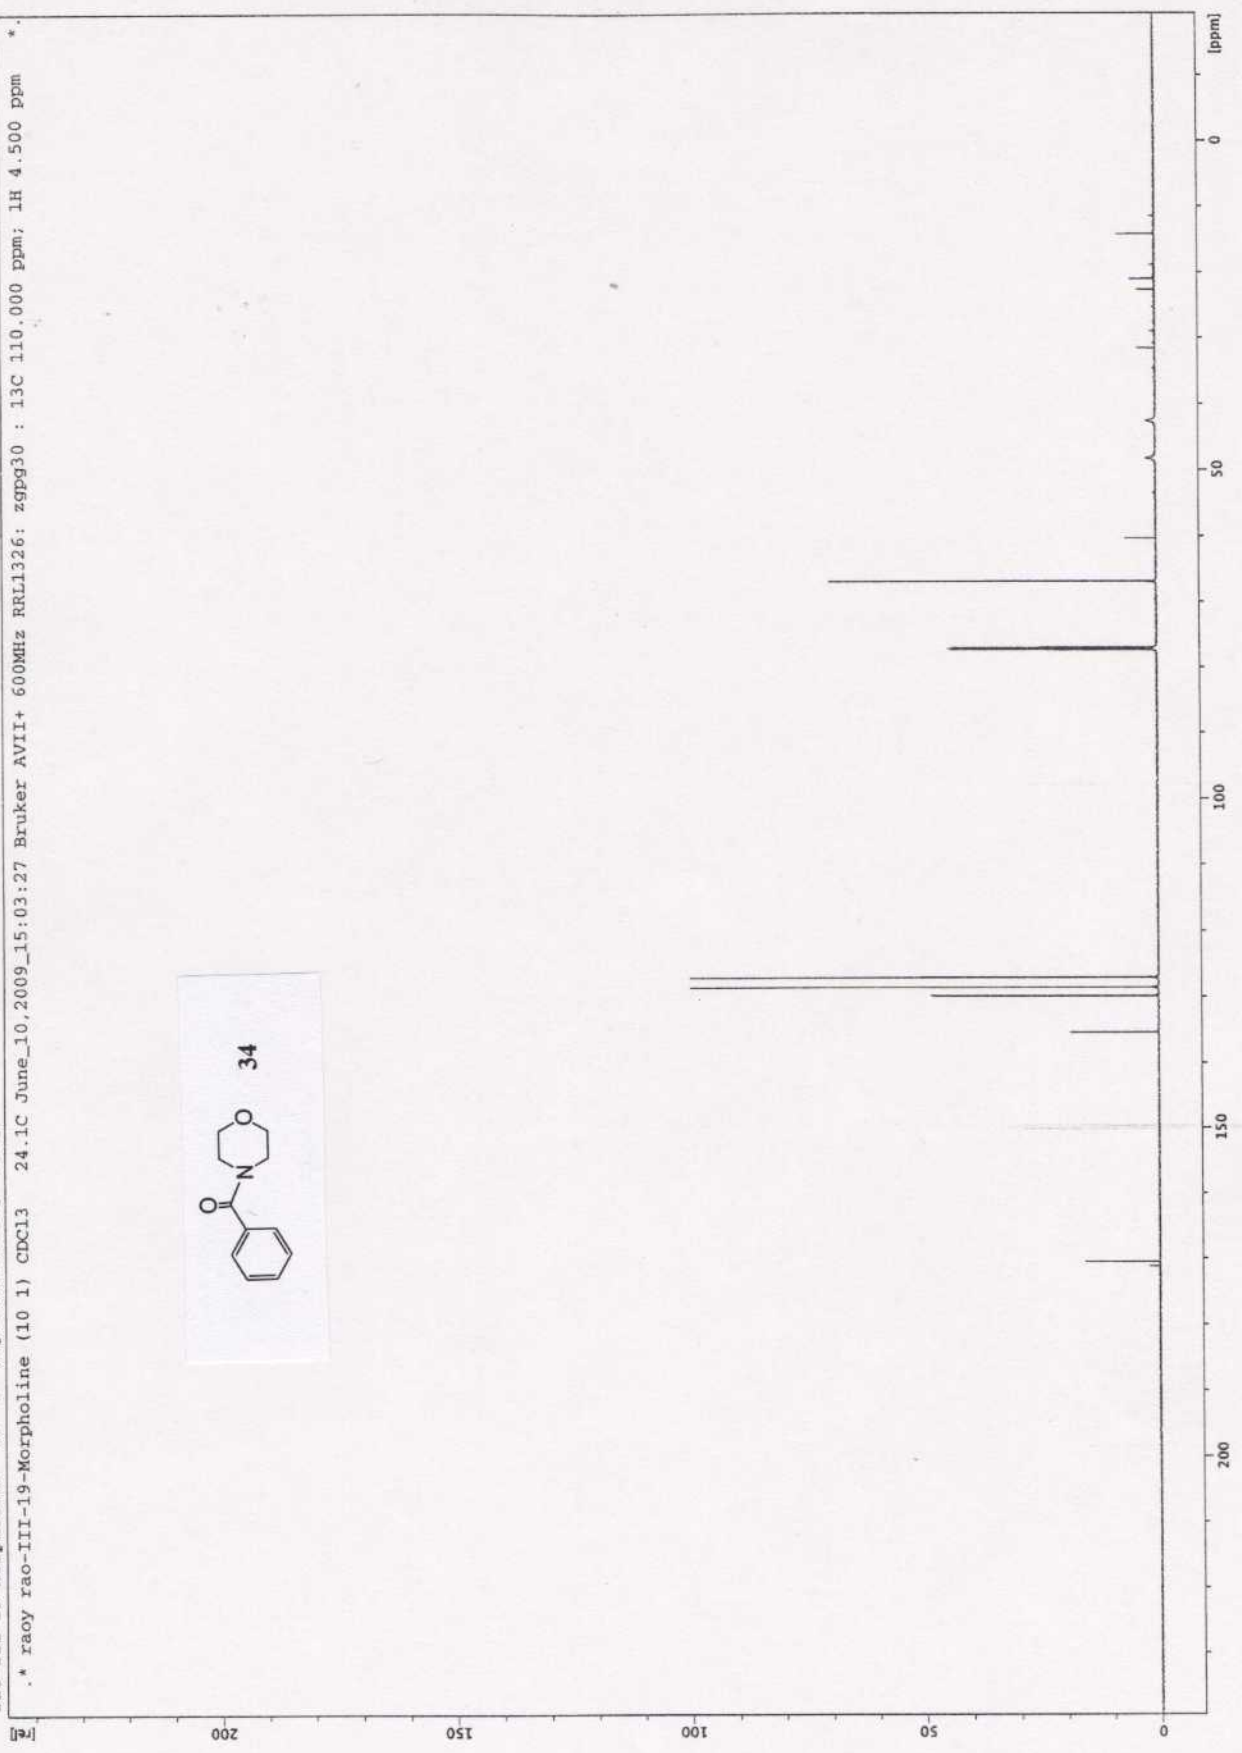



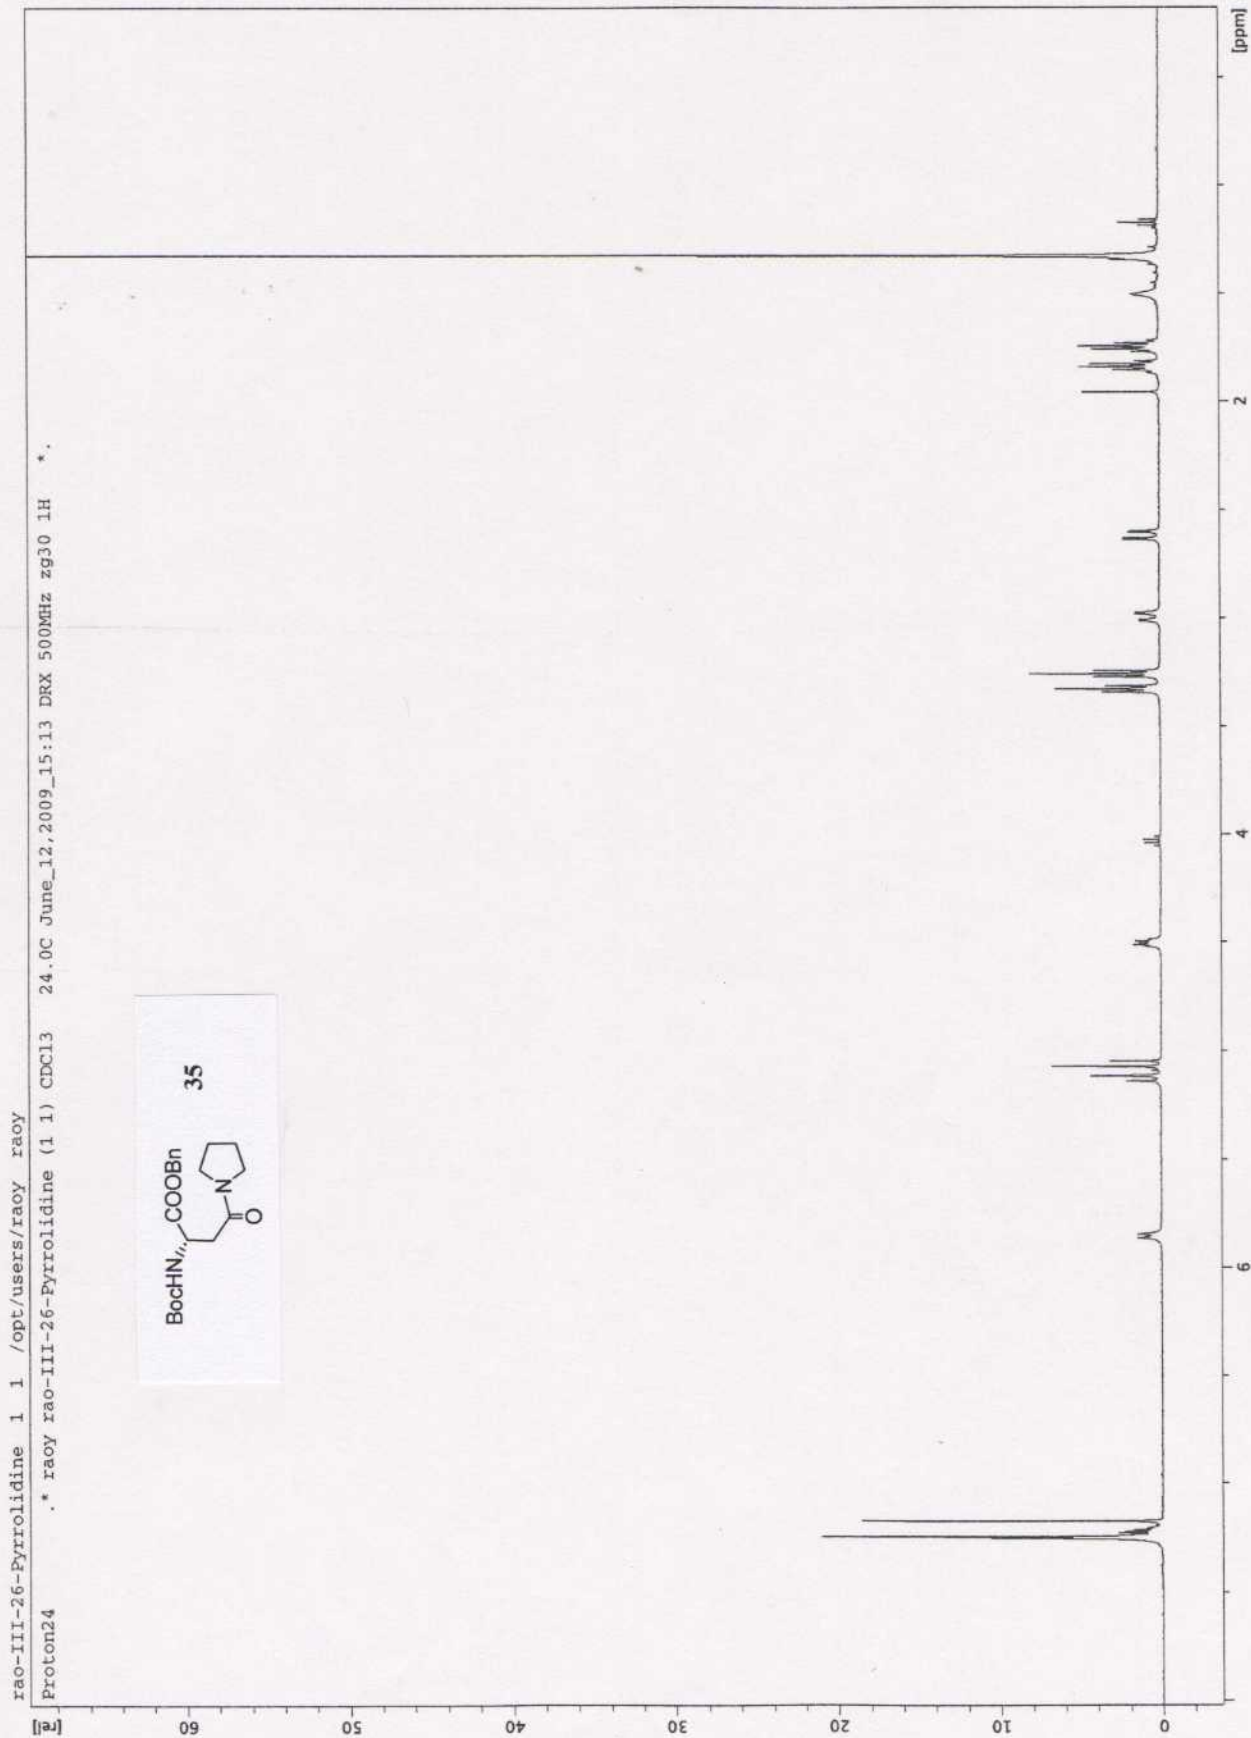

rac-III-26-Pyrrolidine 10 1 /opt/users/raoy raoy

\* raoy rac-III-26-Pyrrolidine (10 1) CDCl3 24.1C June\_12,2009\_21:26:45 Bruker AVII+ 600MHz RRL1326; zgpg30 : 13C 110.000 ppm; 1H 4.500 ppm

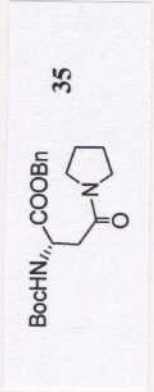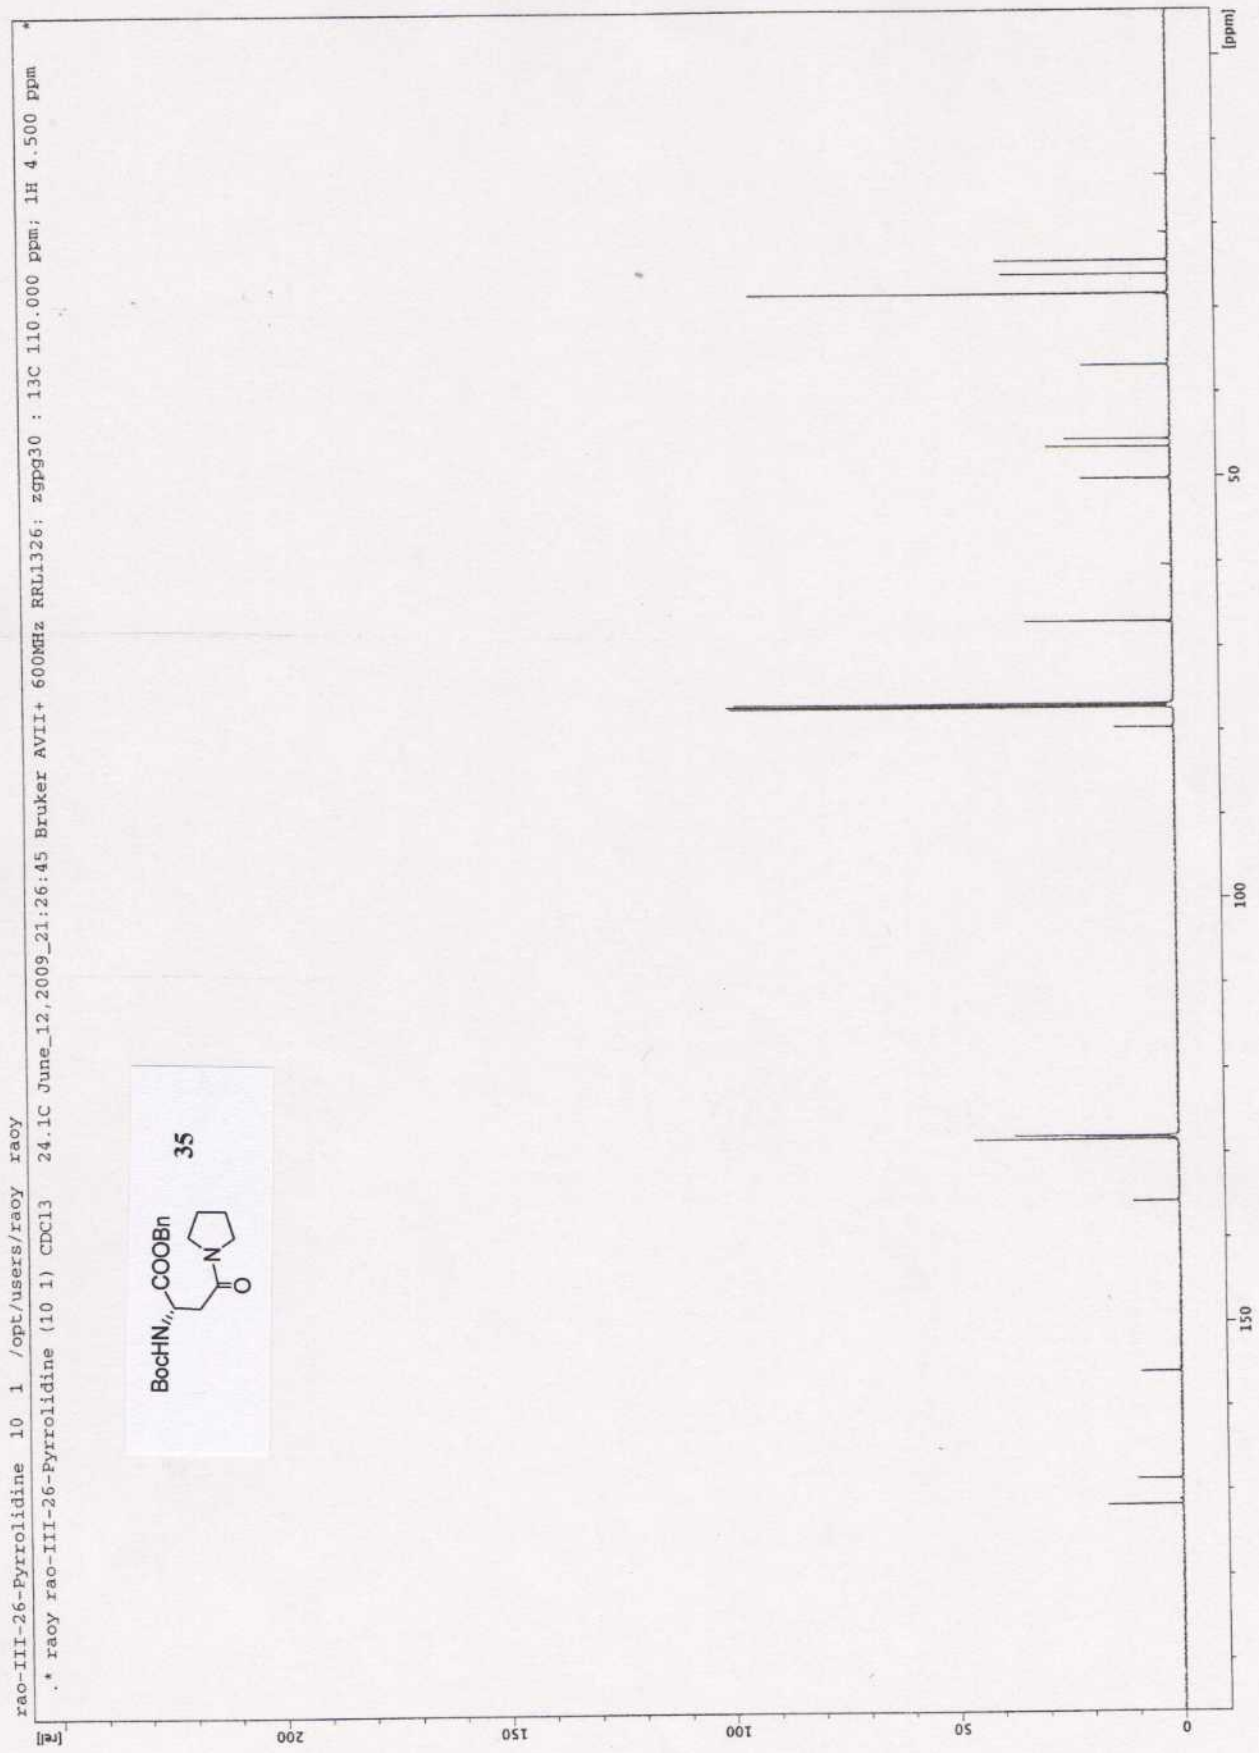



rac-III-26-Morpholine 10 1 /opt/users/raoy raoy  
.\* raoy rac-III-26-Morpholine (10 1) CDC13 24.1C June\_13,2009\_15:02:44 Bruker AVII+ 600MHz RRL1326: zgpg30 : 13C 110.000 ppm; 1H 4.500 ppm \*

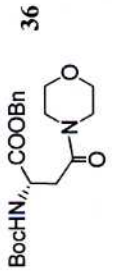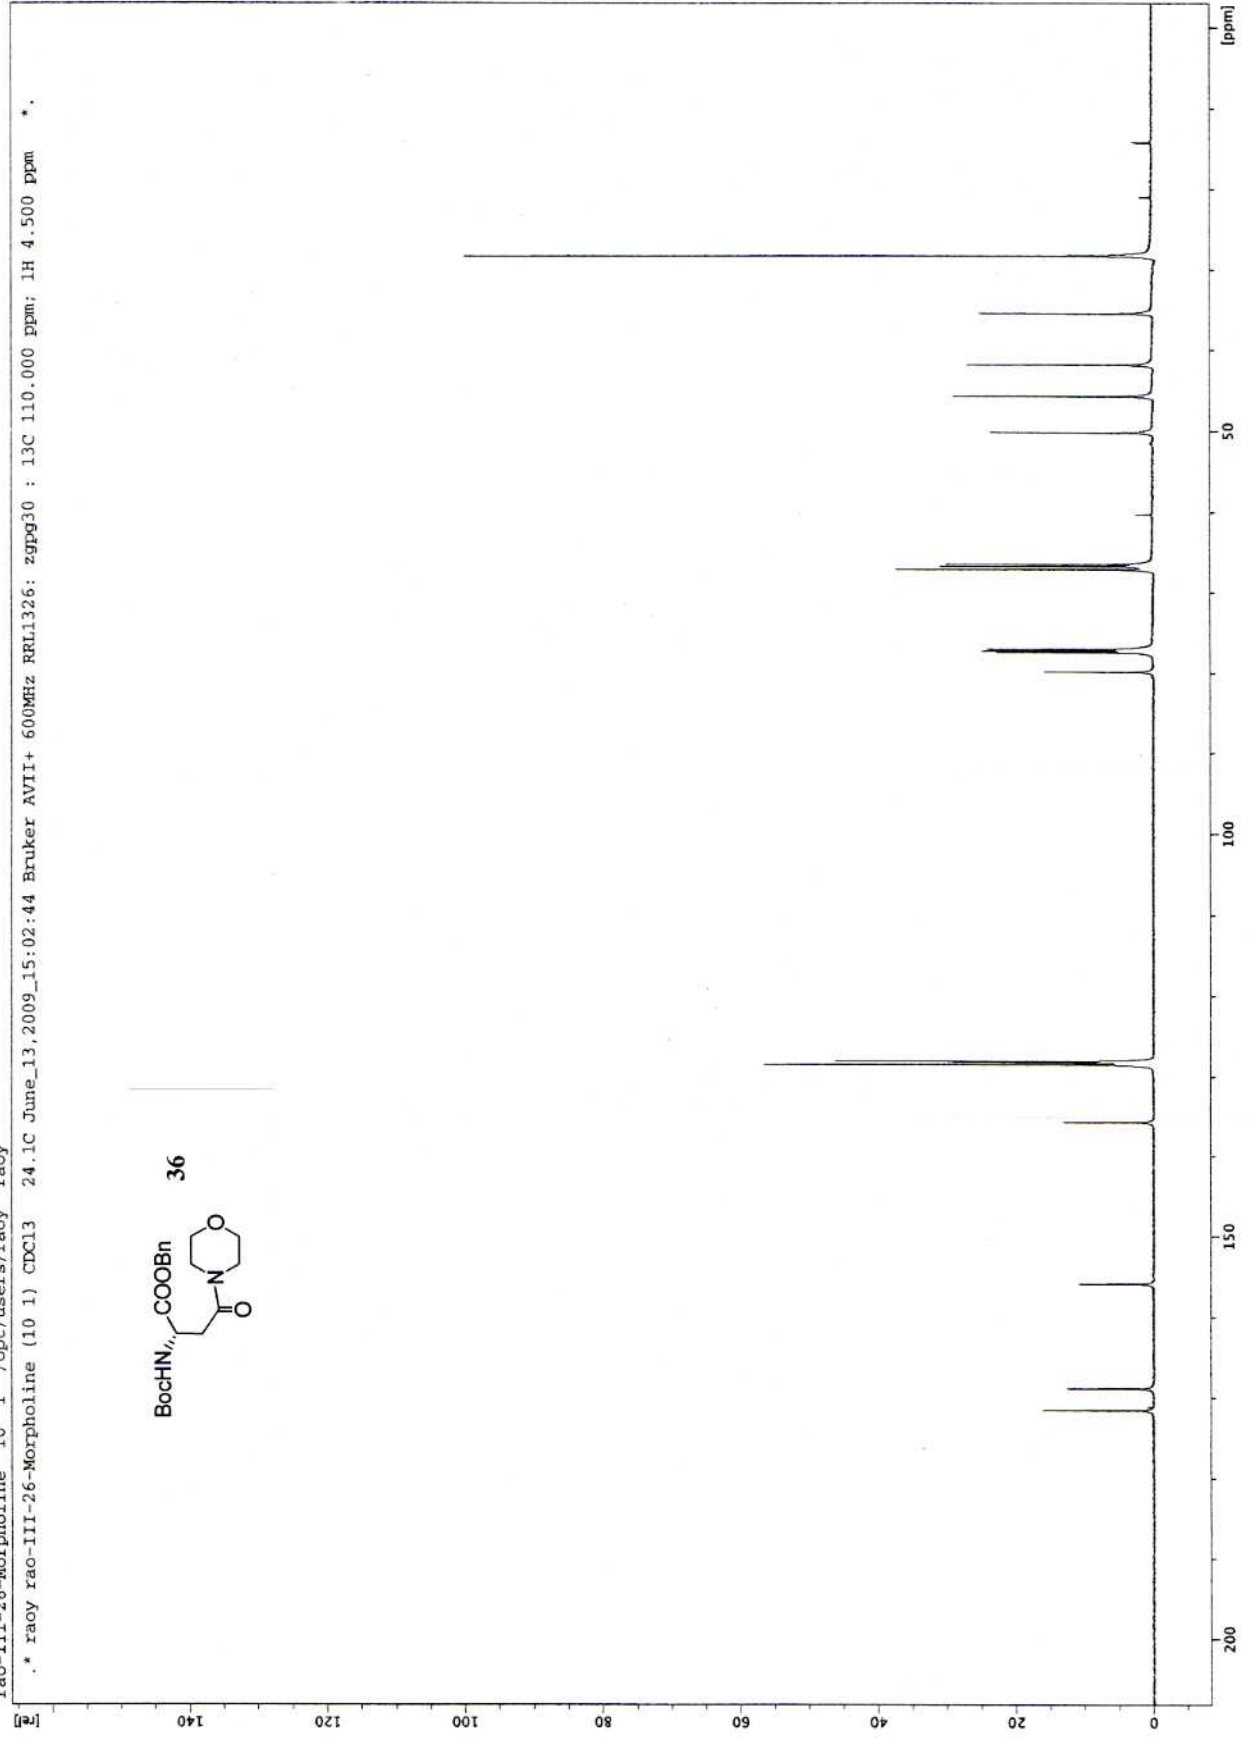

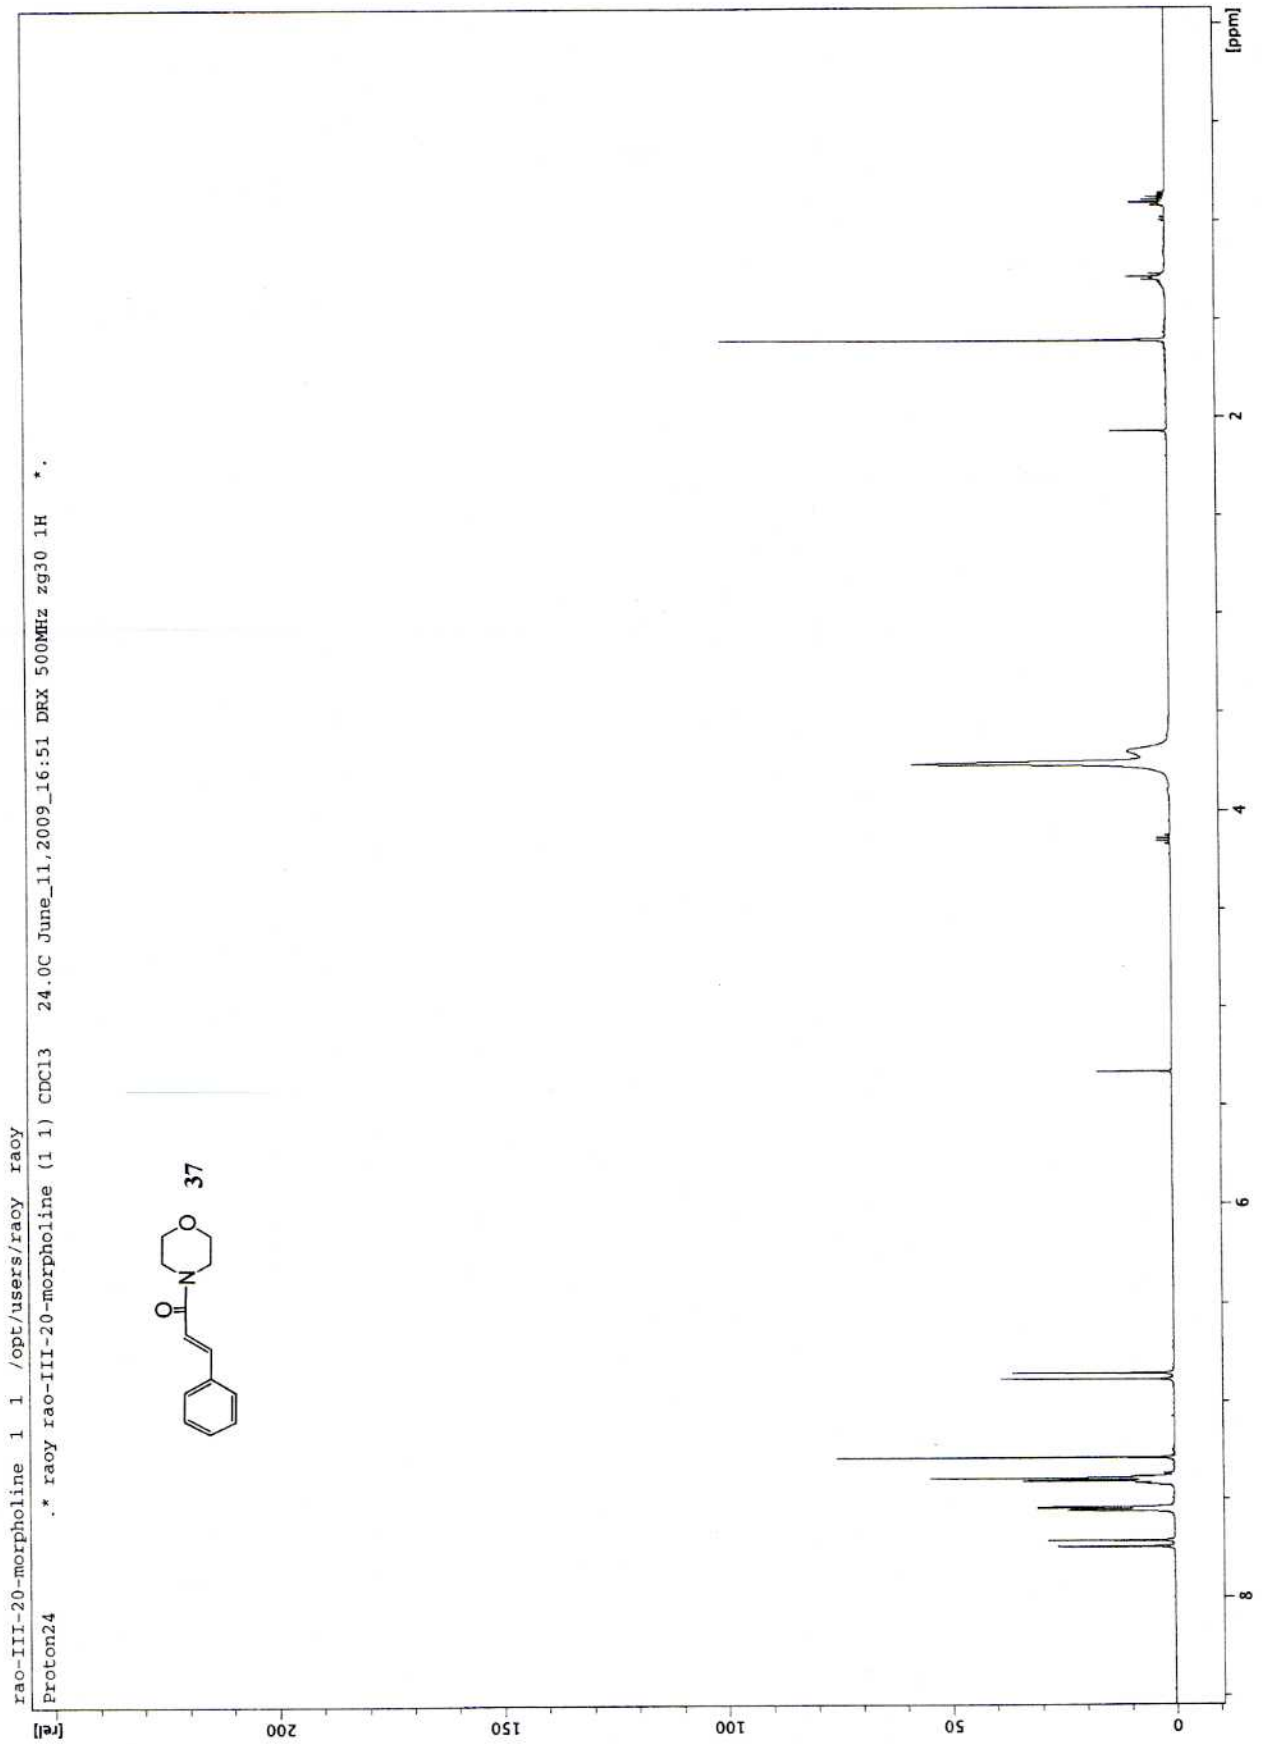

rao-III-20-Morpholine-cl3 1 1 /opt/users/raoy raoy  
raol . \* raoy rao-III-20-Morpholine-cl3 (1 1) CDC13 24.0C June\_11,2009\_22:26 DRX 500MHz zgpg30 13C; 1H O2=4.000 \*

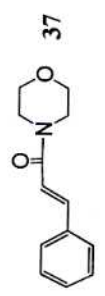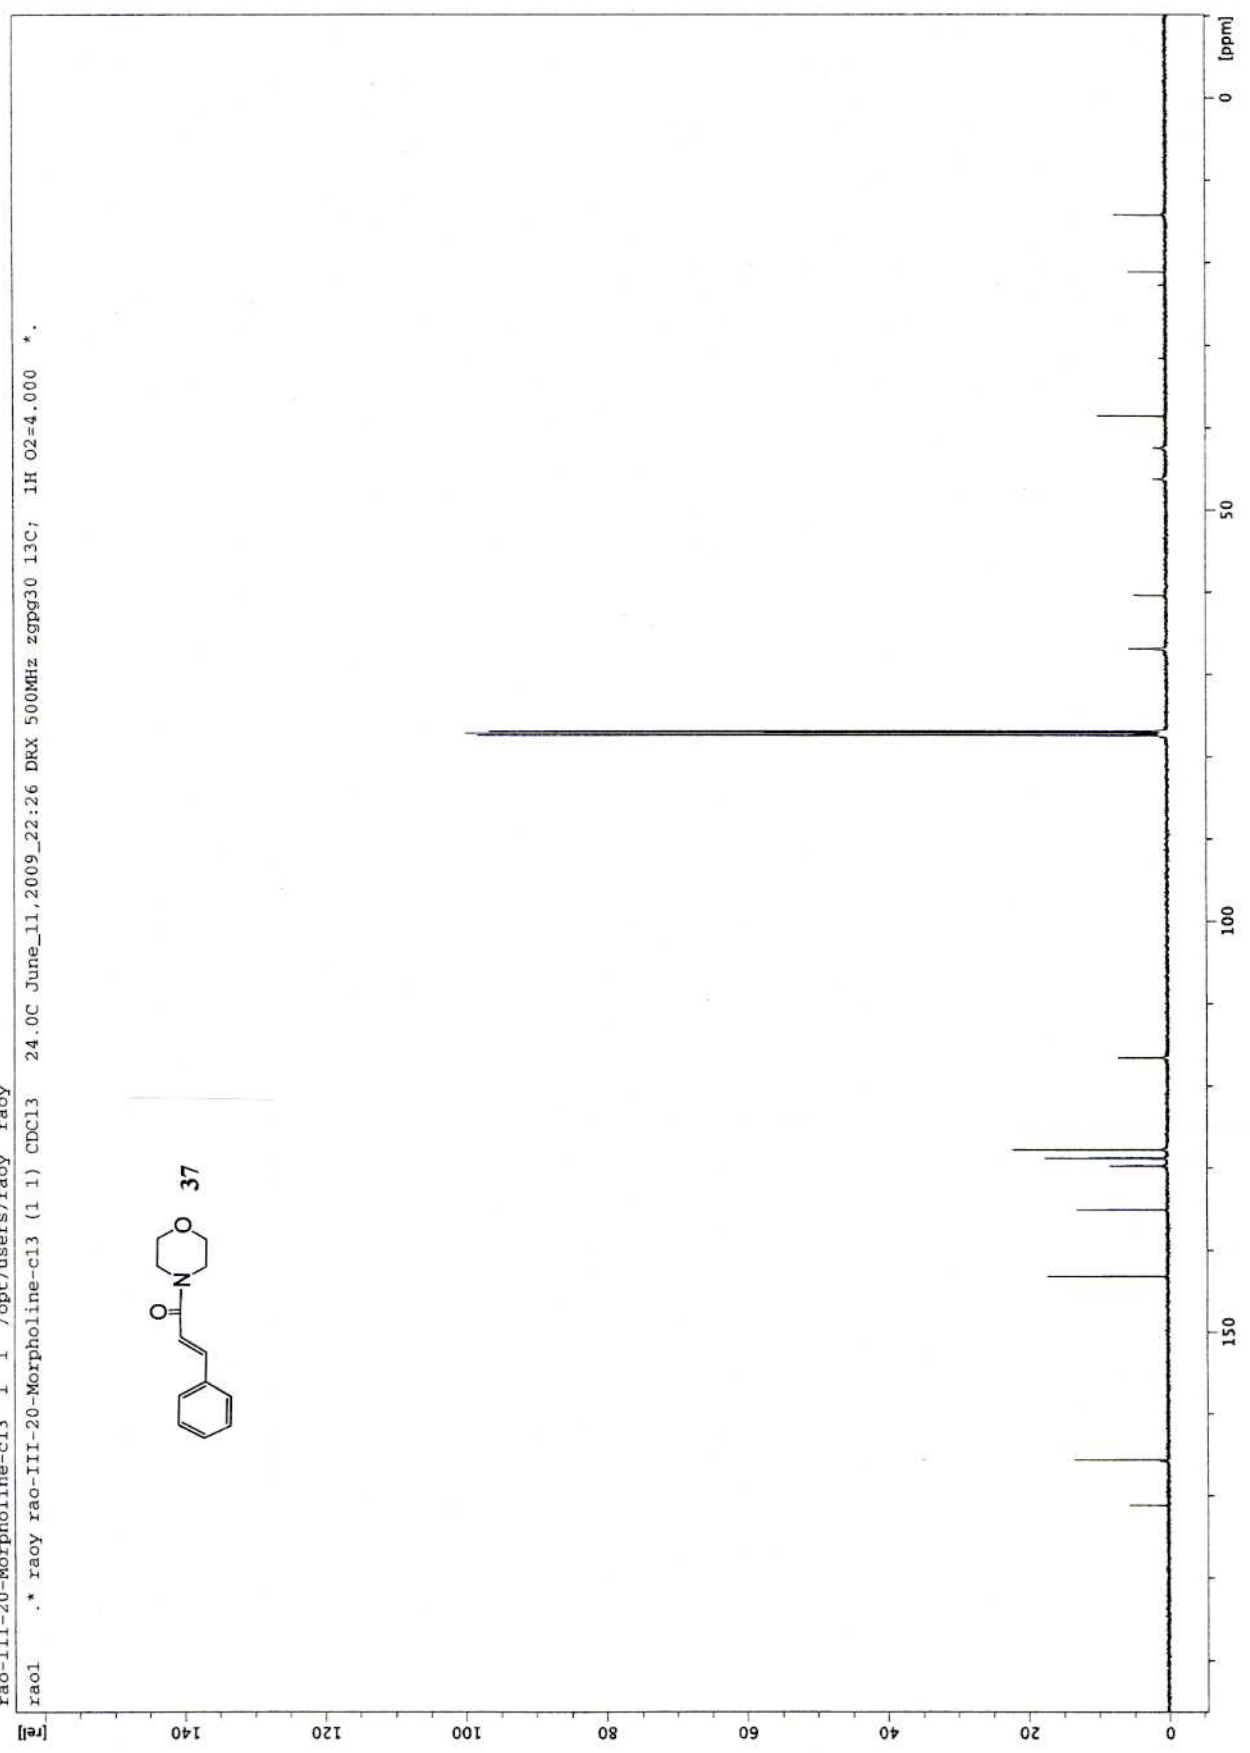

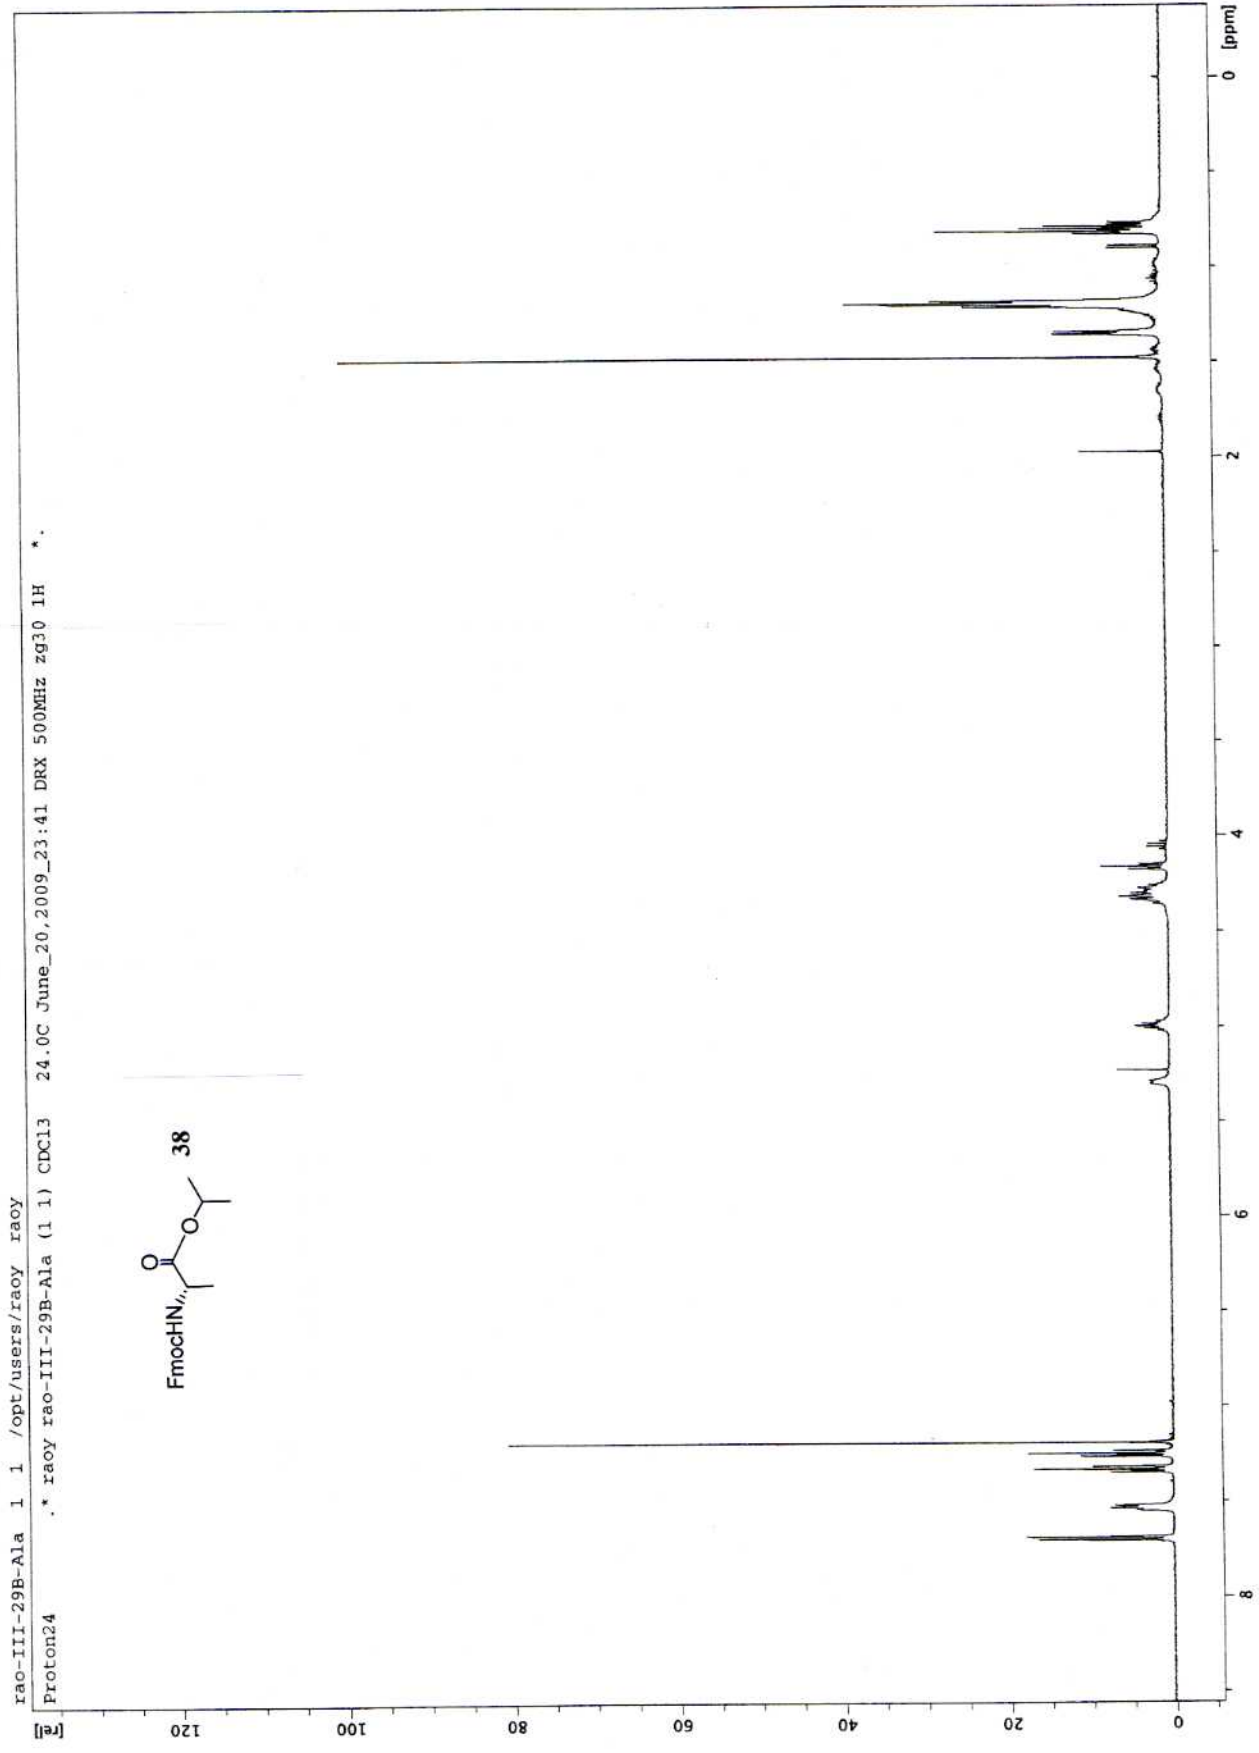

rao-III-29B-Ala 10 1 /opt/users/raoy raoy

\* raoy rao-III-29B-Ala (10 1) CDCl3 24.1C June\_21,2009\_08:34:10 Bruker AVII+ 600MHz RRL1326: zppg30 : 13C 110.000 ppm; 1H 4.500 ppm \*

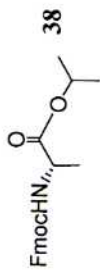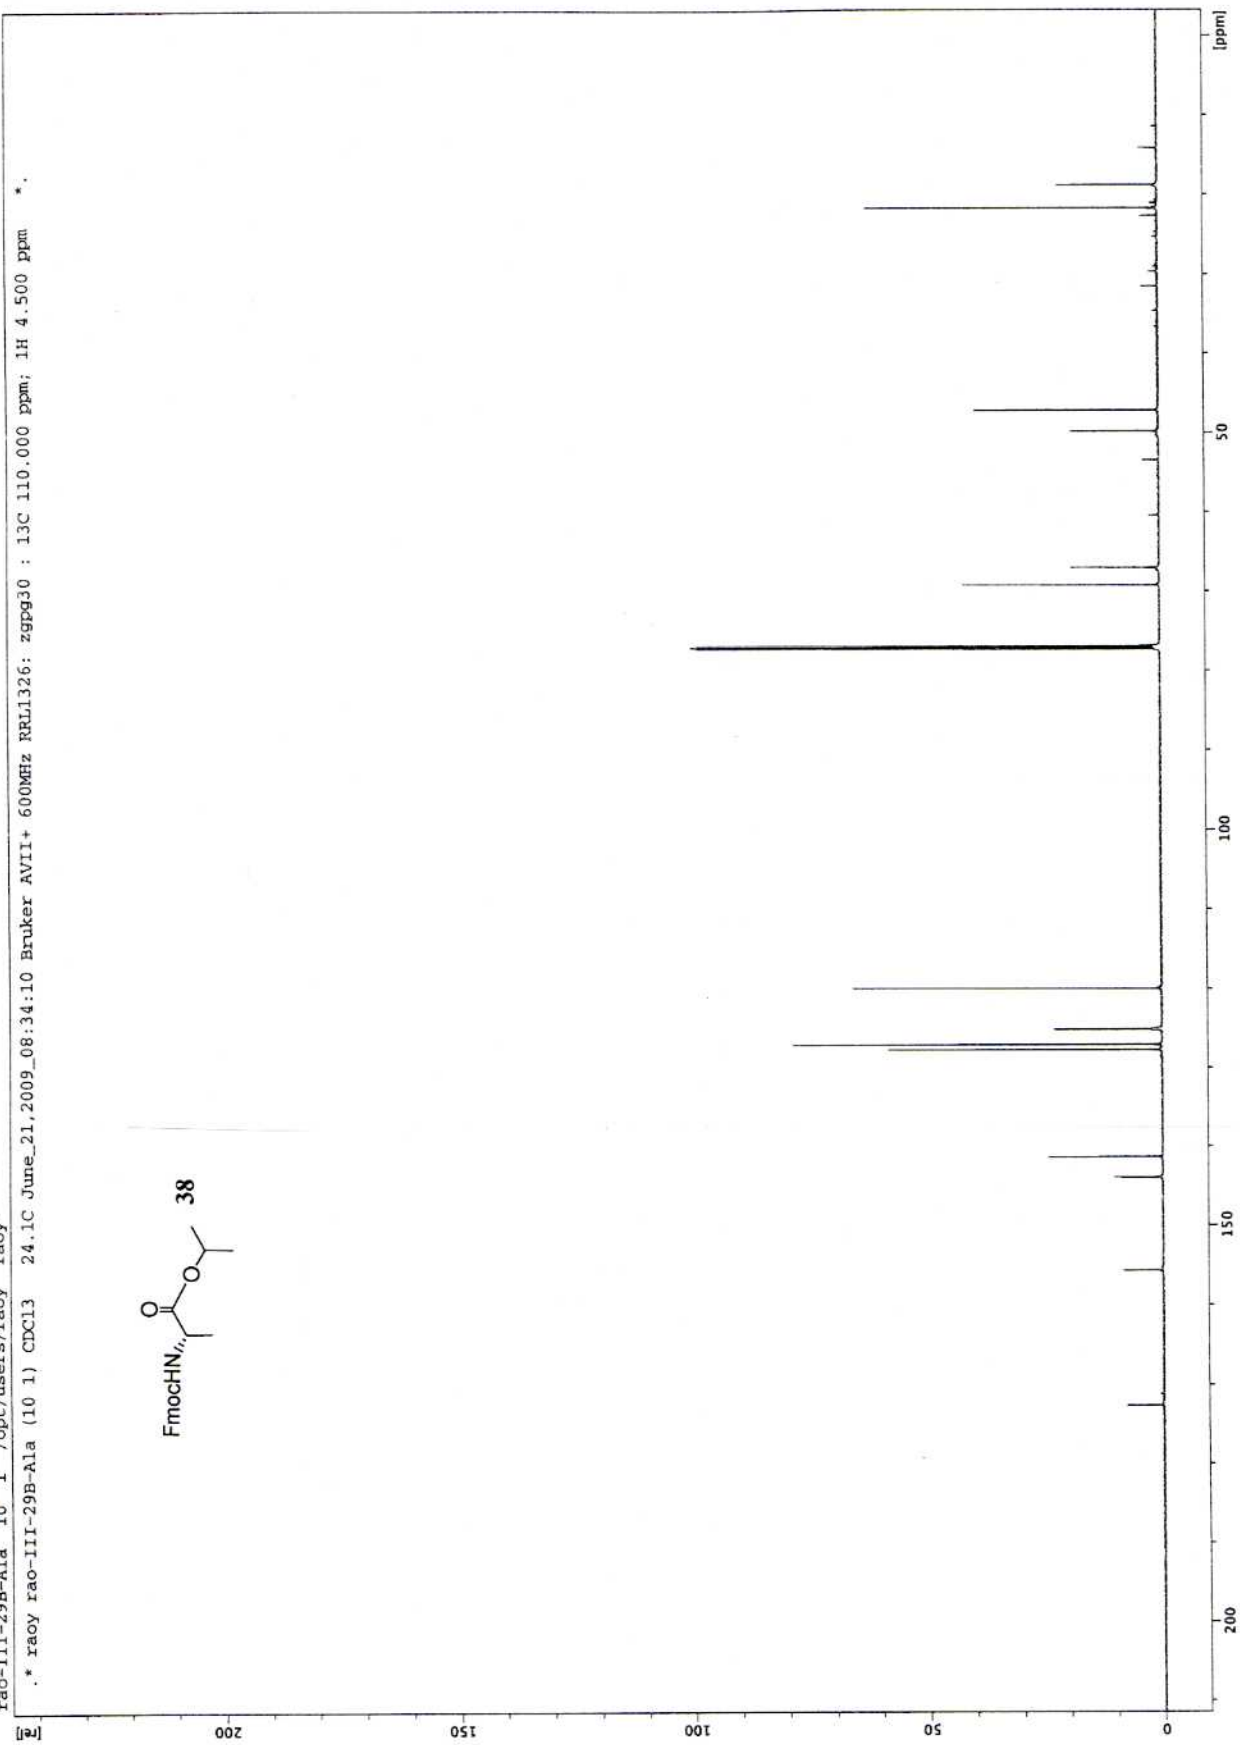



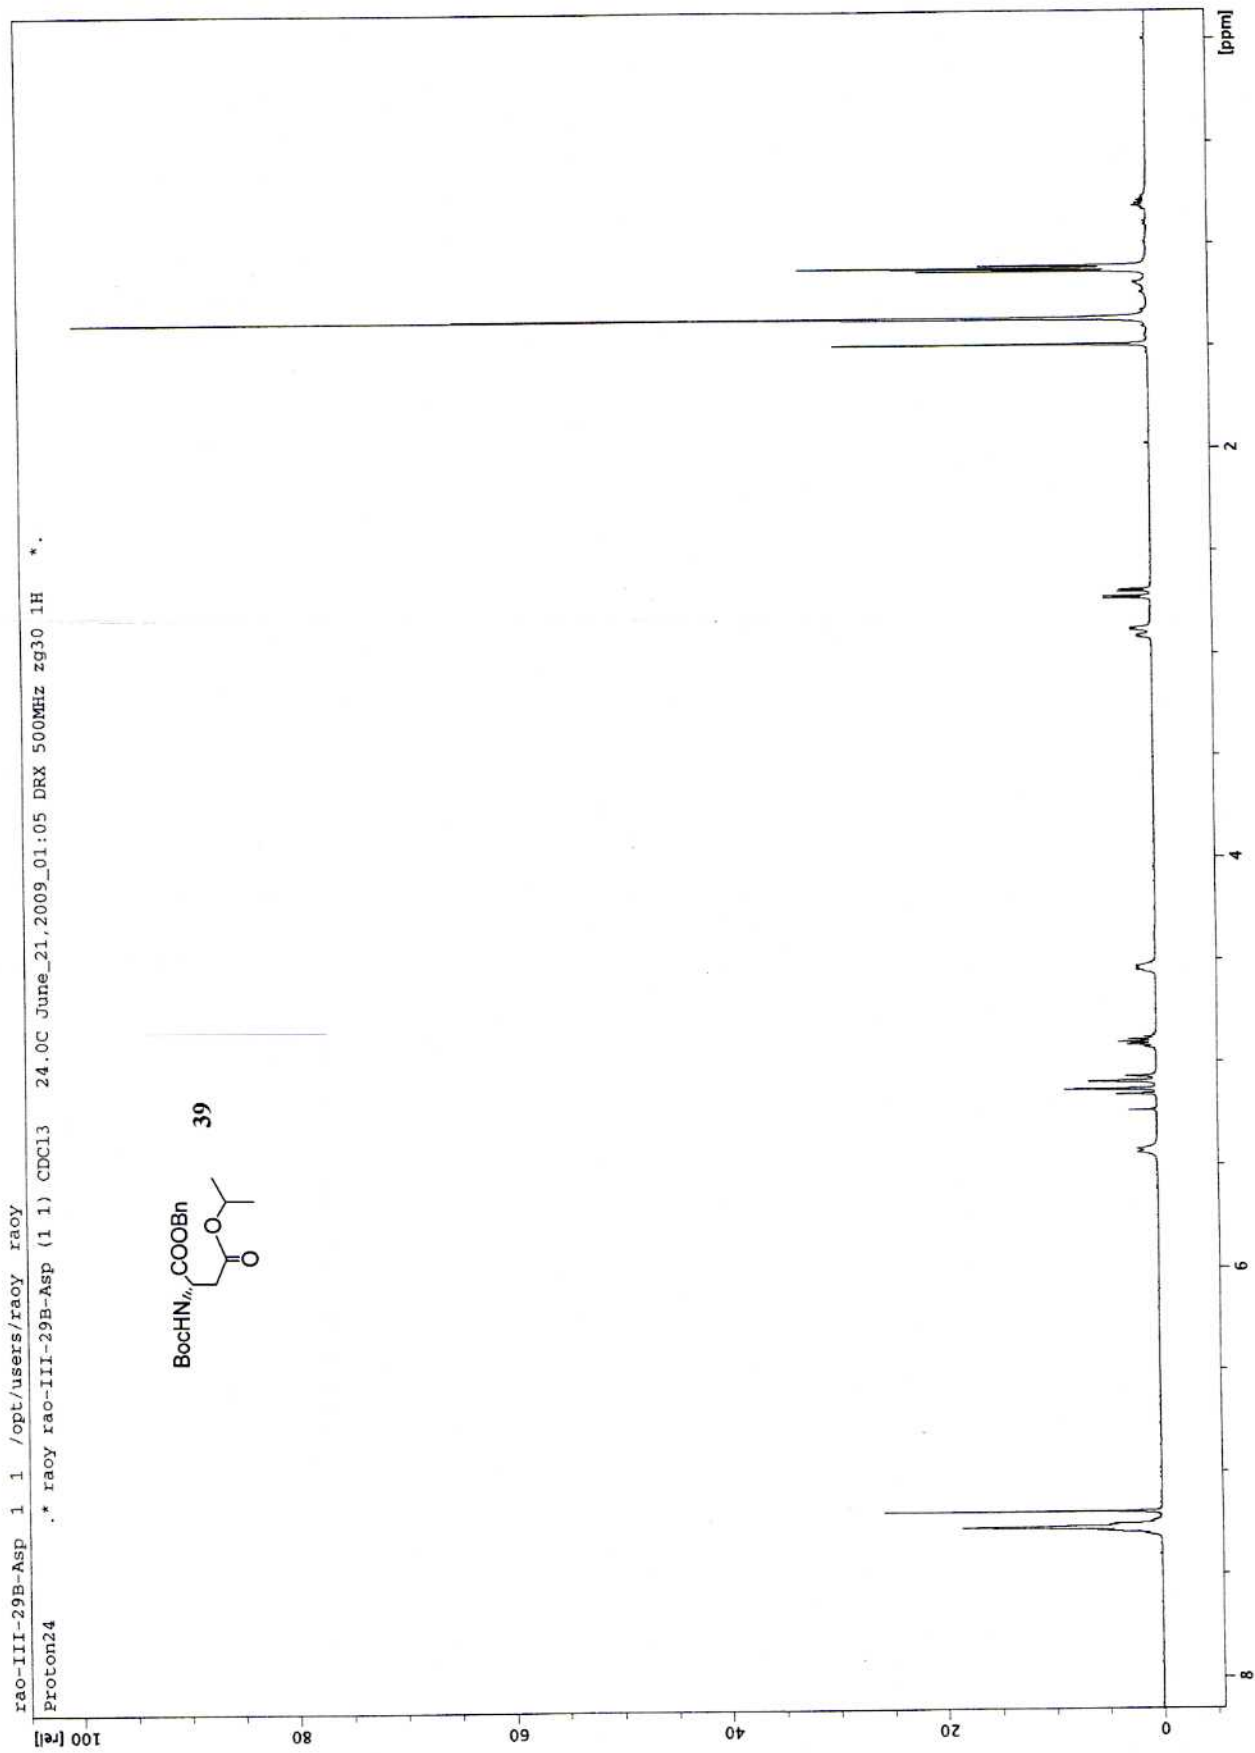

rao-III-29B-Asp 10 1 /opt/users/raoy raoy

. \* raoy rao-III-29B-Asp (10 1) CDCl3 24.1c June\_21,2009\_16:45:13 Bruker AVII+ 600MHz RRL1326: zgpg30 : 13C 110.000 ppm; 1H 4.500 ppm \*.

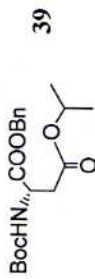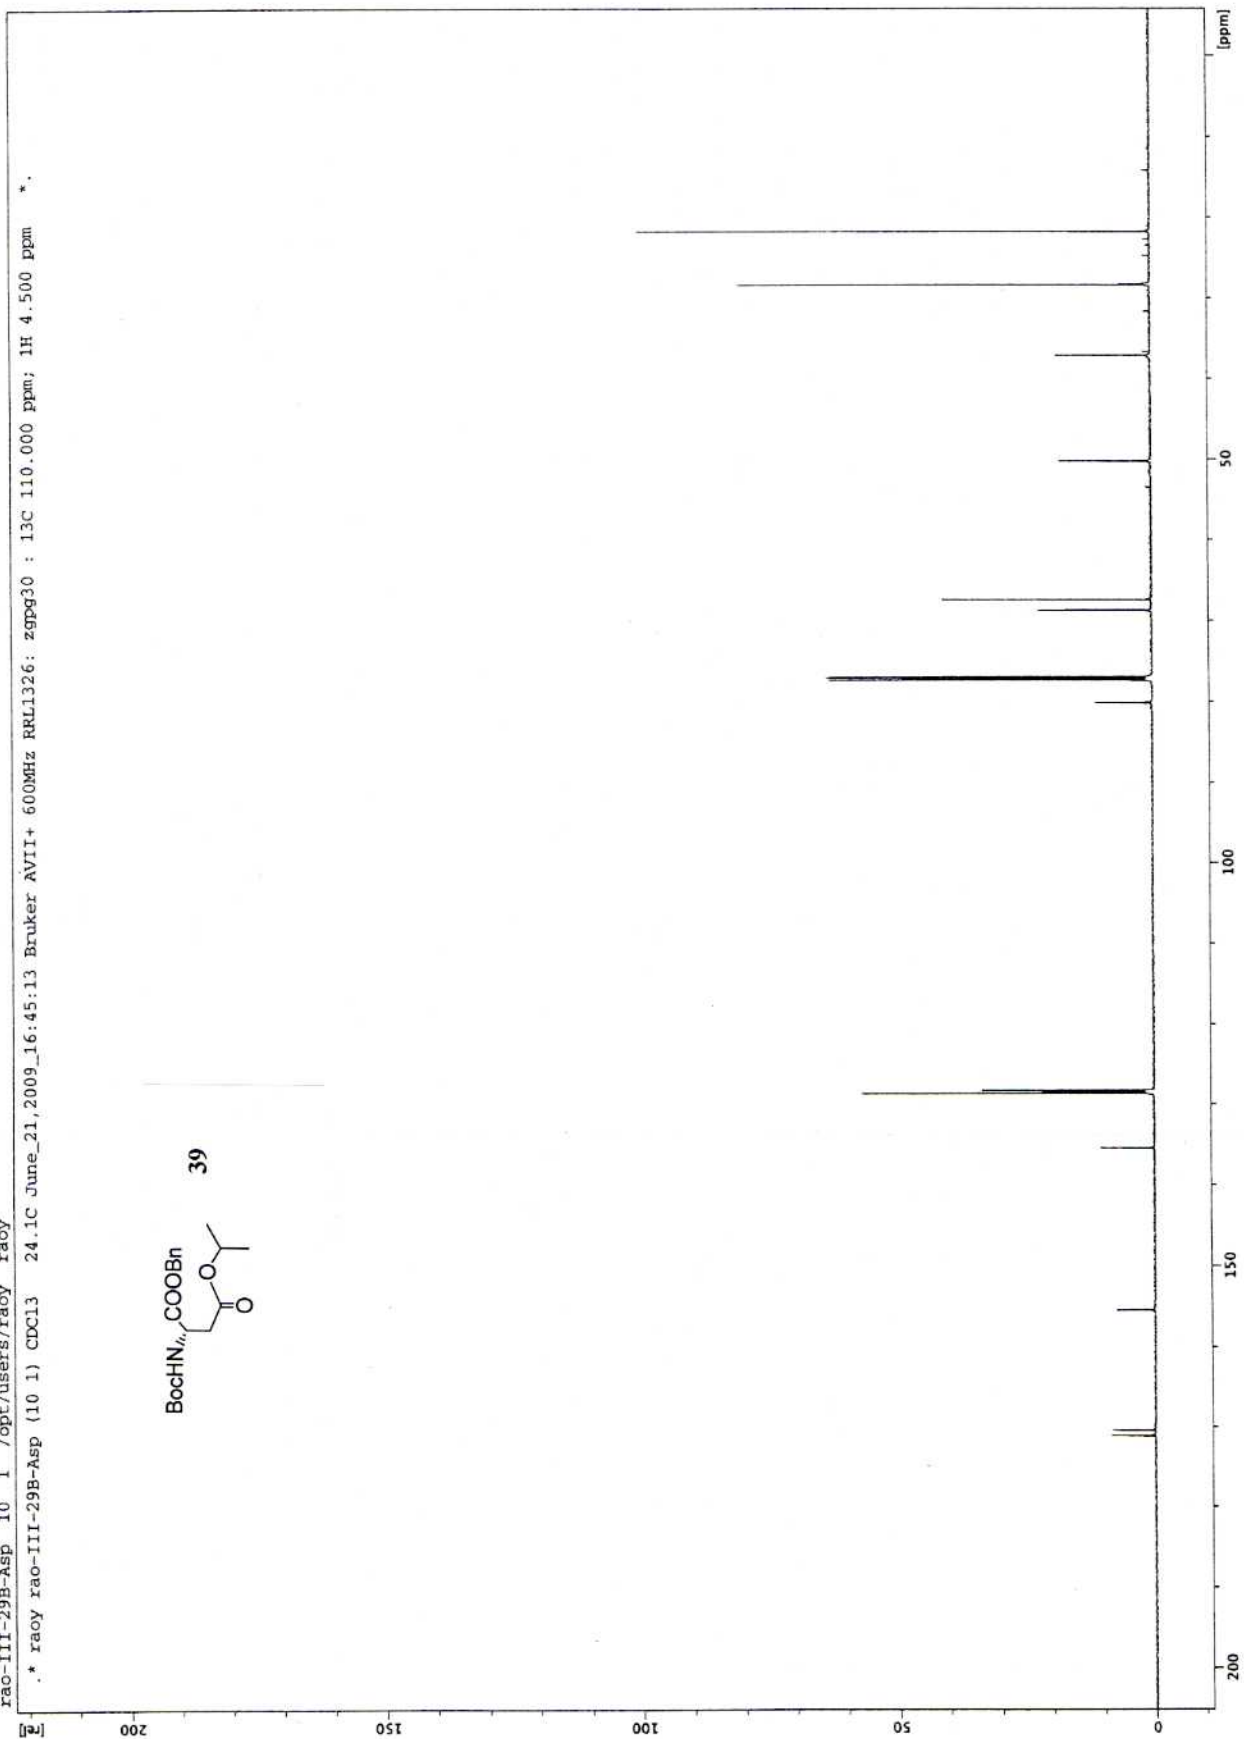

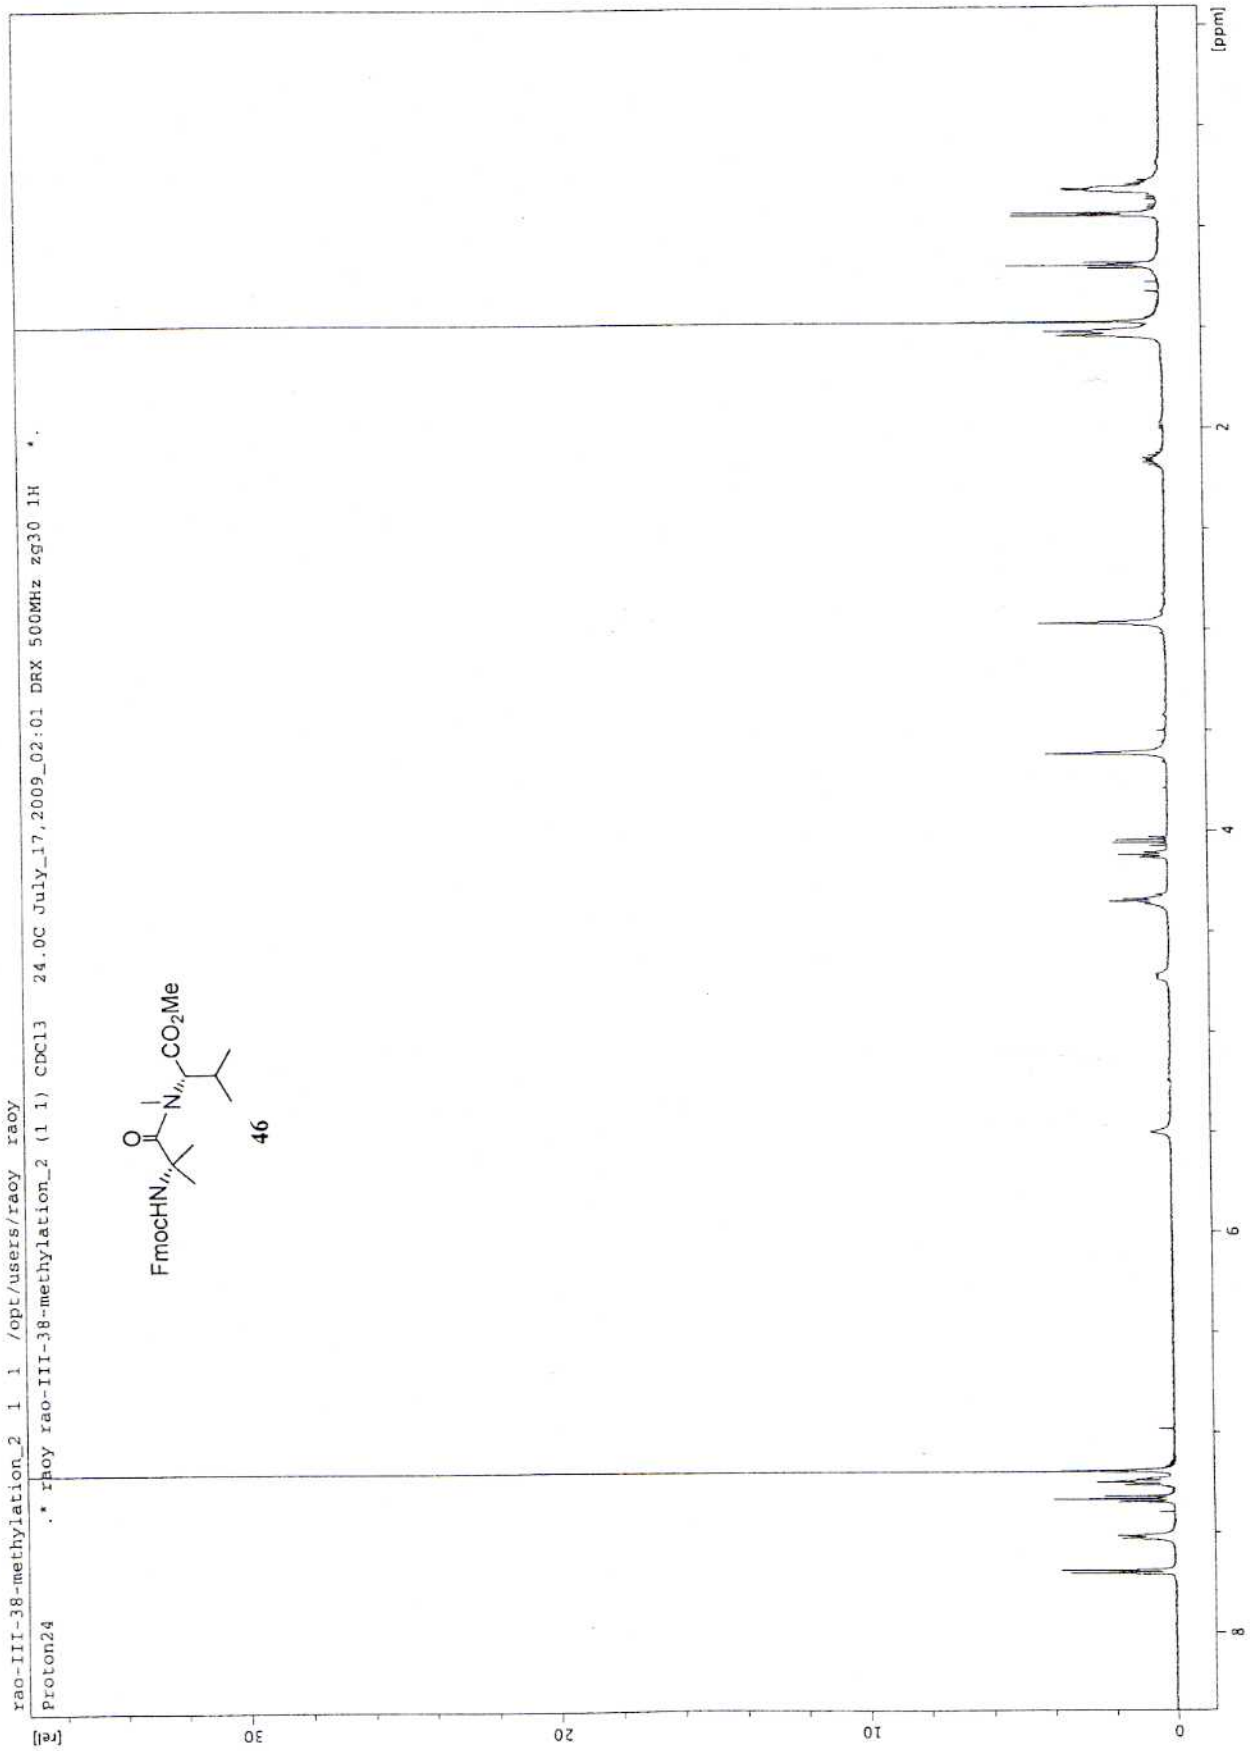

rao-III-38-methylation 10 1 /opt/users/raoy raoy  
\* raoy rao-III-38-methylation (10 1) CDCl3 24.1C July\_17,2009\_02:35:08 Bruker AVII+ 600MHz RRL1326: zgpg30 : 13C 110.000 ppm; 1H 4.500 ppm \*

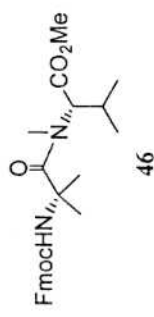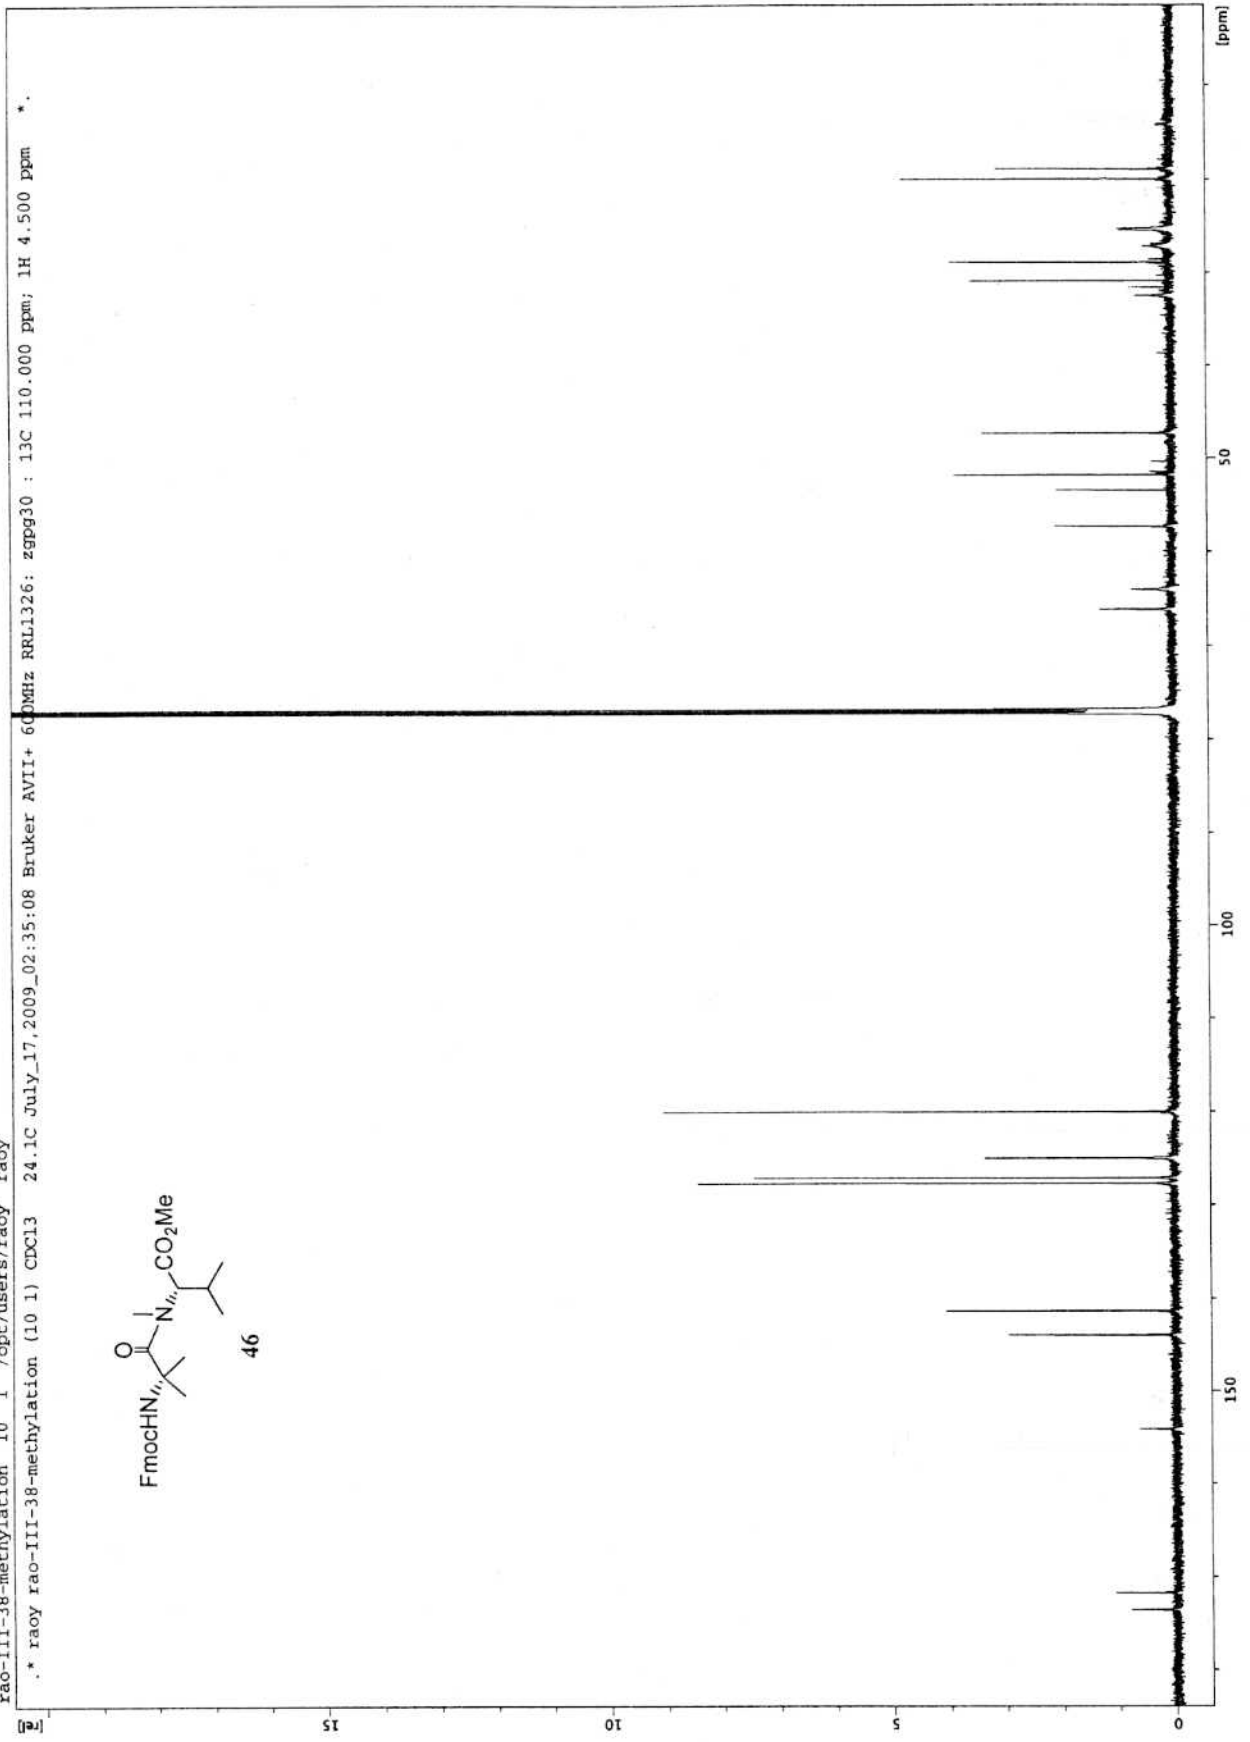

Supplement: NIHMS141139-supplement-1_si_001.pdf [file NIHMS141139-supplement-1_si_001.pdf]
